# Supplementary material for: Decylubiquinone Inhibits Colorectal Cancer Growth Through Upregulating Sirtuin2
Source: Front Pharmacol. 2022 Feb 1;12:804265. doi: 10.3389/fphar.2021.804265 (PMC8844026; doi:10.3389/fphar.2021.804265)
Supplement: Supplementary file 1 [file Table3.XLSX]

## Sheet: Figure 4A-HCT116 migration Raw 
#3	DMSO		22.92μM		44.58μM			DMSO	22.92μM	44.58μM
1	277		219		266			334.111	320.333	200.333
2	339		240		310			310	285.778	253.778
3	336		189		369			307.5	250.56	235.78
4	364		170		348
5	361		228		324
6	346		199		358
7	376		193		317
8	316		170		321
9	292		195		270
迁移细胞数	3007	334.111	1803	200.333	2883	320.333
#1	DMSO		22.92μM		44.58μM
1	310		266		249
2	307		269		257
3	295		217		290
4	317		216		265
5	315		256		311
6	318		283		266
7	293		248		276
8	321		260		348
9	330		269		310
迁移细胞数	310		253.778		285.778
#2	DMSO		22.92μM		44.58μM
1	308		235		230
2	281		222		237
3	270		261		264
4	258		240		214
5	255		253		260
6	259		267		256
7	262		272		199
8	282		271		241
9	285		234		221
迁移细胞数	307.5		250.556		235.778

## Sheet: Figure 4A-HCT116-invasion Raw d
DMSO		count									count									count
	图像_52204.tif	193	10151	52.596	0.216	108.474	5695.21		22.92	图像_52216.tif	188	9489	50.473	0.202	132.794	6699.43		45.84	图像_52231.tif	116	6072	52.345	0.129	106.264	5560.55
	图像_52205.tif	174	9132	52.483	0.194	99.796	5234.99			图像_52217.tif	194	9834	50.691	0.209	137.019	6936.99			图像_52232.tif	136	7178	52.779	0.153	81.794	4294.59
	图像_52206.tif	245	12852	52.457	0.273	116.17	6069.99			图像_52218.tif	145	7478	51.572	0.159	137.89	7095.43			图像_52233.tif	103	5421	52.631	0.115	85.049	4460.95
	图像_52207.tif	263	13790	52.433	0.293	123.256	6455.77			图像_52219.tif	102	5286	51.824	0.112	104.699	5419.44			图像_52234.tif	118	6345	53.771	0.135	93.306	5011.46
	图像_52208.tif	193	10056	52.104	0.214	132.199	6887.47			图像_52220.tif	153	8101	52.948	0.172	140.679	7435.39			图像_52235.tif	145	7473	51.538	0.159	111.736	5728.47
	图像_52209.tif	200	10518	52.59	0.224	120.228	6304.4			图像_52221.tif	169	8824	52.213	0.188	124.525	6495.66			图像_52236.tif	125	6743	53.944	0.143	77.977	4201.06
	图像_52210.tif	206	10847	52.655	0.231	115.835	6084.32			图像_52222.tif	191	10001	52.361	0.213	116.898	6112.93			图像_52237.tif	125	6539	52.312	0.139	106.297	5553.26
		count								图像_52223.tif	110	5879	53.445	0.125	121.662	6485.17
DMSO	图像_52224.tif	158	8097	51.247	0.172	152.143	7791.27											45.84	图像_52238.tif	99	5290	53.434	0.113	69.025	3684.71
	图像_52225.tif	232	12079	52.065	0.257	120.89	6287.21		22.92	图像_52211.tif	135	7050	52.222	0.15	140.027	7304.19			图像_52239.tif	129	6950	53.876	0.148	97.767	5252.85
	图像_52226.tif	130	6663	51.254	0.142	156.033	7985.03			图像_52212.tif	95	4980	52.421	0.106	113.276	5932.06
	图像_52227.tif	265	13582	51.253	0.289	143.822	7362.23			图像_52213.tif	201	10486	52.169	0.223	146.255	7620.88
	图像_52228.tif	186	9663	51.952	0.206	146.865	7625.55			图像_52214.tif	202	10284	50.911	0.219	153.776	7816.53
	图像_52230.tif	203	10685	52.635	0.227	133.641	7019.73			图像_52215.tif	124	6343	51.153	0.135	158.658	8110.53
											DMSO	22.92μM	44.58μM
											193	188	116
											174	194	136
											245	145	103
											263	102	118
											193	153	145
											200	169	125
											206	191	125
												110
											158		99
											232	135	129
											130	95
											265	201
											186	202
											203	124

## Sheet: Figure 4B-LoVo migration Raw da
第一次	DMSO	DUB/2	DUB		第二次	DMSO		DUB/2		DUB		第三次	lovo-1-dmso		lovo-1-dub-o.5		lovo-1-dub
	181	126	100					277		267					240		298
2	159	178	109			242		294		242			331		321		261
3	153	158	129			271		305		277			325		260		290
4	221	157				293		292		256			353				293
5	233	180	166			285		266		269			367		255
6	169	163	135			276		304		268			340		280		284
7						242		287					365		296		284
8	185	151				335				204			378		307		266
9	173	159	162			381		258		249			284		344		237
10		156	153			347		275		259			310		311		270
11
	1474	1428	954			2672		2558		2291			3053		2614		2483
	147.4	142.8	95.4			267.2		255.8		229.1			305.3		261.4		232
	294.8	285.6	190.8
DMSO	14.05μM	28.11μM
294.8	285.6	190.8
267.2	255.8	229.1
305.3	261.4	232			DMSO	14.05μM	28.11μM			DMSO	14.05μM	28.11μM
					181	126	100			242	277	267
					159	178	109			271	294	242
					153	158	129			293	305	277
					221	157	184			285	292	256
					233	180	166			276	266	269
					169	163	135			242	304	268
					273	151	172			335	287	204
					185	159	162			381	258	249
					173	156	153			347	275	259
				1	242	277	267			331	240	298
					271	294	242			325	321	261
					293	305	277			353	260	290
					285	292	256			367	255	293
					276	266	269			340	280	284
					242	304	268			365	296	284
					335	287	204			378	307	266
					381	258	249			284	344	237
					347	275	259			310	311	270
					331	240	298
					325	321	261
					353	260	290
					367	255	293
				2	340	280	284
					365	296	284
					378	307	266
					284	344	237
					310	311	270

## Sheet: Figure 4B-LoVo-invasion Raw dat
1#	DMSO		14.05μM		28.11μM			2#	DMSO		14.05μM		28.11μM
1	211		168		107			1	262		227		161
2	203		194		141			2	249		224		192
3	185		225		200			3	266		194		173
4	238		200					4	304		217		117
5	269		216		153			5	240		195		117
6	226		203		97			6	225		218		147
7								7	256		140		167
8								8	282		226		177
9								9			197		134
10								10			204		115
11								11			207		165
12								12			164		157
13
	第一次	DMSO	14.05μM	28.11μM		第二次	DMSO	14.05μM	28.11μM		第三次	DMSO	14.05μM	28.11μM
		211	168	107			155	153	130			262	227	161
		203	194	141			241	182	162			249	224	192
		185	225	200			276	199	133			266	194	173
		238	200				223	169	126			304	217	117
		269	216	153			253	191	128			240	195	117
		226	203	97			264	185	148			225	218	147
		222	201	139.6			240	209				256	140	167
							236	184	137.833			282	226	177
												260.5	205.125	156.375
			DMSO	14.05μM	28.11μM
			222	201	139.6
			236	184	137.833
			260.5	205.125	156.375
