# Supplementary material for: Decylubiquinone Inhibits Colorectal Cancer Growth Through Upregulating Sirtuin2
Source: Front Pharmacol. 2022 Feb 1;12:804265. doi: 10.3389/fphar.2021.804265 (PMC8844026; doi:10.3389/fphar.2021.804265)
Supplement: Supplementary file 2 [file Table2.XLS]

## Sheet: Figure 3A HCT116 MTT Raw data
Well	570	Count	Mean	Std Dev	CV (%)
B2	0.899	4	0.846	0.09	10.583		DMSO	空白	0	6	25	50	60	70
C2	0.888						0.846	0.455	0.905	0.804	0.683	0.479	0.151	0.13
D2	0.885						0.85	0.483	0.878	0.815	0.643	0.361	0.266	0.176
E2	0.712						0.876	0.48	0.99067	0.777	0.638	0.398	0.356	0.293
B3	0.986	4	0.905	0.08	8.818	Mean	0.857333	0.472667	0.924557	0.798667	0.654667	0.412667	0.257667	0.199667
C3	0.923
D3	0.916							DMSO	空白	0	6	25	50	60
E3	0.795							0.857333	0.472667	0.924557	0.798667	0.654667	0.412667	0.257667
B4	0.794	4	0.804	0.035	4.337
C4	0.852
D4	0.8
E4	0.769								实验组	对照组	细胞存活率	IC50	IC50/2
B5	0.898	4	0.967	0.221	22.893			0	0.924557	0.924557	1	45.8421	22.9211
C5	1.284							6	0.798667	0.924557	0.863837
D5	0.77							25	0.654667	0.924557	0.708087
E5	0.914							50	0.412667	0.924557	0.44634
B6	0.582	4	0.683	0.145	21.21			60	0.257667	0.924557	0.278692
C6	0.738							70	0.199667	0.924557	0.215959
D6	0.861							100	0.0753333	0.924557	0.0814805
E6	0.549
B7	0.434	4	0.479	0.066	13.849
C7	0.438
D7	0.576
E7	0.469
B8	0.16	4	0.151	0.011	6.967
C8	0.16
D8	0.14
E8	0.144
B9	0.106	4	0.13	0.037	28.257
C9	0.138
D9	0.178
E9	0.097
B10	0.069	4	0.072	0.008	11.169
C10	0.067
D10	0.084
E10	0.068
B12	0.47	4	0.455	0.026	5.754
C12	0.416
D12	0.467
E12	0.468
Well	570	Count	Mean	Std Dev	CV (%)
B2	0.72	4	0.85	0.102	11.964
C2	0.848
D2	0.968
E2	0.864
B3	1.059	4	0.878	0.122	13.931
C3	0.836
D3	0.794
E3	0.821
B4	0.743	4	0.815	0.182	22.353
C4	0.694
D4	0.736
E4	1.086
B5	0.589	4	0.687	0.083	12.072
C5	0.789
D5	0.701
E5	0.667
B6	0.559	4	0.643	0.172	26.72
C6	0.9
D6	0.556
E6	0.555
B7	0.368	4	0.361	0.044	12.048
C7	0.42
D7	0.333
E7	0.324
B8	0.328	4	0.266	0.054	20.143
C8	0.286
D8	0.202
E8	0.249
B9	0.169	4	0.176	0.018	10.425
C9	0.203
D9	0.162
E9	0.17
B10	0.075	4	0.072	0.003	4.288
C10	0.074
D10	0.068
E10	0.073
B12	0.477	4	0.483	0.018	3.645
C12	0.464
D12	0.506
E12	0.485
Well	570	Count	Mean	Std Dev	CV (%)
B2	0.849	4	0.876	0.057	6.549
C2	0.962
D2	0.853
E2	0.841
B3	0.936	3	0.99067	0.136	12.862
C3	1.251
D3	1.019
E3	1.017
B4	0.682	4	0.777	0.103	13.24
C4	0.908
D4	0.807
E4	0.709
B5	0.815	4	0.796	0.111	13.933
C5	0.826
D5	0.904
E5	0.641
B6	0.699	4	0.638	0.102	16.038
C6	0.741
D6	0.597
E6	0.514
B7	0.363	4	0.398	0.051	12.878
C7	0.473
D7	0.387
E7	0.368
B8	0.364	2	0.356	0.169	33.904
C8	0.596
D8	0.687
E8	0.348
B9	0.27	4	0.293	0.022	7.346
C9	0.282
D9	0.319
E9	0.301
B10	0.095	4	0.082	0.01	11.875
C10	0.08
D10	0.072
E10	0.079
B12	0.484	4	0.48	0.003	0.564
C12	0.479
D12	0.478
E12	0.479

## Sheet: Figure 3A LoVo MTT Raw data
Well ID	Name	Well	570	Count	Mean	Std Dev	CV (%)		第一次	第二次	第三次	Mean
SPL1		B2	0.331	4	0.328	0.009	2.644	对照 0	0.355	0.422	0.421	0.399333
		C2	0.319					6	0.344	0.398	0.415	0.385667
		D2	0.338					12.5	0.39	0.422	0.469	0.427
		E2	0.322					25	0.226	0.32	0.257	0.267667
SPL2		B3	0.351	4	0.355	0.003	0.809	35	0.172	0.293	0.194	0.219667
		C3	0.357					45	0.116	0.169	0.082	0.122333
		D3	0.357					50	0.071	0.132	0.074	0.0923333
		E3	0.356					DMSO+cell	0.328	0.369	0.374	0.357
SPL3		B4	0.343	4	0.344	0.011	3.14	空白	0.049	0.049	0.052	0.05
		C4	0.33									#DIV/0!
		D4	0.356					对照减空白	0.306	0.373	0.369	0.349333
		E4	0.347						细胞存活率	细胞存活率	细胞存活率
SPL4		B5	0.38	4	0.39	0.013	3.291	6	0.964052	0.935657	0.98374
		C5	0.379					12.5	1.11438	1	1.13008
		D5	0.397					25	0.578431	0.726542	0.555556
		E5	0.405					35	0.401961	0.654155	0.384824
SPL5		B6	0.223	4	0.244	0.038	15.415	45	0.218954	0.321716	0.0813008
		C6	0.217					50	0.0718954	0.22252	0.0596206
		D6	0.237
		E6	0.299					0	1	1	1
			0.677		0.225667			6	0.964052	0.935657	0.98374	1.94779
SPL6		B7	0.185	4	0.172	0.02	11.473	25	0.578431	0.726542	0.555556	1.13399
		C7	0.158					35	0.401961	0.654156	0.384824	0.786785
		D7	0.152					45	0.218954	0.321716	0.0813008	0.300255
		E7	0.192					50	0.0718954	0.22252	0.0596206	0.131516
SPL7		B8	0.102	4	0.116	0.015	13.128
		C8	0.124
		D8	0.133							DUb 浓度	细胞存活率	IC50
		E8	0.104							0	1	28.0667
SPL8		B9	0.066	4	0.079	0.016	20.248			6	0.973896
		C9	0.102							25	0.566994
		D9	0.072							35	0.393392
		E9	0.075							45	0.150128
			0.213		0.071					50	0.065758
SPL9		B12	0.049	4	0.049	0.001	1.026
		C12	0.049
		D12	0.049
		E12	0.048
Well ID	Name	Well	570	Count	Mean	Std Dev	CV (%)
SPL1		B2	0.377	4	0.369	0.024	6.603
		C2	0.368
		D2	0.394
		E2	0.336
SPL2		B3	0.43	4	0.401	0.043	10.86
		C3	0.414
		D3	0.422
		E3	0.336
			1.266		0.422
SPL3		B4	0.428	4	0.398	0.021	5.161
		C4	0.397
		D4	0.386
		E4	0.383
SPL4		B5	0.443	4	0.435	0.042	9.551
		C5	0.449
		D5	0.473
		E5	0.376
			1.268		0.422667
SPL5		B6	0.343	4	0.32	0.016	4.987
		C6	0.317
		D6	0.311
		E6	0.308
SPL6		B7	0.271	4	0.308	0.069	22.337
		C7	0.245
		D7	0.315
		E7	0.402
			0.586		0.293
SPL7		B8	0.169	4	0.169	0.005	3.232
		C8	0.17
		D8	0.161
		E8	0.174
SPL8		B9	0.126	4	0.149	0.035	23.31
		C9	0.198
		D9	0.123
		E9	0.148
			0.397		0.132333
SPL9		B12	0.049	4	0.049	0.001	1.944
		C12	0.05
		D12	0.05
		E12	0.048
Well ID	Name	Well	570	Count	Mean	Std Dev	CV (%)
SPL1		B2	0.398	4	0.374	0.029	7.65
		C2	0.341
		D2	0.358
		E2	0.397
SPL2		B3	0.447	4	0.41	0.029	7.136
		C3	0.404
		D3	0.412
		E3	0.376
			1.263		0.421
SPL3		B4	0.4	4	0.415	0.016	3.964
		C4	0.42
		D4	0.404
		E4	0.436
SPL4		B5	0.519	4	0.496	0.043	8.708
		C5	0.528
		D5	0.505
		E5	0.433
			0.938		0.469
SPL5		B6	0.276	4	0.257	0.026	9.968
		C6	0.268
		D6	0.263
		E6	0.219
SPL6		B7	0.226	4	0.194	0.025	12.892
		C7	0.172
		D7	0.176
		E7	0.2
SPL7		B8	0.071	4	0.082	0.008	9.229
		C8	0.087
		D8	0.087
		E8	0.082
SPL8		B9	0.089	4	0.086	0.025	28.745
		C9	0.119
		D9	0.072
		E9	0.063
			0.224		0.0746667
SPL9		B12	0.05	4	0.052	0.002	3.363
		C12	0.054
		D12	0.051
		E12	0.051

## Sheet: Figure 3B HCT116 Raw data
HCT116	DMSO	22.92	45.84
1	830	765	615
2	877	793	548
3	907	756	485
4	879	748	460

## Sheet: Figure 3B LoVo Raw data
LoVo	DMSO	14.05μM	28.11μM
1	1024	896	668
2	1087	956	509
3	1129	1024	599
4	1114	994	735
