# Supplementary material for: Decylubiquinone Inhibits Colorectal Cancer Growth Through Upregulating Sirtuin2
Source: Front Pharmacol. 2022 Feb 1;12:804265. doi: 10.3389/fphar.2021.804265 (PMC8844026; doi:10.3389/fphar.2021.804265)
Supplement: Supplementary file 4 [file Table6.XLSX]

## Sheet: Figure S1A-HCT116-Raw data
Depth	Name	Statistic	#Cells
	Data.001		10000
>	Lymphocytes	80.5	8047		DMSO	晚凋亡	早凋亡		22.92uM	晚凋亡	早凋亡		45.84uM	晚凋亡	早凋亡
> >	Q1: FL1-H- , FL3-H+	0.2	16			2.29	4.73			1.78	2.94			1.61	3.65
> >	Q2: FL1-H+ , FL3-H+	2.29	184			1.7	3.54			1.22	2.68			1.48	4.26
> >	Q3: FL1-H+ , FL3-H-	4.73	381			1.43	2.95			1.47	3.13			1.52	4.27
> >	Q4: FL1-H- , FL3-H-	92.8	7466			1.68	6.66			1.61	3.65			2.19	4.31
	Data.002		10000
>	Lymphocytes	71.3	7126
> >	Q1: FL1-H- , FL3-H+	0.28	20
> >	Q2: FL1-H+ , FL3-H+	1.7	121
> >	Q3: FL1-H+ , FL3-H-	3.54	252			DMSO	22.92uM	45.84uM
> >	Q4: FL1-H- , FL3-H-	94.5	6733			2.29	1.78	1.61
	Data.003		10000			1.7	1.22	1.48
>	Lymphocytes	73.3	7327			1.43	1.47	1.52
> >	Q1: FL1-H- , FL3-H+	0.3	22			1.68	1.61	2.19
> >	Q2: FL1-H+ , FL3-H+	1.43	105
> >	Q3: FL1-H+ , FL3-H-	2.95	216
> >	Q4: FL1-H- , FL3-H-	95.3	6984
	Data.004		10000
>	Lymphocytes	66	6602
> >	Q1: FL1-H- , FL3-H+	0.2	13
> >	Q2: FL1-H+ , FL3-H+	1.68	111
> >	Q3: FL1-H+ , FL3-H-	6.66	440
> >	Q4: FL1-H- , FL3-H-	91.5	6038
	Data.005		10000
>	Lymphocytes	77.3	7734
> >	Q1: FL1-H- , FL3-H+	0.31	24
> >	Q2: FL1-H+ , FL3-H+	1.78	138
> >	Q3: FL1-H+ , FL3-H-	2.94	227
> >	Q4: FL1-H- , FL3-H-	95	7345
	Data.006		10000
>	Lymphocytes	77.1	7715
> >	Q1: FL1-H- , FL3-H+	0.17	13
> >	Q2: FL1-H+ , FL3-H+	1.22	94
> >	Q3: FL1-H+ , FL3-H-	2.68	207
> >	Q4: FL1-H- , FL3-H-	95.9	7401
	Data.007		10000
>	Lymphocytes	74.9	7485
> >	Q1: FL1-H- , FL3-H+	0.23	17
> >	Q2: FL1-H+ , FL3-H+	1.47	110
> >	Q3: FL1-H+ , FL3-H-	3.13	234
> >	Q4: FL1-H- , FL3-H-	95.2	7124
	Data.008		10000
>	Lymphocytes	75.2	7524
> >	Q1: FL1-H- , FL3-H+	0.19	14
> >	Q2: FL1-H+ , FL3-H+	1.61	121
> >	Q3: FL1-H+ , FL3-H-	3.65	275
> >	Q4: FL1-H- , FL3-H-	94.6	7114
	Data.009		10000
>	Lymphocytes	79.8	7981
> >	Q1: FL1-H- , FL3-H+	0.31	25
> >	Q2: FL1-H+ , FL3-H+	1.48	118
> >	Q3: FL1-H+ , FL3-H-	4.26	340
> >	Q4: FL1-H- , FL3-H-	93.9	7498
	Data.010		10000
>	Lymphocytes	75.8	7582
> >	Q1: FL1-H- , FL3-H+	0.21	16
> >	Q2: FL1-H+ , FL3-H+	1.52	115
> >	Q3: FL1-H+ , FL3-H-	4.27	324
> >	Q4: FL1-H- , FL3-H-	94	7127
	Data.011		10000
>	Lymphocytes	76.4	7642
> >	Q1: FL1-H- , FL3-H+	0.12	9
> >	Q2: FL1-H+ , FL3-H+	2.19	167
> >	Q3: FL1-H+ , FL3-H-	4.31	329
> >	Q4: FL1-H- , FL3-H-	93.4	7137
	Data.012		10000
>	Lymphocytes	78.5	7848
> >	Q1: FL1-H- , FL3-H+	0.32	25
> >	Q2: FL1-H+ , FL3-H+	2.08	163
> >	Q3: FL1-H+ , FL3-H-	4.77	374
> >	Q4: FL1-H- , FL3-H-	92.8	7286

## Sheet: Figure S1A-LoVo Raw data
Depth	Name	Statistic	#Cells	DMSO	晚凋亡	早凋亡		14.05uM	晚凋亡	早凋亡		28.11uM	晚凋亡	早凋亡			Depth	Name	Statistic	#Cells	DMSO	晚凋亡	早凋亡		14.05uM	晚凋亡	早凋亡		28.11uM	晚凋亡	早凋亡
	Data.001		5610		2.81	2.3			1.95	4.7			2	3.22				Data.001		10000		2.01	0.42			1.86	0.5			1.03	0.8
>	Lymphocytes	70.5	3954		2.26	4.02			2.31	5.24			2.58	3.36			>	Lymphocytes	94.5	9449		1.81	0.27			1.73	0.64			2.19	0.97
> >	Q1: FL1-H- , FL3-H+	0.33	13										2.31	3.25			> >	Q1: FL1-H- , FL3-H+	0.37	35		1.69	0.34			2.97	0.81			1.83	0.51
> >	Q2: FL1-H+ , FL3-H+	2.81	111														> >	Q2: FL1-H+ , FL3-H+	2.01	190
> >	Q3: FL1-H+ , FL3-H-	2.3	91														> >	Q3: FL1-H+ , FL3-H-	0.42	40
> >	Q4: FL1-H- , FL3-H-	94.6	3739														> >	Q4: FL1-H- , FL3-H-	97.2	9184
	Data.002		10000															Data.002		10000
>	Lymphocytes	85.9	8592														>	Lymphocytes	96.4	9645
> >	Q1: FL1-H- , FL3-H+	0.17	15														> >	Q1: FL1-H- , FL3-H+	0.33	32
> >	Q2: FL1-H+ , FL3-H+	2.26	194														> >	Q2: FL1-H+ , FL3-H+	1.81	175
> >	Q3: FL1-H+ , FL3-H-	4.02	345														> >	Q3: FL1-H+ , FL3-H-	0.27	26
> >	Q4: FL1-H- , FL3-H-	93.6	8038														> >	Q4: FL1-H- , FL3-H-	97.6	9412
	Data.003		10000															Data.003		10000
>	Lymphocytes	85.3	8527														>	Lymphocytes	96.1	9612
> >	Q1: FL1-H- , FL3-H+	0.13	11														> >	Q1: FL1-H- , FL3-H+	0.44	42
> >	Q2: FL1-H+ , FL3-H+	1.95	166														> >	Q2: FL1-H+ , FL3-H+	1.69	162
> >	Q3: FL1-H+ , FL3-H-	4.7	401														> >	Q3: FL1-H+ , FL3-H-	0.34	33
> >	Q4: FL1-H- , FL3-H-	93.2	7949														> >	Q4: FL1-H- , FL3-H-	97.5	9375
	Data.004		10000															Data.004		10000
>	Lymphocytes	76.9	7694														>	Lymphocytes	96.7	9672
> >	Q1: FL1-H- , FL3-H+	0.065	5														> >	Q1: FL1-H- , FL3-H+	0.16	15
> >	Q2: FL1-H+ , FL3-H+	2.31	178														> >	Q2: FL1-H+ , FL3-H+	1.86	180
> >	Q3: FL1-H+ , FL3-H-	5.24	403														> >	Q3: FL1-H+ , FL3-H-	0.5	48
> >	Q4: FL1-H- , FL3-H-	92.4	7108														> >	Q4: FL1-H- , FL3-H-	97.5	9429
	Data.005		10000															Data.005		10000
>	Lymphocytes	86.1	8608														>	Lymphocytes	96.8	9684
> >	Q1: FL1-H- , FL3-H+	0.26	22														> >	Q1: FL1-H- , FL3-H+	0.27	26
> >	Q2: FL1-H+ , FL3-H+	2	172														> >	Q2: FL1-H+ , FL3-H+	1.73	168
> >	Q3: FL1-H+ , FL3-H-	3.22	277														> >	Q3: FL1-H+ , FL3-H-	0.64	62
> >	Q4: FL1-H- , FL3-H-	94.5	8137														> >	Q4: FL1-H- , FL3-H-	97.4	9428
	Data.006		10000															Data.006		10000
>	Lymphocytes	85.9	8590														>	Lymphocytes	32	3201
> >	Q1: FL1-H- , FL3-H+	0.23	20														> >	Q1: FL1-H- , FL3-H+	0.34	11
> >	Q2: FL1-H+ , FL3-H+	2.58	222														> >	Q2: FL1-H+ , FL3-H+	2.97	95
> >	Q3: FL1-H+ , FL3-H-	3.36	289														> >	Q3: FL1-H+ , FL3-H-	0.81	26
> >	Q4: FL1-H- , FL3-H-	93.8	8059														> >	Q4: FL1-H- , FL3-H-	95.9	3069
	Data.007		10000															Data.007		10000
>	Lymphocytes	92	9195														>	Lymphocytes	96.7	9671
> >	Q1: FL1-H- , FL3-H+	0.14	13														> >	Q1: FL1-H- , FL3-H+	0.072	7
> >	Q2: FL1-H+ , FL3-H+	2.31	212														> >	Q2: FL1-H+ , FL3-H+	1.03	100
> >	Q3: FL1-H+ , FL3-H-	3.25	299														> >	Q3: FL1-H+ , FL3-H-	0.8	77
> >	Q4: FL1-H- , FL3-H-	94.3	8671														> >	Q4: FL1-H- , FL3-H-	98.1	9487
																		Data.008		10000
																	>	Lymphocytes	96.4	9636
																	> >	Q1: FL1-H- , FL3-H+	0.15	14
																	> >	Q2: FL1-H+ , FL3-H+	2.19	211
																	> >	Q3: FL1-H+ , FL3-H-	0.97	93
																	> >	Q4: FL1-H- , FL3-H-	96.7	9318
																		Data.009		10000
																	>	Lymphocytes	96.5	9646
																	> >	Q1: FL1-H- , FL3-H+	0.17	16
																	> >	Q2: FL1-H+ , FL3-H+	1.83	177
																	> >	Q3: FL1-H+ , FL3-H-	0.51	46
																	> >	Q4: FL1-H- , FL3-H-	99.3	9034
