# Supplementary material for: Decylubiquinone Inhibits Colorectal Cancer Growth Through Upregulating Sirtuin2
Source: Front Pharmacol. 2022 Feb 1;12:804265. doi: 10.3389/fphar.2021.804265 (PMC8844026; doi:10.3389/fphar.2021.804265)
Supplement: Supplementary file 5 [file Table4.XLSX]

## Sheet: Figure 5A-SIRT2 array
Control group										DUb group
Block Type	96alum									Block Type	96alum
Chemistry	SYBR_GREEN									Chemistry	SYBR_GREEN								dub/dmso-up			up-regulate	表达倍数
Experiment File Name	C:\Documents and Settings\Administrator\Desktop\20140718 qi control.eds									Experiment File Name	C:\Documents and Settings\Administrator\Desktop\20140718Qi DuB.eds							Acly	0.649248			Sirt2	358.036
Experiment Run End Time	2007-06-15 22:41:33 PM GMT+08:00									Experiment Run End Time	2007-06-16 01:34:56 AM GMT+08:00							Acsl4	6.22282			Nol3	159.089
Instrument Type	sds7500									Instrument Type	sds7500							Adm	2.72511			Lig4	22.1663			down-regulate	表达倍数
Passive Reference	ROX									Passive Reference	ROX							ANGPT1	#VALUE!			Ppp1r15a	14.3679			Vegfc	3.76082
																		ANGPT2	#VALUE!			Wee1	13.8642			Igfbp7	3.53128
Well	Cycle	1	2	3	4	5				Well	Cycle	1	2	3	4	5		Apaf1	#VALUE!			Snail3	13.4477			Casp9	3.53128
A1	1	6182.09	967.258	339.843	316.764	0				A1	1	7602.7	1275.23	664.16	527.462	0		Amt	#VALUE!			Ing1	11.9879			Sirt1	3.22692
A2	1	4014.65	595.679	133.559	315.152	97.3435				A2	1	5103.85	875.117	271.763	459.553	503.896		Atp5a1				Bmi1	11.9673			Sox10	2.41174
A3	1	5079.89	949.886	405.253	585.92	302.35				A3	1	6237.79	985.731	588.92	759.269	457.638		Atrx	#VALUE!			Tnks2	10.3375			Tep1	1.75421
A4	1	7497.84	1078.76	29.9078	229.572	0				A4	1	8111.08	1248.71	323.289	363.248	235.734		Aurka	#VALUE!			Ldha	8.56637			Igfbp3	1.1918
A5	1	3559.91	347.409	75.5023	31.4733	16.3738				A5	1	3934.7	629.396	145.37	75.0516	80.7777		Bcl2l11	#VALUE!			Xrcc4	8.21509			Bmi1	1.1918
A6	1	3059.03	327.388	0	0	0				A6	1	4073.37	495.726	88.8995	239.454	0		Birc3	3.64966			Xiap	7.58698
A7	1	2611.53	490.399	124.81	0	110.628				A7	1	3196.94	637.963	178.931	293.587	135.342		Bmi1	11.9673			Acsl4	6.22282
A8	1	3073.11	473.341	133.988	288.147	39.3811				A8	1	3551.44	477.448	158.167	85.182	0		Car9	#VALUE!			Pfkl	4.65981			Cflar	1.95815e+06
A9	1	4238.44	604.004	219.818	132.614	34.3013				A9	1	5407.61	829.442	425.545	323.858	163.711		Casp2	#VALUE!			Skp2	4.64519
A10	1	6193.37	1207.68	593.238	526.224	0				A10	1	6485.67	1029.56	598.279	755.155	563.448		Casp7	#VALUE!			Terf2ip	4.53878
A11	1	4782.13	500.952	223.577	544.063	303.327				A11	1	5522.45	1082.49	486.28	428.554	257.919		Casp9	3.1672			Tek	4.33299
A12	1	4455.71	752.446	325.425	457.901	302.845				A12	1	6027.5	1116.44	377.017	654.395	0		Ccl2				Tinf2	3.67248
B1	1	4855.65	905.795	440.113	267.223	131.117				B1	1	6140.78	841.296	531.478	796.023	260.414		Ccnd2	#VALUE!			Birc3	3.64966
B2	1	8563.4	1756.2	491.974	450.555	0				B2	1	9803.55	1750.4	551.135	819.105	0		Ccnd3	#VALUE!			Hmox1	3.62067
B3	1	3545.66	387.647	241.859	258.762	69.4958				B3	1	4108.92	631.053	388.074	411.169	353.702		Cdc20	#VALUE!			Casp9	3.1672
B4	1	3588.88	466.061	244.183	72.1536	49.6546				B4	1	4377.74	666.385	307.698	404.361	340.28		Cdh2	#VALUE!			Adm	2.72511
B5	1	5441.81	587.484	271.245	1357.61	1613.5				B5	1	6138.24	883.896	390.536	1484.08	1465.49		Cflar	5.10687e-07			Serpinb2	2.49029
B6	1	4220.87	661.387	246.384	263.209	490.809				B6	1	4638.17	704.435	321.979	431.146	206.829		Cox5a	1.08696			Uqcrfs1	1.61555
B7	1	3782.65	488.395	191.731	377.584	0				B7	1	4451.35	655.477	119.147	379.151	0		Cpt2	#VALUE!			Snail2	1.49398
B8	1	3744.55	664.118	306.634	386.227	246.968				B8	1	3863.23	799.798	380.098	613.42	364.087		Dbd2	#VALUE!			Tbx2	1.35737
B9	1	4197.68	724.485	377.102	361.412	600.951				B9	1	4504.72	999.975	390.618	337.598	0		Dkc1	#VALUE!			Gsc	1.3251
B10	1	3109.43	615.423	297.395	275.819	134.384				B10	1	3193.26	523.631	257.81	414.749	213.237		Dsp	#VALUE!			Cox5a	1.08696
B11	1	6842.05	1251.43	320.483	295.991	29.873				B11	1	7244.32	1193.02	495.292	289.856	207.451		E2f4	18.353			Igfbp3	0.839066
B12	1	5237.76	792.508	493.589	216.517	279.83				B12	1	5679.72	1292.61	392.627	487.162	0		Epo	#VALUE!			Acly	0.649248
C1	1	3470.51	483.296	404.039	0	317.676				C1	1	4679.01	652.536	236.052	253.483	0		Ercc3	#VALUE!			Tep1	0.570057
C2	1	4597.28	607.596	93.3624	239.475	244.475				C2	1	5299.16	886.762	390.307	167.515	323.142		Ercc5	#VALUE!			Sox10	0.414639
C3	1	3911.6	710.305	332.587	787.195	335.597				C3	1	4592.12	739.569	316.23	255.122	592.229		Ets2	#VALUE!			Sirt1	0.309893
C4	1	3908.57	668.795	50.3664	215.337	0				C4	1	4303.25	794.071	210.909	269.763	0		Fasl	#VALUE!			Igfbp7	0.283183
C5	1	3503.51	477.507	207.049	317.325	243.699				C5	1	3609.36	467.938	220.643	124.931	145.454		Fgf2	#VALUE!			Vegfc	0.265899
C6	1	3064.73	424.985	185.936	386.243	281.43				C6	1	3505.89	829.691	236.824	261.457	314.904		Flt1	#VALUE!			Cflar	5.10687e-07	1.95815e+06
C7	1	3132.89	469.348	160.107	355.051	164.78				C7	1	4040.09	661.391	270.526	282.019	314.15		Foxc2	#VALUE!
C8	1	2869.34	530.755	300.177	260.017	502.719				C8	1	4049.23	761.872	371.709	337.723	476.347		G6pdx
C9	1	3316.52	620.221	197.375	579.473	220.296				C9	1	3934.21	652.992	497.952	206.545	0		Gadd45g	#VALUE!
C10	1	3557.2	510.163	299.837	226.337	118.853				C10	1	3670.27	657.807	598.354	402.527	276.822		Gpd2	#VALUE!
C11	1	4416.04	748.526	490.008	313.698	16.202				C11	1	4501.86	1035.16	680.098	345.343	206.207		Gsc	1.3251
C12	1	4343.62	798.75	329.662	355.744	0				C12	1	5046	891.136	323.292	230.713	0		Hmox1	3.62067
D1	1	3391.56	553.714	200.841	220.9	153.336				D1	1	4151.27	633.385	132.413	155.652	105.187		Igfbp3	0.839066
D2	1	2770.41	587.634	197.424	186.084	38.0295				D2	1	3389.85	438.931	267.161	222.751	0		Igfbp5	#VALUE!
D3	1	2856.55	464.15	213.445	213.103	52.7632				D3	1	3105.39	543.608	369.771	471.347	120.602		Igfbp7	0.283183
D4	1	2429.51	302.137	208.55	210.172	171.49				D4	1	3039.8	570.806	239.783	219.671	6.2134		Ing1	11.9879
D5	1	4983.24	957.05	73.0199	236.616	254.22				D5	1	5927.49	1069.36	346.572	546.439	285.64		Kdr	#VALUE!
D6	1	3867.35	536.038	283.509	390.499	340.39				D6	1	4265.3	726.371	338.03	424.57	205.683		Krt14	#VALUE!
D7	1	2972.04	346.612	213.153	229.814	127.329				D7	1	3689.49	638.403	374.512	361.479	190.993		Ldha	8.56637
D8	1	2649.45	539.96	116.285	0	42.7669				D8	1	3082.25	517.215	0	0	281.672		Lig4	22.1663
D9	1	2900.34	394.642	157.155	323.265	0				D9	1	2865.21	472.412	273.467	255.484	0		Lpl	#VALUE!
D10	1	2698.81	507.348	255.263	437.081	151.625				D10	1	2727.99	407.904	216.559	394.783	255.867		Map2k1
D11	1	2523.48	524.114	234.78	223.371	11.3596				D11	1	2721.23	566.284	127.558	295	0		Map2k3	#VALUE!
D12	1	4987.79	1195.07	498.649	556.53	354.481				D12	1	4711.65	836.975	408.991	299.256	248.556		Mcm2	#VALUE!
E1	1	5387.29	725.946	317.631	357.526	130.276				E1	1	6513.17	997.59	345.464	324.903	288.124		Mki67	#VALUE!
E2	1	3796.78	568.526	232.745	329.064	193.333				E2	1	4369.61	627.668	329.338	367.571	276.936		Nol3	159.089
E3	1	3865.33	550.513	243.143	198.356	464.486				E3	1	4597.38	872.822	370.269	337.204	220.315		Ocln	#VALUE!
E4	1	3074.6	435.762	319.706	141.081	551.016				E4	1	3664.5	684.608	391.7	366.811	389.405		Pfkl	4.65981
E5	1	6174.62	1168.05	289.084	576.191	102.086				E5	1	6738.21	1343.97	469.622	658.318	531.997		Pgf
E6	1	3820.04	591.965	198.147	512.058	0				E6	1	4232.52	635.412	369.136	362.361	155.017		Pinx1	#VALUE!
E7	1	3732.32	687.267	299.023	24.8474	145.887				E7	1	3938.91	712.51	230.157	109.112	297.803		Ppp1r15a	14.3679
E8	1	3243.82	578.933	109.2	130.416	12.5374				E8	1	3644.61	637.485	253.183	447.678	136.519		Serpinb2	2.49029
E9	1	2818.47	597.942	241.836	194.093	25.0872				E9	1	2870.6	566.137	216.29	267.128	65.8539		Serpinf1
E10	1	3351.25	815.145	347.955	276.662	115.937				E10	1	3145.09	588.665	322.181	400.54	94.664		Sirt1	0.309893
E11	1	3971.68	875.661	350.615	465.863	185.619				E11	1	3755.15	798.043	342.413	280.133	576.025		Sirt2	358.036
E12	1	3323.17	592.003	251.353	103.908	157.913				E12	1	3200.47	650.76	200.116	0	0		Skp2	4.64519
F1	1	4245.92	785.294	226.726	227.374	95.1278				F1	1	4081.88	617.654	150.775	331.807	54.7434		Sic2a1	#VALUE!
F2	1	5240.74	640.532	414.834	529.216	232.649				F2	1	6328.19	912.525	575.48	726.322	122.686		Snail1	#VALUE!
F3	1	5796.79	1114.27	466.027	552.597	224.456				F3	1	6526.79	1141.47	469.471	609.684	137.762		Snail2	1.49398
F4	1	5157.85	1123.46	280.812	400.657	328.516				F4	1	6317.16	1190.59	308.413	363.137	510.217		Snail3	13.4477
F5	1	4348.51	695.673	341.099	122.203	101.878				F5	1	4890.35	636.913	276.506	353.608	196.581		Sox10	0.414639
F6	1	2659.92	515.333	192.609	403.634	78.9258				F6	1	3216.28	499.521	271.828	278.874	261.442		Stmn1	#VALUE!
F7	1	3735.04	534.4	68.5369	104.477	166.703				F7	1	3886.73	504.415	202.003	139.588	0		Tbx2	1.35737
F8	1	3798.08	721.784	341.12	428.893	0				F8	1	4188.53	885.738	343.226	355.158	314.274		Tek	4.33299
F9	1	3339.49	694.059	415.564	328.455	0				F9	1	3564.38	727.199	300.408	495.504	215.605		Tep1	0.570057
F10	1	4880.3	761.603	0	0	0				F10	1	5761.26	1192.89	106.308	247.165	277.079		Terf2ip	4.53878
F11	1	4614.82	846.753	306.925	383.311	280.525				F11	1	4845.97	737.957	309.204	436.385	133.682		Tinf2	3.67248
F12	1	4135.58	854.098	416.928	417.532	222.279				F12	1	3626.93	717.485	299.697	271.881	0		Tnks	#VALUE!
G1	1	8535.23	1241.66	480.524	808.184	412.278				G1	1	9605.99	1509.46	652.736	918.924	391.117		Tnks2	10.3375
G2	1	7528.53	1137.99	704.699	788.321	353.666				G2	1	8903.39	1243.66	771.961	945.129	167.928		Uqcrfs1	1.61555
G3	1	5175.81	792.036	478.603	694.265	321.215				G3	1	5546.51	929.461	469.234	635.311	201.547		Vegfc	0.265899
G4	1	4658.1	738.366	331.585	590.191	338.814				G4	1	5553.32	626.378	378.662	518.961	504.55		Wee1	13.8642
G5	1	4567.28	689.505	281.015	432.697	198.452				G5	1	4643	631.181	298.898	354.109	125.941		Xiap	7.58698
G6	1	6211.81	1136.68	313.099	341.553	0				G6	1	6468.93	1170.72	347.888	248.3	0		Xrcc4	8.21509
G7	1	3219.15	511.358	233.548	254.335	254.466				G7	1	4050.8	761.356	333.093	377.597	228.843		ACTB
G8	1	4748.62	754.836	309.761	182.057	187.823				G8	1	5418.59	902.893	135.748	296.723	181.86		B2M
G9	1	5489.94	833.296	211.551	306.402	51.0722				G9	1	6130.37	956.291	334.361	387.626	249.263		GAPDH
G10	1	5883.49	859.36	293.844	329.96	224.099				G10	1	6102.11	857.406	284.642	408.412	51.2679		Gusb
G11	1	8347.19	1394.34	504.873	598.766	193.421				G11	1	9611.84	1687.6	651.361	848.354	126.861		Hsp90ab1
G12	1	8957.48	1691.38	558.155	637.858	218.693				G12	1	8319.91	1643.54	492.976	506.693	265.612		HGDC
H1	1	7256.24	960.258	287.916	583.522	202.488				H1	1	8415.88	1184.18	561.437	634.743	345.085		RTC
H2	1	8173.46	1236.65	422.607	468.847	0				H2	1	8323.95	1323.11	336.637	449.136	88.5842		RTC
H3	1	6026.57	866.724	496.586	615.762	166.345				H3	1	6390.98	900.731	533.334	391.489	304.834		RTC
H4	1	4007.96	735.28	286.728	369.817	224.98				H4	1	5188.05	1307.59	604.698	404.047	219.694		PPC
H5	1	7427.23	1343.78	278.036	271.049	154.242				H5	1	7968.41	1373.99	312.028	334.729	362.307		PPC
H6	1	4351.16	613.153	338.792	523.836	208.196				H6	1	4853.18	863.596	349.111	571.534	0		PPC
H7	1	3400.35	286.356	0	143.967	198.472				H7	1	3927.51	421.361	0	51.6474	165.002
H8	1	3499.36	560.083	188.595	381.852	80.5762				H8	1	3813.22	721.247	220.847	174.637	85.8836
H9	1	5687.78	1008.96	208.379	279.214	349.438				H9	1	5741.19	946.316	148.424	163.54	149.67
H10	1	6987.6	1210.23	498.717	580.472	452.628				H10	1	6502.81	1173.41	453.242	519.756	367.369
H11	1	4811.67	829.944	266.939	385.875	125.845				H11	1	5046.67	822.58	330.127	331.301	200.644
H12	1	7396.48	1327.79	631.947	600.831	304.55				H12	1	6925.9	1282.24	560.005	681.192	42.0068
A1	2	7063.95	711.756	438.173	445.763	310.525				A1	2	7145.22	1067.63	765.94	604.861	285.971
A2	2	3702.27	759.252	127.752	339.394	276.761				A2	2	4988.15	890.111	261.311	355.205	267.217
A3	2	4802.29	948.606	412.363	576.674	572.819				A3	2	6460.46	999.813	569.961	761.58	332.173
A4	2	7027.06	967.861	142.418	71.1965	394.222				A4	2	8145.82	1181.02	91.1475	287.692	57.2687
A5	2	3137.13	436.517	121.705	150.103	185.57				A5	2	4168.14	637.292	234.395	208.208	0
A6	2	2705.81	349.446	0	150.295	41.9416				A6	2	3800.13	521.267	77.2022	252.191	231.278
A7	2	2634.34	361.697	74.0022	128.37	0				A7	2	3212.15	417.172	97.1969	128.37	57.6676
A8	2	3112.59	509.278	117.869	170.364	168.464				A8	2	3391.22	480.528	142.048	249.236	0
A9	2	4446.11	742.953	372	311.295	304.034				A9	2	5634.9	828.024	505.863	365.736	62.366
A10	2	6381.28	1384.02	527.696	704.281	582.756				A10	2	6612.84	1278.93	529.376	933.213	0
A11	2	5478.9	829.837	430.385	584.24	225.225				A11	2	4806.63	1215.35	521.679	110.487	484.96
A12	2	4543.81	744.296	367.095	0	72.106				A12	2	5744.67	1328.32	396.86	657.904	36.053
B1	2	4588.59	813.253	346.519	371.665	300.477				B1	2	5622.84	970.295	463.511	958.803	277.714
B2	2	9144.05	1593.59	457.723	588.172	0				B2	2	10068.8	1837.51	474.329	601.369	162.736
B3	2	3286.9	446.245	225.369	41.6651	0				B3	2	4116.14	591.612	215.475	382.661	125.507
B4	2	3760.81	576.443	191.959	151.823	112.453				B4	2	4178.36	824.464	433.318	344.233	121.216
B5	2	5130.14	747.706	342.251	1330.39	1673.68				B5	2	5836.22	762.393	480.004	1392.83	1659.04
B6	2	4085.32	572.68	274.382	435.991	146.094				B6	2	4699.31	729.221	368.176	435.991	68.943
B7	2	4101.08	516.67	178.036	427.72	0				B7	2	4672.92	492.251	279.38	385.418	151.214
B8	2	3736.36	587.606	261.916	182.95	412.462				B8	2	3986	678.4	271.499	446.015	375.544
B9	2	3968.09	668.857	441.98	365.614	257.776				B9	2	4750.91	736.405	393.321	254.949	0
B10	2	3306.12	622.725	331.905	80.7025	212.127				B10	2	3256.67	588.303	303.485	333.025	228.786
B11	2	7291.13	980.613	281.636	185.569	0				B11	2	7525.21	1274.44	519.571	446.286	99.5766
B12	2	5832.71	1099.03	418.268	412.552	238.154				B12	2	6087.7	1205.9	451.922	822.178	343.834
C1	2	3953.13	753.732	321.494	243.639	79.7306				C1	2	4622.12	696.155	253.43	559.878	11.2121
C2	2	4753.74	695.178	283.977	179.311	0				C2	2	5169.02	759.495	333.252	292.561	332.824
C3	2	3866.69	444.273	374.841	437.937	0				C3	2	4372.99	494.82	343.491	351.987	463.913
C4	2	3594.88	724.035	100.733	236.634	0				C4	2	4154.31	682.605	303.248	281.594	0
C5	2	3449.71	470.809	224.825	402.278	487.398				C5	2	3523.8	643.056	306.39	168.657	149.281
C6	2	3069.57	528.146	182.022	219.861	238.038				C6	2	3385.72	506.103	232.91	367.228	562.86
C7	2	3049.73	543.02	114.099	152.807	73.4991				C7	2	4106.76	840.191	248.442	296.625	192.046
C8	2	3093.51	631.796	411.307	391.52	217.57				C8	2	3822.88	594.632	388.314	373.587	262.073
C9	2	3624.2	665.13	304.447	35.8585	633.552				C9	2	4130.74	757.374	294.127	0	508.128
C10	2	3591.78	566.847	528.348	266.996	0				C10	2	3883.12	667.034	447.775	393.04	179.032
C11	2	4343.77	1066.35	560.412	273.798	260.705				C11	2	4747.28	999.519	582.941	306.819	306.365
C12	2	4308.5	621.678	324.884	159.266	506.385				C12	2	4607.94	650.549	323.292	479.287	4.42902
D1	2	3513.66	385.409	190.177	183.166	109.632				D1	2	4164.84	733.969	178.624	246.842	185.189
D2	2	2838.66	412.267	272.072	268.585	215.191				D2	2	3448.79	712.75	279.93	233.751	0
D3	2	2715.28	426.359	311.65	157.465	236.896				D3	2	3404.35	641.477	297.621	290.786	229.358
D4	2	2396.25	370.931	234.745	241.044	45.9792				D4	2	3038.97	577.314	242.805	339.599	224.925
D5	2	5109.84	1012.72	272.462	356.885	202.804				D5	2	5889.68	1121.12	390.166	318.974	365.619
D6	2	3869.98	584.593	171.196	144.144	0				D6	2	4189.92	816.682	350.025	355.118	291.142
D7	2	2930.03	417.349	251.003	78.9987	47.7482				D7	2	3836.94	662.277	369.532	193.906	0
D8	2	2488.82	344.15	34.3319	0	20.6461				D8	2	3079.57	517.215	0	0	0
D9	2	2726.89	423.599	200.661	197.087	0				D9	2	2961.81	530.326	116.312	272.168	346.202
D10	2	2659.34	464.992	254.342	351.478	0				D10	2	2686.8	608.633	341.887	149.051	92.6596
D11	2	2633.45	646.608	235.704	120.639	109.809				D11	2	2752.1	600.422	189.488	68.802	0
D12	2	5422.49	1016.02	587.08	611.429	190.874				D12	2	4944.19	726.136	294.768	307.868	119.559
E1	2	5507.75	857.084	383.94	481.362	166.12				E1	2	6362.89	852.401	420.779	477.367	306.735
E2	2	3658.09	605.728	281.501	452.463	217.717				E2	2	4421.87	597.143	367.976	605.618	107.988
E3	2	3831.15	718.725	404.827	477.376	0				E3	2	4846.55	877.527	388.782	476.053	155.764
E4	2	3331.92	601.284	190.359	279.34	0				E4	2	3771.3	582.142	300.181	156.6	564.868
E5	2	6296.6	1154.99	368.831	318.078	80.5185				E5	2	6914.5	1359.04	369.938	657.014	181.167
E6	2	3793.71	677.048	384.223	292.265	70.2213				E6	2	4134.39	713.254	262.519	457.407	0
E7	2	3726.6	683.195	337.08	64.8192	0				E7	2	4211.99	806.968	266.402	90.7469	160.355
E8	2	3265.08	508.67	241.05	171.798	105.872				E8	2	3544.56	555.512	281.494	165.528	0
E9	2	2972.12	552.62	214.587	138.066	0				E9	2	3131.26	490.599	269.936	234.112	182.928
E10	2	3341.24	736.29	280.757	252.918	22.3364				E10	2	3280.3	564.825	347.955	370.603	112.746
E11	2	4148.45	890.966	336.262	267.82	431.766				E11	2	3969.47	761.967	221.441	366.328	268.341
E12	2	3205.63	713.951	197.215	244.44	142.367				E12	2	3282.96	455.643	94.7407	108.167	54.0012
F1	2	4285.05	657.174	241.916	222.527	67.7561				F1	2	4111.02	525.229	234.602	292.59	0
F2	2	5512.6	716.317	401.616	475.214	115.416				F2	2	6522.38	1069.28	532.777	559.817	114.507
F3	2	6130.14	1054.42	461.436	540.038	229.207				F3	2	6608.02	1174.11	416.67	833.463	174.577
F4	2	5144.07	977.989	213.609	412.717	66.8661				F4	2	6193.16	1153.67	415.217	360.457	10.1753
F5	2	4308.82	694.623	352.431	539.512	344.376				F5	2	5009.42	910.775	423.824	392.609	354.42
F6	2	2784.23	439.866	246.198	347.675	0				F6	2	3206.63	407.523	223.675	415.559	0
F7	2	3605.75	509.745	113.266	18.8402	186.854				F7	2	3988.6	553.057	58.4367	265.475	310.508
F8	2	3734.69	689.77	273.738	281.423	291.442				F8	2	4278.96	750.888	281.108	306.001	167.881
F9	2	3359.86	592.743	318.432	455.999	199.111				F9	2	3636.52	681.749	368.5	634.335	267.445
F10	2	4688.74	724.797	0	0	0				F10	2	6048.11	1076.81	68.4066	356.29	464.173
F11	2	4962.43	713.499	379.858	252.838	109.439				F11	2	4984.83	851.814	335.794	407.636	287.451
F12	2	4323.56	756.21	336.568	408.704	140.257				F12	2	3989.62	673.382	227.845	426.359	85.3026
G1	2	8663.19	1256.48	462.007	877.855	322.525				G1	2	9873.68	1375.03	828.65	1066.33	323.985
G2	2	7628.2	912.422	629.158	694.065	150.117				G2	2	9060.35	1161.36	736.778	1095.08	408.793
G3	2	5158.23	850.405	531.695	666.522	402.394				G3	2	5598.52	846.711	473.138	684.555	116.869
G4	2	4736.76	780.125	304.976	533.207	141.61				G4	2	5581.59	954.751	382.755	570.857	318.884
G5	2	4548.86	617.598	264.835	439.169	189.865				G5	2	4828.56	720.665	273.351	232.066	230.892
G6	2	6028.63	998.615	306.96	165.159	0				G6	2	6601.18	1053.46	350.958	398.853	0
G7	2	3333.22	480.819	218.999	360.236	47.7125				G7	2	4100.89	738.629	368.317	335.931	153.74
G8	2	4802.57	900.326	293.362	116.677	233.536				G8	2	5333.24	929.424	220.477	469.727	0
G9	2	5428.98	825.609	213.927	238.044	140.258				G9	2	6216.65	1034.7	351.792	422.207	192.855
G10	2	5859.5	819.647	349.054	342.074	187.63				G10	2	6291.94	864.568	263.171	453.406	114.692
G11	2	8475.83	1478.57	511.005	684.83	281.029				G11	2	9476.52	1742.73	618.657	785.649	211.625
G12	2	9204.6	1949.71	416.78	590.244	174.954				G12	2	8585.1	1690.31	453.501	770.82	128.83
H1	2	7311.98	1217.15	257.816	508.196	143.548				H1	2	8563.3	1276.22	476.37	673.912	35.174
H2	2	8093.41	1204.33	362.881	461.808	0				H2	2	8300.47	1254.99	356.546	480.111	45.3221
H3	2	6182.74	1018.38	371.447	416.848	230.814				H3	2	6183.76	935.657	430.044	667.274	294.487
H4	2	4061.92	669.195	398.504	444.391	127.469				H4	2	5302.4	1163.23	648.436	548.918	206.77
H5	2	7402.1	1456.69	240.558	250.639	288.4				H5	2	8193.83	1393.08	323.358	403.308	372.751
H6	2	4602.17	678.315	416.181	543.919	145.179				H6	2	5176.47	847.109	430.799	367.355	329.444
H7	2	3398.55	181.016	0	0	95.7126				H7	2	3911.28	430.442	0	145.258	126.247
H8	2	3595.25	623.911	202.261	275.574	143.783				H8	2	3949.25	645.718	189.142	290.528	193.962
H9	2	5700.93	994.958	315.858	341.705	283.684				H9	2	5849.64	941.157	141.113	208.746	23.7969
H10	2	7318.76	1291.24	522.971	586.477	218.791				H10	2	6791.66	1134.13	477.495	583.808	161.743
H11	2	5016.06	915.369	275.321	337.916	233.495				H11	2	5084.74	986.065	398.474	352.8	26.2809
H12	2	7552.26	1345.24	546.924	573.794	301.268				H12	2	6990.17	1397.57	542.019	611.346	263.199
A1	3	6275.39	1202.23	417.472	266.598	511.282				A1	3	7349.88	1117.82	717.637	617.761	249.864
A2	3	3834.5	711.543	260.149	293.018	0				A2	3	5143.51	682.918	336.8	357.313	344.52
A3	3	5117	728.417	284.388	724.599	397.991				A3	3	6185.83	928.123	408.808	718.821	384.622
A4	3	7075.7	1032.67	113.934	331.282	0				A4	3	8418.57	1078.76	350.348	431.538	118.533
A5	3	3287.57	367.712	141.989	227.576	0				A5	3	4227.8	482.763	153.258	125.893	138.632
A6	3	3292.29	38.3113	0	0	165.37				A6	3	4108.03	458.575	24.5643	141.38	128.221
A7	3	2804.14	319.536	113.765	0	198.894				A7	3	3352.8	367.245	78.4202	175.914	114.158
A8	3	2953.53	490.796	214.583	185.087	0				A8	3	3398.19	647.892	187.382	18.9293	177.215
A9	3	4418.31	765.639	221.227	381.092	350.809				A9	3	5682.32	1093.16	483.318	450.889	290.002
A10	3	6462.89	1163.15	403.334	674.075	5.26587				A10	3	6711.54	1123.96	586.515	786.951	36.8611
A11	3	4999.87	977.944	238.482	329.786	0				A11	3	5288.38	1361.28	372.628	333.134	50.8572
A12	3	4599.45	785.042	416.703	529.832	70.3034				A12	3	5804.95	953.46	146.838	533.341	293.832
B1	3	4695.41	778.199	345.405	576.787	552.696				B1	3	5783.08	803.438	476.882	950.334	356.931
B2	3	9010.15	1549.45	513.77	565.55	49.4503				B2	3	9465.67	1634.24	545.946	543.871	124.075
B3	3	3538.44	571.328	249.555	373.889	161.811				B3	3	4171.5	618.657	296.827	336.61	21.7823
B4	3	3208.9	478.325	328.87	94.7016	129.978				B4	3	4467.32	557.365	413.558	305.15	246.813
B5	3	5270.81	925.287	286.866	994.19	1330.49				B5	3	5810.02	981.365	485.684	1639.37	1663.92
B6	3	3807.56	666.605	305.18	137.256	564.676				B6	3	4263.4	836.191	365.376	266.439	124.754
B7	3	3969.73	366.296	215.013	53.2692	365.572				B7	3	4481.86	646.481	268.424	87.7374	58.1591
B8	3	3516.39	722.266	322.604	459.168	215.142				B8	3	4269.4	671.259	348.157	351.551	408.643
B9	3	3999.9	622.501	397.376	177.904	154.982				B9	3	4998.49	776.139	470.364	507.097	145.493
B10	3	3196.49	598.734	340.025	204.31	196.578				B10	3	3308.27	661.319	214.165	220.655	42.2032
B11	3	7057.05	1118.68	275.162	84.3496	19.9153				B11	3	7195.77	1093.9	417.599	397.21	131.109
B12	3	5123.01	1084.91	350.961	375.978	11.9077				B12	3	5601.1	1042.56	490.383	383.293	145.869
C1	3	4080.65	792.117	359.146	327.313	113.367				C1	3	4737.87	813.054	208.536	402.374	497.07
C2	3	4531.48	558.332	313.801	80.2182	65.3546				C2	3	5689.58	937.395	313.801	246.553	98.0319
C3	3	3798.63	702.324	328.497	259.215	143.827				C3	3	4481.87	690.353	429.364	542.987	148.057
C4	3	3879.72	549.438	185.726	84.0051	64.0807				C4	3	4430.77	794.071	190.973	308.807	49.8406
C5	3	3283	405.737	188.226	222.377	128.867				C5	3	3486.75	466.981	342.99	306.081	20.4146
C6	3	3237.33	573.995	175.172	311.371	437.642				C6	3	3509.93	485.823	319.028	213.919	307.465
C7	3	3070.71	419.681	159.187	158.425	138.7				C7	3	4263.33	615.864	188.632	385.388	77.0555
C8	3	2924.02	464.556	355.103	161.39	390.638				C8	3	3903.8	725.869	426.635	228.636	219.219
C9	3	3281.43	479.427	313.477	242.403	381.096				C9	3	4171.69	741.595	362.498	295.474	192.96
C10	3	3625.04	511.481	433.245	290.036	374.613				C10	3	4095.96	950.458	505.893	394.395	170.005
C11	3	4256.44	796.051	381.587	379.74	315.203				C11	3	4747.28	827.24	519.578	379.74	190.005
C12	3	4325.14	694.817	332.847	421.237	500.479				C12	3	4696.66	910.383	361.513	52.0964	174.208
D1	3	3531.74	486.989	170.626	330.17	0				D1	3	4239.45	541.763	199.064	215.397	118.521
D2	3	2780.75	626.605	303.503	76.0838	0				D2	3	3615.28	715.827	240.642	294.252	0
D3	3	2681.55	456.398	179.374	202.606	0				D3	3	3402.53	638.57	356.744	303.384	221.821
D4	3	2614.93	328.167	283.105	167.425	6.2134				D4	3	3001.55	549.424	223.663	327.725	0
D5	3	5273.37	911.151	137.321	312.438	215.658				D5	3	5979.36	1096.7	301.888	495.455	87.1202
D6	3	3884.88	714.718	247.525	174.283	140.502				D6	3	4402.92	614.696	314.041	233.251	86.9082
D7	3	3076.69	412.044	178.292	118.498	229.457				D7	3	3836.94	503.118	284.868	439.281	273.226
D8	3	2694.96	523.148	71.9862	121.597	0				D8	3	3209.85	386.675	121.823	118.954	20.6461
D9	3	2810.32	520.398	230.849	78.2093	122.451				D9	3	3058.42	478.203	183.791	247.141	8.90552
D10	3	2636.17	350.816	283.831	159.122	0				D10	3	2815.51	418.953	245.126	244.725	0
D11	3	2391.33	398.608	280.072	47.1247	0				D11	3	2800.33	573.313	252.342	234.681	0
D12	3	5439.67	966.287	544.093	457.496	326.164				D12	3	5101.42	812.818	292.312	148.551	232.825
E1	3	5519.68	784.958	324.999	395.476	113.044				E1	3	6702.81	902.983	360.2	477.367	206.099
E2	3	3794.77	545.633	303.58	184.661	20.9008				E2	3	4220.87	611.452	343.137	412.205	216.846
E3	3	3864.23	381.124	311.026	335.882	136.118				E3	3	4833.32	944.577	462.836	244.638	282.059
E4	3	3116.3	528.094	172.055	135.438	198.55				E4	3	3832.32	619.3	374.617	320.254	115.436
E5	3	6226.26	1252.49	227.058	310.257	70.4537				E5	3	6595.76	1246.46	363.293	567.066	317.76
E6	3	3814.45	500.545	217.257	266.128	127.193				E6	3	4021.89	812.82	226.31	592.847	152.367
E7	3	3753.05	684.824	270.026	158.807	290.569				E7	3	4181.25	685.638	290.867	92.9075	0
E8	3	3351.99	600.89	142.365	238.26	165.773				E8	3	3589.58	608.209	304.952	15.048	33.4332
E9	3	2974.87	575.678	200.11	219.105	0				E9	3	3217.68	640.084	304.849	354.17	56.4462
E10	3	3490.64	663.853	273.393	422.219	0				E10	3	3075.81	695.945	212.639	164.139	81.9003
E11	3	4169.44	638.435	381.371	425.844	648.658				E11	3	4020.29	766.34	247.071	445.34	334.922
E12	3	3637.65	691.779	175.947	177.155	31.0916				E12	3	3040.66	557.636	174.014	0	0
F1	3	4193.46	657.174	275.109	264.388	179.038				F1	3	4442.43	554.55	222.788	339.298	85.256
F2	3	5760.93	867.885	407.717	525.616	209.93				F2	3	6650.66	962.356	545.995	435.613	258.095
F3	3	5805.22	1124.06	400.6	690.747	262.46				F3	3	6794.74	1102.3	407.487	895.116	524.919
F4	3	5323.18	1055.2	254.411	420.757	18.8969				F4	3	6376.2	1332.71	297.612	410.037	261.65
F5	3	4246.98	758.629	470.286	351.008	274.066				F5	3	4931.88	658.948	291.238	395.209	301.329
F6	3	2859.05	525.395	241.538	195.395	203.234				F6	3	3298.35	585.05	267.168	543.988	130.228
F7	3	3639.89	519.74	141.402	321.995	0				F7	3	3966.21	490.422	194.068	169.561	0
F8	3	3688.21	830.44	348.49	249.471	235.034				F8	3	4491.94	654.844	299.007	492.797	304.872
F9	3	3213.04	582.328	347.472	388.276	70.6902				F9	3	3544.87	641.034	393.535	624.177	598.51
F10	3	4718.89	670.06	0	0	57.0194				F10	3	5991.71	996.596	182.11	414.117	173.731
F11	3	4994.69	824.826	306.925	387.734	216.108				F11	3	4810.13	871.211	338.833	554.326	96.9716
F12	3	4114.57	751.907	449.072	317.783	227.2				F12	3	4061.49	516.331	271.334	318.666	108.269
G1	3	8632.3	1206.72	607.368	665.908	348.794				G1	3	10067.8	1380.32	664.772	1207.88	295.526
G2	3	7512.49	941.888	574.314	927.991	163.687				G2	3	9219.61	1154.24	813.353	984.545	231.536
G3	3	5280.57	999.651	524.668	683.861	309.318				G3	3	5624.9	835.628	484.069	569.422	214.143
G4	3	4537.92	696.608	419.598	508.785	115.386				G4	3	5700.9	916.789	547.524	624.788	258.044
G5	3	4449.94	715.072	292.937	409.583	327.256				G5	3	4781.48	770.999	292.937	295.861	147.885
G6	3	6017.95	1147.08	280.357	304.477	0				G6	3	6473.86	1181.13	332.54	265.153	0
G7	3	3349.51	578.829	204.45	245.655	101.61				G7	3	4099.08	668.317	366.785	485.234	152.857
G8	3	4614.95	801.906	300.65	322.875	302.106				G8	3	5500.73	943.973	122.993	390.266	173.91
G9	3	5655.39	824.071	218.681	280.667	135.684				G9	3	6091.58	892.487	395.37	532.383	242.402
G10	3	5838.26	961.571	297.524	347.842	300.736				G10	3	6178.18	885.401	262.557	515.13	177.059
G11	3	8356.38	1450.24	440.827	595.692	265.669				G11	3	9627.71	1619.46	637.053	849.583	275.909
G12	3	8873.97	2000.74	481.959	692.66	172.568				G12	3	8608.79	1535.1	407.6	592.04	177.34
H1	3	7119.6	1016.58	430.566	502.17	142.597				H1	3	8737.7	1250.12	465.901	707.055	539.017
H2	3	8061.39	1262.85	399.983	476.591	90.6443				H2	3	8316.48	1220.93	356.546	577.964	227.984
H3	3	6066.38	868.562	529.361	778.222	301.65				H3	3	6633.92	811.577	414.153	744.938	206.141
H4	3	4171.13	652.513	374.205	397.935	160.365				H4	3	5342.23	1238.3	634.551	515.909	248.477
H5	3	7310.2	1387.51	213.539	247.373	441.838				H5	3	8043.03	1568.01	265.834	524.954	431.395
H6	3	4501.92	730.916	429.08	425.931	51.0519				H6	3	5116.63	779.591	478.953	628.436	119.653
H7	3	3504.34	242.767	0	187.867	19.3774				H7	3	3993.03	417.728	0	96.8388	51.0859
H8	3	3546.19	558.488	224.127	430.986	229.666				H8	3	4017.82	730.821	265.673	278.245	164.53
H9	3	5683.68	1001.59	254.441	230.684	258.634				H9	3	5890.71	1008.96	171.09	211.405	0
H10	3	7192.74	1292.87	501.749	483.059	186.819				H10	3	6888.25	1076.85	388.818	553.116	152.339
H11	3	4751.27	912.423	255.978	388.08	195.085				H11	3	5194.79	874.129	312.718	403.515	226.42
H12	3	7654.65	1478.99	592.706	581.304	262.543				H12	3	7089.29	1313.26	481.522	646.645	169.996
A1	4	5953.34	1033.42	360.544	272.331	183.426				A1	4	7506.39	1491.95	548.579	739.593	418.847
A2	4	3970.03	583.411	318.218	332.016	103.07				A2	4	4773.29	798.782	271.763	387.879	129.791
A3	4	4910.66	846.192	336.526	636.769	179.97				A3	4	6699.46	1065.1	438.431	743.089	311.605
A4	4	7265.05	861.281	38.4529	0	0				A4	4	8189.26	1071.56	226.445	334.188	94.5599
A5	4	3423.74	510.961	108.182	0	16.3738				A5	4	3943.78	586.534	172.416	197.313	0
A6	4	2939.07	164.855	0	34.3896	2.39666				A6	4	4122.69	592.084	0	78.9688	0
A7	4	2693.9	592.473	100.51	14.2633	103.566				A7	4	3392.08	449.348	88.3608	101.032	34.1298
A8	4	3008.1	501.064	102.758	219.791	142.21				A8	4	3427.21	589.366	79.587	209.274	64.5413
A9	4	4866.36	910.26	264.909	277.792	0				A9	4	5183.58	1012.34	397.363	337.817	313.389
A10	4	6662.19	1227.27	539.46	661.357	366.856				A10	4	6497.06	1166.71	544.501	825.106	426.535
A11	4	4741.31	688.264	383.807	286.261	0				A11	4	4822.96	1224.06	314.871	498.864	650.246
A12	4	3635.05	831.221	255.975	368.426	255.976				A12	4	6004.32	1325.61	454.405	322.811	203.699
B1	4	5208.49	786.612	445.684	250.286	206.692				B1	4	6061.47	1041.8	490.252	1026.55	330.525
B2	4	9152.81	1573.85	395.448	443.957	187.911				B2	4	9483.18	1663.28	496.126	753.125	128.571
B3	4	3527.6	290.735	160.507	112.934	0				B3	4	4147.43	396.662	326.51	423.23	0
B4	4	3844.61	512.394	118.563	243.518	30.669				B4	4	4488.99	580.531	352.865	275.086	201.539
B5	4	5121.87	699.64	291.127	1083.84	1511.03				B5	4	5834.85	866.538	482.844	1722.62	1297.95
B6	4	4126.51	700.522	207.187	198.618	19.698				B6	4	4352.44	725.308	484.369	287.431	0
B7	4	3835.72	452.408	284.858	305.514	99.7014				B7	4	4391.64	709.458	217.752	236.578	151.214
B8	4	3465.24	714.105	294.922	405.359	476.113				B8	4	4065.8	740.629	292.793	347.963	95.4773
B9	4	4038.62	826.469	331.147	453.866	408.014				B9	4	4730.17	565.549	290.598	336.197	257.776
B10	4	3051.39	502.769	215.18	298.293	47.7562				B10	4	3424.34	536.148	339.01	342.219	278.763
B11	4	6821.24	1005.39	482.343	55.2107	268.857				B11	4	7488.8	1327.54	440.259	228.511	212.43
B12	4	5609.6	1111.12	362.179	525.199	291.738				B12	4	5824.21	1068.78	399.037	216.517	320.019
C1	4	4121.85	636.834	318.597	402.374	168.182				C1	4	4745.72	882.844	62.2713	342.079	275.32
C2	4	4506.62	871.709	251.56	263.069	152.494				C2	4	5492.17	732.126	366.966	153.358	170.648
C3	4	3806.8	699.664	253.529	417.473	483.654				C3	4	4604.36	442.943	306.689	105.05	234.072
C4	4	4083.57	596.787	151.099	0	386.858				C4	4	4239.95	833.528	220.353	308.807	0
C5	4	3384.43	444.972	147.444	568.436	0				C5	4	3708.15	521.526	295.933	219.879	179.903
C6	4	2975.21	401.179	153.642	168.758	402.928				C6	4	3385.72	474.361	237.803	424.273	0
C7	4	3256.49	509.081	164.708	141.571	97.2085				C7	4	4209.4	723.474	317.454	244.94	0
C8	4	3149.28	515.657	292.513	300.364	146.695				C8	4	4012.05	668.961	390.869	231.624	95.5991
C9	4	3572.72	611.725	385.719	25.8181	160.8				C9	4	3680.35	712.465	270.906	226.626	1.608
C10	4	3836.56	709.218	421.358	399.816	389.658				C10	4	4209.04	643.306	350.031	323.919	194.077
C11	4	4331.73	742.585	290.062	382.492	568.543				C11	4	4772.88	827.24	492.824	403.13	265.124
C12	4	4125.52	889.211	219.775	294.717	296.744				C12	4	4687.42	1022.02	377.439	233.69	429.615
D1	4	3546.44	440.182	154.63	352.968	260.745				D1	4	4222.49	580.603	158.185	275.928	55.5565
D2	4	2812.81	547.638	204.3	316.252	125.219				D2	4	3535.66	659.422	214.122	221.835	174.379
D3	4	2974.13	323.645	227.474	375.818	163.674				D3	4	3305.91	581.399	238.497	438.804	358.574
D4	4	2732.16	354.197	124.929	225.608	264.691				D4	4	3000.72	477.841	399.974	179.299	114.327
D5	4	5188.97	898.455	170.017	359.499	387.042				D5	4	5895.83	1237.33	292.08	456.237	127.11
D6	4	3956.76	633.147	234.44	483.538	389.638				D6	4	4253.91	753.561	331.488	361.67	363.566
D7	4	3158.34	415.581	191.24	254.95	350.154				D7	4	3985.98	614.529	252.995	470.401	15.9161
D8	4	2476.33	484.58	0	40.973	171.068				D8	4	3100.09	547.872	27.687	0	29.4944
D9	4	2696.15	500.541	142.949	88.6372	119.111				D9	4	3119.16	513.779	101.218	293.024	0
D10	4	2601.84	436.448	275.537	263.86	216.908				D10	4	2886.74	490.774	354.788	353.492	347.474
D11	4	2378.79	500.017	172.85	24.5048	175.127				D11	4	2734.74	626.527	164.531	109.329	125.902
D12	4	5191.27	1030.23	474.085	476.872	520.185				D12	4	5122.56	760.24	533.039	222.827	144.729
E1	4	5479.13	799.008	283.248	270.308	86.1616				E1	4	6599.04	950.755	313.538	466.049	223.331
E2	4	3674.17	393.962	249.303	331.689	148.048				E2	4	4199.77	782.201	358.776	436.71	192.462
E3	4	3896.2	735.194	256.72	493.244	261.01				E3	4	4889.54	638.736	425.809	464.152	275.043
E4	4	3033.92	387.344	252.592	95.9351	272.43				E4	4	3664.5	675.6	373.397	179.173	149.298
E5	4	6189.75	1032.35	276.9	375.437	198.421				E5	4	6644.73	1119.8	350.002	548.816	277.501
E6	4	3805.68	753.986	349.02	339.788	160.317				E6	4	4228.53	659.851	430.491	297.018	180.19
E7	4	3557.17	638.409	292.68	132.879	0				E7	4	4227	664.466	277.275	267.919	536.528
E8	4	3184.42	568.686	194.943	175.56	25.0749				E8	4	3677.12	707.747	213.547	142.956	33.4332
E9	4	2892.55	672.685	154.979	173.083	0				E9	4	3103.13	589.196	314.216	226.108	44.9479
E10	4	3185.15	695.945	296.406	272.532	0				E10	4	3320.37	794.973	386.617	372.668	0
E11	4	3965.06	831.933	338.313	325.283	247.156				E11	4	3823.64	753.222	328.061	329.388	218.91
E12	4	3495.36	715.06	262.954	137.125	0				E12	4	3326.26	545.441	145.978	0	0
F1	4	4352.5	662.911	250.355	296.115	62.8202				F1	4	4231.76	634.864	252.043	284.217	194.743
F2	4	5645.59	844.008	449.404	644.419	416.224				F2	4	6440	1071.36	499.224	641.719	263.548
F3	4	5847.42	870.52	528.011	570.865	258.897				F3	4	6648.11	1102.3	483.245	611.967	187.641
F4	4	5165.72	1065.27	243.61	116.579	0				F4	4	6364.39	1270.04	457.219	111.219	63.9588
F5	4	4432.51	779.615	349.032	386.109	327.157				F5	4	5085.11	695.673	256.108	41.601	209.495
F6	4	2923.62	564.926	207.366	325.659	95.6975				F6	4	3288.69	578.582	222.122	320.155	95.6975
F7	4	3729.45	571.715	108.216	226.938	0				F7	4	3926.47	592.371	155.831	180.694	0
F8	4	3534.39	788.724	327.433	565.303	24.1749				F8	4	4464.9	837.231	323.222	337.953	276.668
F9	4	3193.52	641.034	397.54	379.247	329.888				F9	4	3597.48	886.274	477.649	691.899	222.674
F10	4	4700.41	798.409	0	0	0				F10	4	6021.86	1168.36	154.377	459.82	279.751
F11	4	4882.7	767.476	328.957	356.037	160.696				F11	4	4923.01	780.126	328.197	428.276	172.471
F12	4	4394.33	815.373	361.149	431.655	24.6065				F12	4	4240.63	674.458	351.694	285.122	100.887
G1	4	8674.96	1179.2	639.773	803.05	372.144				G1	4	9723.66	1433.25	666.624	1050.2	483.058
G2	4	7479.26	1079.06	652.959	761.758	127.218				G2	4	9078.69	1307.67	663.307	1033.39	285.816
G3	4	5202.92	936.849	515.299	674.151	223.241				G3	4	5586.8	994.479	568.39	775.412	196.648
G4	4	4816.29	816.189	368.428	536.259	176.225				G4	4	5447.27	956.649	361.264	479.275	216.086
G5	4	4584.33	767.005	228.218	315.277	119.262				G5	4	4733.73	599.222	318.483	302.333	183.187
G6	4	6198.67	1006.18	288.542	214.594	0				G6	4	6549.43	1174.51	389.839	337.059	0
G7	4	3379.09	517.75	320.076	279.509	85.7057				G7	4	4095.46	753.543	345.345	265.62	78.6372
G8	4	4935.44	826.725	262.386	295.717	265.337				G8	4	5383.16	912.307	204.078	305.775	181.86
G9	4	5640.35	866.351	274.144	168.079	70.8913				G9	4	6175.49	1037.78	382.693	466.438	228.682
G10	4	5764.93	889.958	234.952	317.846	202.957				G10	4	6286.46	856.755	300.591	427.448	224.099
G11	4	8351.37	1465.55	538.94	611.675	198.541				G11	4	9550.87	1619.46	640.46	928.271	242.345
G12	4	8763.39	1645.66	435.141	603.719	150.301				G12	4	8448.56	1780.68	371.797	518.372	217.102
H1	4	7286.81	1103.13	376.908	673.912	257.626				H1	4	8480.6	1116.87	523.484	685.964	424.94
H2	4	8012.3	1131.85	403.603	383.666	133.906				H2	4	8232.16	1415.68	385.504	570.22	160.001
H3	4	5877.54	825.363	475.73	482.625	110.631				H3	4	6642.09	970.583	319.802	479.455	254.691
H4	4	4079.27	662.779	319.358	345.366	160.365				H4	4	5358.29	1186.97	582.482	577.036	156.253
H5	4	7288.21	1267.45	191.749	244.924	231.362				H5	4	7897.72	1397.85	347.763	383.714	294.023
H6	4	4611.5	645.341	386.946	442.667	0				H6	4	5047.47	716.784	440.258	533.878	395.652
H7	4	3483.91	184.043	0	158.816	203.169				H7	4	4039.31	496.43	0	213.045	273.045
H8	4	3607.51	730.289	198.981	246.735	95.5334				H8	4	4031.76	685.61	238.34	262.757	217.604
H9	4	5653.28	737.743	288.074	351.677	263.018				H9	4	5955.62	983.903	134.532	234.008	10.0197
H10	4	7248.85	1264.23	428.988	251.538	200.611				H10	4	6934.24	1099.76	425.956	513.751	325.366
H11	4	4977.99	747.465	304.981	370.44	241.076				H11	4	5286.64	1005.95	343.668	343.429	107.65
H12	4	7600.19	1396.61	571.45	714.989	355.745				H12	4	7297.35	1316.16	591.071	565.532	231.694
A1	5	6546.27	933.039	384.695	507.395	248.42				A1	5	7358.91	1138.35	916.023	769.693	532.947
A2	5	4338.6	744.258	221.824	139.131	174.646				A2	5	4839.4	643.388	301.959	437.418	374.104
A3	5	5125.91	816.748	362.595	473.821	248.873				A3	5	6282.32	937.084	484.645	740.778	438.098
A4	5	7327.59	887.206	55.543	203.419	83.9053				A4	5	7798.38	1137.81	334.682	155.47	0
A5	5	3181.22	460.204	112.69	0	182.296				A5	5	4182.41	404.934	73.2485	129.525	110.251
A6	5	3258.96	233.351	0	0	0				A6	5	3924.09	386.596	93.5784	263.654	292.393
A7	5	2796.53	383.887	0	249.608	0				A7	5	3506.12	442.691	129.228	210.384	0
A8	5	3149.74	546.242	53.3938	250.288	27.348				A8	5	3204.3	643.785	72.535	76.769	0
A9	5	4374.16	584.154	177.545	480.203	0				A9	5	5360.19	707.507	404.409	230.33	9.3549
A10	5	6221.84	1271.81	394.932	596.175	0				A10	5	6842.51	1131.09	593.238	416.528	372.121
A11	5	5250.27	977.944	318.597	369.963	528.552				A11	5	5032.53	936.562	404.301	222.647	0
A12	5	4757.09	858.386	170.65	405.269	185.673				A12	5	5832.77	776.893	194.461	696.501	405.596
B1	5	5045.02	852.513	403.344	518.45	0				B1	5	6043.67	766.982	347.634	887.292	129.296
B2	5	8882.51	1657.47	523.112	436.416	400.997				B2	5	9868.62	1569.2	568.78	505.225	138.461
B3	5	3433.73	543.156	262.747	405.686	200.189				B3	5	4236.5	528.507	300.125	405.686	276.946
B4	5	3913.96	362.492	149.615	34.5736	0				B4	5	4486.1	602.336	292.172	487.037	0
B5	5	5378.37	894.577	336.571	1213.52	1468.74				B5	5	5850.02	964.007	414.678	1527.31	1143.44
B6	5	4004.25	781.401	223.986	394.006	372.621				B6	5	4634.19	620.947	303.78	658.83	192.055
B7	5	4095.77	357.299	275.272	136.306	177.801				B7	5	4674.25	643.91	204.057	211.51	131.274
B8	5	3996.23	598.828	316.216	562.003	356.448				B8	5	4112.86	806.939	269.369	560.807	541.038
B9	5	3980.53	584.091	168.952	273.16	569.322				B9	5	4571.11	713.889	487.935	488.886	156.564
B10	5	3046.01	596.647	244.615	394.318	4.44244				B10	5	3427.57	382.814	257.81	228.827	0
B11	5	6720.67	1324	323.72	0	0				B11	5	7502.67	1341.71	215.274	446.286	315.326
B12	5	5898.58	973.999	379.807	539.829	101.215				B12	5	5817.84	967.949	463.14	612.976	312.577
C1	5	3872.69	495.509	246.189	436.827	455.959				C1	5	4555.42	1003.23	437.347	237.486	302.727
C2	5	4401.34	816.971	285.274	222.96	176.699				C2	5	5347.41	717.073	479.779	482.489	398.179
C3	5	3949.71	627.836	303.962	485.687	592.229				C3	5	4511.81	602.562	357.122	418.837	404.69
C4	5	3882.51	595.8	83.944	189.307	53.4006				C4	5	4242.74	743.764	328.431	279.228	0
C5	5	3270.65	532.052	190.317	169.906	142.902				C5	5	3691.39	638.271	212.277	171.155	75.2787
C6	5	2954.24	341.223	55.7809	194.904	220.681				C6	5	3338.95	499.931	260.311	228.18	251.675
C7	5	3028.01	524.809	207.035	375.276	411.358				C7	5	4228.87	679.602	327.576	301.119	0
C8	5	3143.81	511.012	219.704	206.22	288.445				C8	5	3914.73	600.439	293.79	542.449	0
C9	5	3396.07	739.168	260.586	418.827	0				C9	5	4050.02	633.572	316.057	236.666	78.792
C10	5	3811.28	692.081	380.411	337.472	37.6118				C10	5	4173.12	711.855	513.818	475.714	513.024
C11	5	4253.43	796.051	387.219	590.248	26.5124				C11	5	4378.4	895.557	437.91	711.325	463.967
C12	5	4602.39	1004.69	372.661	226.247	22.1451				C12	5	4513.67	687.118	501.66	218.805	72.3407
D1	5	3452.61	399.351	263.938	207.536	40.7415				D1	5	4249.62	571.64	183.068	317.592	140.003
D2	5	2710.43	450.212	242.606	195.251	9.27548				D2	5	3621.49	684.035	335.916	291.502	145.625
D3	5	2754.47	515.507	191.399	306.533	26.92				D3	5	3563.86	413.762	346.723	396.813	0
D4	5	2629.89	256.584	311.314	280.229	0				D4	5	3112.97	517.816	202.505	174.549	156.578
D5	5	5072.04	904.315	199.443	299.365	377.045				D5	5	5749.89	1181.66	389.076	360.807	242.794
D6	5	3759.53	580.708	403.455	28.8288	0				D6	5	4152.23	633.147	384.918	364.291	115.878
D7	5	2825.38	366.065	240.046	0	339.543				D7	5	3941.58	565.898	252.995	217.845	245.373
D8	5	2480.79	443.044	32.1169	89.8763	0				D8	5	3100.09	464.801	4.42992	0	204.986
D9	5	2697.61	488.131	190.006	0	0				D9	5	3009.38	468.275	163.37	244.013	0
D10	5	2715.11	544.179	343.73	294.073	223.225				D10	5	2764.89	634.415	350.181	276.952	12.6354
D11	5	2616.09	453.831	236.628	153.626	105.076				D11	5	2680.72	448.81	51.7625	120.639	0
D12	5	5187.31	1016.02	482.683	515.624	246.459				D12	5	4952.12	841.238	537.952	424.125	197.167
E1	5	5287.11	540.478	433.877	300.934	194.381				E1	5	6346.2	996.653	322.543	332.226	335.686
E2	5	3648.04	604.775	196.867	259.05	0				E2	5	4518.34	678.225	386.374	481.344	45.2851
E3	5	3702.16	686.965	415.936	480.02	331.174				E3	5	4903.88	810.478	430.746	290.921	195.056
E4	5	3324.8	660.962	229.407	340.005	120.054				E4	5	3710.27	601.284	283.098	142.492	193.933
E5	5	5893.27	1017.27	341.141	402.812	270.312				E5	5	6690.14	1280.64	359.97	565.762	0
E6	5	3741.85	677.048	349.02	356.421	186.815				E6	5	4311.51	715.065	452.619	684.328	137.793
E7	5	3665.12	634.337	289.961	210.662	217.022				E7	5	4166.95	710.881	280.9	64.8192	271.278
E8	5	3225.69	482.322	176.338	30.096	110.051				E8	5	3689.62	603.086	255.61	204.402	245.177
E9	5	2904.9	562.161	177.971	164.079	102.439				E9	5	2954.97	632.928	262.272	331.159	47.0385
E10	5	3367.11	584.997	196.07	308.664	23.4001				E10	5	3216.03	696.862	244.857	284.92	225.492
E11	5	3965.06	723.705	373.169	326.309	272.376				E11	5	3891.03	759.781	264.499	268.846	287.508
E12	5	3229.34	491.119	341.26	197.596	33.5462				E12	5	3313.89	526.595	127.61	115.832	33.5462
F1	5	4379.98	696.056	236.29	268.354	54.7434				F1	5	4238.42	607.456	232.914	387.329	129.679
F2	5	5845.66	712.164	405.683	639.019	144.497				F2	5	6422.34	950.936	446.353	621.919	356.244
F3	5	5978.23	937.985	417.817	480.668	99.7584				F3	5	6832.72	1032.65	483.245	710.156	359.843
F4	5	5118.48	891.827	296.412	330.978	377.939				F4	5	6268.93	1181.64	324.013	548.056	313.98
F5	5	4301.44	639.012	363.764	403.009	408.947				F5	5	5228.18	854.114	441.956	287.307	271.196
F6	5	2801.73	485.865	262.508	415.559	216.059				F6	5	3312.23	536.895	263.285	287.13	55.248
F7	5	3745.12	509.745	79.3585	213.236	121.822				F7	5	3908	571.715	144.288	156.716	127.317
F8	5	3694.12	765.44	322.169	200.314	89.9844				F8	5	4453.91	741.187	285.32	328.122	12.0875
F9	5	3328.46	470.596	223.303	327.326	122.53				F9	5	3556.75	718.677	422.574	504.533	192.042
F10	5	4614.84	668.172	0	0	59.6922				F10	5	5779.74	1043.78	140.511	277.944	612.068
F11	5	4718.75	920.971	303.886	245.466	338.015				F11	5	4903.3	804.584	259.823	426.802	281.218
F12	5	4235.1	780.951	290.242	394.581	55.7748				F12	5	4367.79	602.386	231.627	336.321	34.4491
G1	5	8611.71	1086.05	604.591	906.456	269.987				G1	5	10248.7	1547.57	771.246	928.458	286.77
G2	5	7577.79	1019.11	623.984	712.917	58.5202				G2	5	9085.56	1317.83	808.179	1077.94	348.577
G3	5	5196.32	781.693	506.711	708.136	244.235				G3	5	5671.05	872.57	423.17	591.616	138.563
G4	5	4617.45	729.825	363.311	468.082	223.428				G4	5	5431.36	760.195	485.096	475.205	270.632
G5	5	4394.68	683.113	317.632	368.902	215.626				G5	5	4733.73	793.37	352.546	305.107	180.325
G6	5	6043.42	1033.6	291.612	316.835	0				G6	5	6545.32	1188.69	298.774	80.8942	0
G7	5	3326.58	607.948	263.411	254.335	20.322				G7	5	4215.56	627.834	343.813	276.904	269.487
G8	5	4882.29	853.255	327.982	205.191	182.854				G8	5	5363.03	1030.41	273.318	146.853	146.084
G9	5	5308.66	918.624	218.681	360.283	145.594				G9	5	6252.28	1058.53	399.331	478.501	180.658
G10	5	5804.68	718.086	291.39	451.099	0				G10	5	6368.7	880.193	264.398	390.529	139.533
G11	5	8104.96	1341.51	582.546	510.856	65.4218				G11	5	9569.24	1628.64	725.627	879.091	162.132
G12	5	8912.34	1831.7	505.828	756.446	331.618				G12	5	8445.17	1649.92	546.221	741.173	272.769
H1	5	7605.03	1092.14	497.31	494.135	305.158				H1	5	8241.48	983.612	447.579	782.381	155.906
H2	5	8041.11	1367.65	437.99	361.843	178.542				H2	5	8359.17	1127.48	344.782	451.952	121.546
H3	5	5994.92	941.172	414.153	597.535	334.282				H3	5	6753.35	954.039	390.317	568.213	134.509
H4	5	3984.19	726.94	336.02	452.949	257.288				H4	5	5286.98	1170.93	579.01	554.419	214.407
H5	5	7353.4	1385.92	255.375	98.786	285.99				H5	5	7888.29	1349.35	316.386	297.991	122.911
H6	5	4658.9	687.736	349.111	556.471	249.676				H6	5	5039.69	628.07	429.94	564.839	139.595
H7	5	3693.08	210.075	0	163.335	117.439				H7	5	4023.68	473.425	0	182.057	197.297
H8	5	3547.3	612.741	169.462	207.749	151.02				H8	5	4115.94	651.037	168.915	193.329	79.1287
H9	5	5663.14	930.102	241.28	271.901	283.684				H9	5	5867.71	849.768	106.017	89.7473	88.9251
H10	5	7339	1118.58	432.777	621.839	220.672				H10	5	6689.55	1108.76	402.46	491.066	290.259
H11	5	4826.57	929.361	327.548	312.559	79.348				H11	5	5158.38	838.045	301.112	351.697	70.7561
H12	5	7697.13	1411.14	611.509	753.292	329.491				H12	5	7141.58	1413.08	474.982	639.885	414.161
A1	6	5823.92	1117.82	326.042	454.362	311.969				A1	6	7166.29	1147.48	617.582	761.093	0
A2	6	4110.51	569.78	233.437	108.564	227.135				A2	6	4641.06	733.353	267.117	369.961	308.254
A3	6	5069.5	956.287	367.335	637.924	271.498				A3	6	6251.15	967.808	539.152	954.575	504.944
A4	6	6948.88	1208.39	55.543	139.487	15.982				A4	6	8312.6	1119.09	219.324	507.094	366.253
A5	6	3039.86	441.028	161.147	153.735	76.4113				A5	6	4060.5	566.231	155.512	25.4207	0
A6	6	2705.81	163.694	0	0	9.58664				A6	6	3982.73	414.459	18.7157	278.938	305.574
A7	6	2735.71	331.741	67.3751	133.124	50.6063				A7	6	3376.87	356.15	40.8669	97.466	0
A8	6	3094.01	482.582	92.6836	170.364	0				A8	6	3525.9	514.412	122.906	349.141	87.5136
A9	6	4451.01	706.089	163.454	83.7564	283.765				A9	6	5415.78	734.446	314.227	422.97	0
A10	6	6111.75	1152.46	477.279	478.53	586.267				A10	6	6629.92	1056.28	388.209	648.638	251.006
A11	6	4431.03	594.608	348.407	170.752	310.592				A11	6	5285.66	596.786	497.458	361.593	154.388
A12	6	4928.64	603.043	333.362	89.4749	236.147				A12	6	5930.13	1371.79	525.839	547.376	403.794
B1	6	5114.62	1024.98	386.631	420.593	153.881				B1	6	5922.27	928.23	427.857	896.702	359.662
B2	6	8947.58	1584.3	542.832	593.828	112.387				B2	6	9603.32	1768.98	480.557	692.799	264.334
B3	6	3360.31	516.111	164.904	134.863	45.639				B3	6	4518.13	670.494	275.939	393.626	198.115
B4	6	3622.11	550.551	101.625	103.721	0				B4	6	4309.84	596.885	434.73	329.201	0
B5	6	5433.54	761.058	293.967	1183.1	1228.02				B5	6	5917.59	937.303	464.383	1658.58	1663.92
B6	6	3909.89	663.996	83.9946	235.758	8.2075				B6	6	4558.44	628.774	383.575	414.998	302.036
B7	6	3570.36	544.946	136.951	153.541	53.1741				B7	6	4448.69	561.654	288.967	252.245	0
B8	6	3727.15	705.944	189.517	63.3747	499.028				B8	6	4325.67	518.236	262.981	498.628	572.864
B9	6	4168.63	566.873	229.775	182.107	419.084				B9	6	4615.37	813.225	490.638	120.471	234.055
B10	6	3345.88	563.269	255.78	150.168	65.526				B10	6	3484.53	588.303	238.525	300.336	63.3048
B11	6	6413.77	1136.38	386.845	308.26	499.543				B11	6	7793.97	962.913	427.31	332.798	197.494
B12	6	5624.48	1042.56	427.884	396.459	181.592				B12	6	5958.08	959.883	403.845	738.79	324.484
C1	6	4159.12	678.708	279.497	335.926	343.838				C1	6	5155.74	636.834	167.988	450.363	0
C2	6	4565.11	593.912	256.747	406.99	133.13				C2	6	5429.3	712.968	386.417	369.24	81.0881
C3	6	3808.16	478.858	328.497	392.916	303.165				C3	6	4634.31	634.486	368.026	487.052	314.446
C4	6	3696.34	504.063	137.458	0	68.8274				C4	6	4254.84	841.42	265.473	181.025	8.30676
C5	6	3342.98	555.975	230.054	331.067	28.07				C5	6	3624.35	533.009	289.659	401.029	67.6232
C6	6	2936.5	419.695	82.2034	207.977	261.594				C6	6	3280.88	501.694	354.258	438.534	202.084
C7	6	3085.69	409.748	167.469	176.402	247.763				C7	6	4177.18	630.764	230.039	155.054	14.2256
C8	6	3174.43	481.977	212.04	149.435	397.231				C8	6	4063.45	506.366	383.205	283.926	349.431
C9	6	3411.28	623.862	210.275	205.111	165.624				C9	6	3810.2	801.068	201.245	40.1615	176.88
C10	6	3718.16	465.342	433.245	422.857	28.5849				C10	6	4169.13	750.084	426.641	608.534	22.567
C11	6	4247.41	898.528	494.233	539.341	251.868				C11	6	5072.5	947.538	454.807	529.71	262.178
C12	6	4186.51	619.753	307.366	151.824	0				C12	6	4434.19	741.01	227.738	504.591	113.678
D1	6	3451.48	525.829	143.966	175.305	100.743				D1	6	4071	590.562	223.058	239.767	239.264
D2	6	3149.93	550.715	209.211	78.8338	257.858				D2	6	3456.03	578.405	261.268	236.501	60.2906
D3	6	2872.05	386.63	203.424	125.972	132.446				D3	6	3387.03	569.771	256.535	321.23	93.6816
D4	6	2757.94	435.077	195.453	53.4334	2.48536				D4	6	3122.11	405.328	298.217	368.097	0
D5	6	5140.61	918.964	153.669	28.7599	202.804				D5	6	5800.88	987.324	427.221	332.047	108.543
D6	6	3870.85	600.13	101.409	374.774	0				D6	6	4331.92	809.884	334.759	669.614	215.822
D7	6	2876.91	513.729	213.153	179.542	90.1911				D7	6	3787.79	551.75	280.884	450.053	135.287
D8	6	2475.43	417.332	44.2992	0	247.753				D8	6	3193.79	372.83	57.589	5.28684	120.927
D9	6	2785.44	435.181	138.509	138.691	37.8485				D9	6	2999.14	575.002	115.424	33.3693	107.979
D10	6	2571.81	448.418	206.422	225.59	230.596				D10	6	2742.57	377.518	176.933	301.123	161.101
D11	6	2536.02	505.037	163.606	203.578	0				D11	6	2943.1	613.475	186.715	203.578	0
D12	6	5322.08	1060.07	361.091	483.331	271.629				D12	6	4784.32	761.661	367.232	432.737	241.215
E1	6	5297.84	843.97	256.233	392.147	109.598				E1	6	6403.45	1009.77	445.338	488.02	245.388
E2	6	3635.98	599.051	216.186	266.927	69.6694				E2	6	4522.36	558.033	373.495	547.856	627.025
E3	6	3842.18	446.998	280.17	320.014	287.672				E3	6	4735.19	828.122	403.593	321.336	122.085
E4	6	3133.59	429.006	205.002	297.681	6.1566				E4	6	3910.63	485.306	251.372	186.227	181.62
E5	6	6182.63	1158	209.336	552.726	215.674				E5	6	6642.06	1103.72	405.382	282.881	34.5079
E6	6	3793.71	711.444	282.635	179.399	292.81				E6	6	4341.03	611.878	304.763	763.929	98.0448
E7	6	3694.43	746.71	332.549	125.317	4.82272				E7	6	4127.64	701.924	384.199	240.911	388.229
E8	6	3028.73	578.933	177.147	238.26	94.7274				E8	6	3537.69	628.702	249.947	186.846	29.254
E9	6	2881.58	582.835	155.831	261.125	102.439				E9	6	3016.71	635.314	290.373	348.167	34.4949
E10	6	3433.05	641.847	385.696	535.774	225.492				E10	6	3297.83	814.229	200.672	226.078	146.782
E11	6	3972.79	872.382	333.187	463.811	348.036				E11	6	3850.16	760.874	290.129	223.696	391.414
E12	6	3278.83	678.475	261.987	220.592	112.093				E12	6	2999.41	492.227	97.6409	124.349	0
F1	6	4400.8	602.356	243.604	371.465	61.4741				F1	6	4390.81	583.871	184.531	361.331	99.615
F2	6	5543.2	782.758	469.738	738.022	252.643				F2	6	6460	862.694	588.698	543.616	291.72
F3	6	6084.78	997.834	447.661	557.164	92.6328				F3	6	6828.5	1145.82	452.253	753.542	382.407
F4	6	5124.39	785.524	201.608	384.577	354.681				F4	6	6369.32	1217.45	260.411	466.317	315.433
F5	6	4235.9	762.827	333.167	516.112	0				F5	6	5037.11	814.241	407.959	354.908	470.647
F6	6	2790.86	513.896	194.939	409.138	134.174				F6	6	3387.05	612.362	132.807	324.742	90.7646
F7	6	3652.77	497.085	101.002	231.22	183.191				F7	6	3886.73	533.734	107.495	140.445	147.468
F8	6	3679.76	614.099	333.75	344.098	0				F8	6	4391.37	631.561	324.275	576.363	432.462
F9	6	3289.42	695.952	338.46	326.197	147.271				F9	6	3807.1	806.737	369.502	537.266	408.825
F10	6	4572.06	700.26	0	0	189.768				F10	6	5889.61	917.321	123.871	554.955	236.987
F11	6	4975.87	841.693	359.346	415.008	166.237				F11	6	5028.73	782.657	362.385	439.333	116.366
F12	6	4179.81	807.843	337.513	459.02	104.988				F12	6	4137.79	875.612	199.483	273.647	0
G1	6	8847.04	1141.1	611.997	770.048	396.224				G1	6	10092.8	1363.39	748.1	1061.2	238.61
G2	6	7297.09	1021.14	639.506	587.814	278.183				G2	6	9032.86	1272.11	781.274	1047.1	284.12
G3	6	5156.03	741.795	504.368	616.585	307.219				G3	6	5753.83	816.418	455.961	605.487	386.998
G4	6	4618.34	665.289	429.832	394.817	0				G4	6	5532.99	890.215	500.447	590.191	300.003
G5	6	4584.33	696.696	301.452	232.991	19.082				G5	6	4694.16	854.89	324.444	377.223	154.564
G6	6	6155.95	1067.65	194.408	455.03	0				G6	6	6618.43	958.897	390.862	332.565	0
G7	6	3310.89	629.965	311.652	411.451	0				G7	6	4287.98	688.913	358.362	357.632	181.131
G8	6	4711.58	764.25	321.605	324.886	164.966				G8	6	5428.26	872.939	192.234	98.5723	0
G9	6	5581.77	965.516	260.675	259.758	138.734				G9	6	6044.87	976.278	338.322	511.474	168.462
G10	6	5765.61	802.72	249.062	383.607	159.089				G10	6	6210.39	940.087	385.248	343.228	98.3075
G11	6	8519.27	1493.88	506.236	586.471	196.834				G11	6	9563.4	1663.1	589.359	927.042	296.958
G12	6	8880.74	1730.71	564.581	600.126	167.797				G12	6	8432.76	1632.91	504.91	724.104	74.7531
H1	6	7892.69	1099.01	427.948	690.986	401.173				H1	6	8358.34	1055.05	543.115	731.16	377.407
H2	6	8153.18	1265.47	399.983	394.93	249.272				H2	6	8402.93	1325.73	391.839	451.952	191.589
H3	6	6080.67	973.341	398.262	598.328	325.527				H3	6	6598.19	928.304	479.703	501.644	353.384
H4	6	4050.36	779.551	291.588	481.067	45.8184				H4	6	5362.15	1306.95	572.068	602.709	185.036
H5	6	7220.66	1451.12	161.243	308.604	176.735				H5	6	7937.78	1546.54	357.35	292.276	306.073
H6	6	4517.46	642.201	394.684	692.033	230.531				H6	6	5035.03	734.841	430.799	428.441	204.208
H7	6	3635.38	205.837	0	156.879	70.4633				H7	6	4116.25	418.333	0	140.093	0
H8	6	3533.92	586.678	201.168	252.076	11.5798				H8	6	4088.07	650.505	210.461	178.91	176.11
H9	6	5551.4	937.472	244.936	200.103	230.454				H9	6	5817.59	772.382	94.3187	168.858	94.5612
H10	6	7412.59	1179.95	484.317	471.717	332.889				H10	6	6902.97	1089.94	455.515	584.475	252.017
H11	6	4941.58	823.316	257.912	359.966	176.385				H11	6	5131.07	865.292	356.563	386.426	230.463
H12	6	7294.09	1369.47	633.582	678.939	217.911				H12	6	7314.78	1355.9	555.917	529.483	366.247
A1	7	6236.26	702.631	369.169	475.862	288.86				A1	7	7867.56	1268.39	564.104	601.994	454.955
A2	7	3740.29	612.036	275.247	361.529	27.6761				A2	7	5231.11	909.194	356.544	535.442	201.367
A3	7	4943.32	638.805	334.156	494.622	294.122				A3	7	6181.38	890.998	545.077	763.891	320.861
A4	7	7232.05	803.671	84.0266	0	114.537				A4	7	8324.76	1172.38	287.684	451.88	114.537
A5	7	3068.39	366.584	209.603	93.2093	0				A5	7	4199.27	519.985	119.451	196.103	0
A6	7	2824.44	485.277	0	0	68.3048				A6	7	4081.37	513.14	93.5784	270.022	0
A7	7	2712.9	473.757	41.9714	64.1849	81.2054				A7	7	3345.2	503.713	131.437	61.8077	0
A8	7	3071.95	427.136	69.5127	357.554	0				A8	7	3523.57	586.286	6.04458	177.725	110.486
A9	7	4949.75	778.4	205.727	383.883	134.087				A9	7	5476.28	901.753	298.727	575.127	110.7
A10	7	6819.73	1246.87	512.571	709.051	0				A10	7	7075.97	1287.84	463.835	745.616	389.674
A11	7	4882.84	818.947	501.185	390.051	79.9185				A11	7	4760.36	786.276	285.06	383.355	119.878
A12	7	4316.62	926.296	347.253	310.531	21.6318				A12	7	6314.97	1056.68	587.353	721.062	585.861
B1	7	4879.93	856.72	345.405	352.847	305.94				B1	7	5873.72	740.341	451.255	933.398	319.598
B2	7	8917.55	1648.18	464.988	402.483	312.885				B2	7	9818.56	1840.99	459.799	578.747	270.628
B3	7	3652.77	482.305	213.276	280.691	230.27				B3	7	4265.38	377.505	434.247	542.743	98.5388
B4	7	3799.82	377.482	91.7449	57.1216	0				B4	7	4585.8	624.14	282.292	225.48	99.3092
B5	7	5240.47	575.467	186.037	1293.57	1208.5				B5	7	5814.16	786.427	360.713	1519.3	1419.94
B6	7	4224.86	657.473	372.376	385.932	196.98				B6	7	4464.08	832.277	179.188	570.017	80.4335
B7	7	3867.56	400.998	272.533	173.908	212.696				B7	7	4660.98	570.651	212.274	344.683	131.274
B8	7	3663.72	542.72	306.634	295.35	62.3785				B8	7	3992.14	680.44	219.328	418.513	150.218
B9	7	4295.88	541.708	337.905	228.334	33.2104				B9	7	4589.09	626.474	323.037	240.941	37.9548
B10	7	3212.61	479.821	377.58	278.883	188.804				B10	7	3496.36	572.656	204.015	443.353	182.14
B11	7	6611.44	1216.03	403.031	295.991	146.046				B11	7	7369.16	1070.89	477.487	570.51	136.088
B12	7	5860.34	986.098	456.73	531.051	141.404				B12	7	6102.57	1103.06	358.973	375.978	229.223
C1	7	3807.95	504.233	262.119	125.511	221.751				C1	7	4975.25	676.963	243.293	98.44	140.774
C2	7	4658.7	721.178	325.472	182.85	211.797				C2	7	5429.3	700.652	329.362	475.411	311.039
C3	7	3912.96	573.299	343.491	166.443	0				C3	7	4502.29	667.74	421.186	420.201	200.23
C4	7	3994.21	642.162	197.268	50.8763	116.295				C4	7	4191.55	634.271	216.156	273.312	206.482
C5	7	3342.98	638.271	153.718	78.7065	81.6582				C5	7	3696.68	478.464	227.963	169.906	150.557
C6	7	2776.81	453.2	133.091	306.618	0				C6	7	3184.1	473.479	296.519	344.648	181.008
C7	7	3036.25	483.42	171.149	140.447	160.038				C7	7	4094.78	569.508	245.682	467.409	404.245
C8	7	3029	343.771	421.525	34.37	207.681				C8	7	3927.85	591.147	410.029	381.059	0
C9	7	3641.74	585.023	202.535	220.888	572.448				C9	7	4121.38	663.916	201.245	321.292	0
C10	7	3776.69	837.089	398.903	208.718	7.52235				C10	7	4197.06	665.716	495.326	393.04	359.568
C11	7	4075.77	726.248	451.99	313.698	61.8622				C11	7	4414.54	993.579	436.502	554.476	257.759
C12	7	3818.69	777.579	320.107	363.187	41.3375				C12	7	4330.68	908.458	377.439	290.252	252.454
D1	7	3514.79	603.508	254.162	194.172	160.003				D1	7	4283.54	636.372	215.949	272.784	122.965
D2	7	2940	606.094	196.442	124.667	219.829				D2	7	3615.28	544.562	189.567	207.168	60.2906
D3	7	2563.97	467.057	195.408	357.972	0				D3	7	3507.34	624.035	269.562	396.813	23.6896
D4	7	2432.84	369.072	109.816	77.1816	306.942				D4	7	3150.38	478.771	275.045	89.0557	137.937
D5	7	5021.92	898.455	204.892	135.956	154.246				D5	7	5795.61	1082.05	301.888	635.333	0
D6	7	3930.46	703.065	159.201	421.949	173.816				D6	7	4116.29	649.655	333.669	473.054	265.07
D7	7	3110.77	452.718	267.936	100.544	248.026				D7	7	3723.57	511.076	431.287	438.084	21.2214
D8	7	2401.37	557.761	45.4067	109.702	115.028				D8	7	3082.25	629.953	0	11.8954	0
D9	7	2644.19	482.34	133.182	30.2409	239.336				D9	7	3122.09	435.181	189.118	140.777	0
D10	7	2625.01	486.17	268.165	256.81	0				D10	7	2620.72	580.089	331.75	218.541	0
D11	7	2570.75	491.984	177.471	165.879	92.7698				D11	7	2871.72	579.337	144.195	72.572	0
D12	7	5467.42	1163.81	385.655	624.347	246.459				D12	7	4747.32	977.655	341.44	390.755	326.164
E1	7	5471.97	885.185	334.003	440.749	181.284				E1	7	6489.32	739.059	302.077	388.152	208.166
E2	7	3607.84	598.097	204.226	192.537	60.9608				E2	7	4460.06	766.938	378.095	354.444	193.333
E3	7	3739.65	681.083	304.855	346.461	157.167				E3	7	4744.01	859.883	449.26	429.77	183.83
E4	7	3118.34	457.156	295.301	469.8	163.15				E4	7	3696.03	628.308	191.579	385.151	492.528
E5	7	6060.65	1210.27	225.95	379.348	0				E5	7	6472	1254.5	372.154	258.113	0
E6	7	3771.37	666.187	233.35	468.1	0				E6	7	4100.08	656.23	275.595	548.888	13.2493
E7	7	3638.67	565.936	245.561	198.779	34.9647				E7	7	4239.87	768.696	287.243	279.803	250.781
E8	7	3080.63	552.584	200.605	211.926	47.3637				E8	7	3637.1	661.638	250.756	338.58	34.8262
E9	7	2891.87	554.21	197.556	101.048	79.4428				E9	7	2875.41	533.536	222.25	118.057	56.4462
E10	7	3302.01	590.499	276.155	503.772	26.591				E10	7	3174.3	664.77	310.214	239.498	161.673
E11	7	4194.85	829.746	338.313	446.367	150.311				E11	7	3725.32	821.001	289.104	335.544	285.49
E12	7	3270.59	618.61	228.151	137.976	0				E12	7	3267.49	636.348	213.65	124.349	0
F1	7	4364.99	664.185	267.795	270.117	194.743				F1	7	4185.13	578.772	264.42	332.688	88.3971
F2	7	5819.77	779.643	466.688	638.119	30.8987				F2	7	6567.1	845.046	500.241	378.911	122.686
F3	7	5936.03	1070.74	425.852	558.306	115.197				F3	7	6656.54	1149.09	436.183	705.589	184.078
F4	7	4911.81	1106.67	418.817	443.537	40.7011				F4	7	6066.2	1174.93	435.618	556.096	0
F5	7	4324.51	735.545	489.551	514.812	33.0027				F5	7	4860.81	823.685	320.701	263.906	302.764
F6	7	2751.64	526.833	264.061	363.27	137.134				F6	7	3176.46	645.424	299.011	318.32	107.536
F7	7	3683.55	429.119	127.695	0	10.9914				F7	7	3899.04	554.39	159.438	280.033	112.662
F8	7	3685.67	781.933	213.727	213.832	0				F8	7	4213.89	868.275	344.279	503.857	291.442
F9	7	3099.32	757.499	356.484	353.286	54.1958				F9	7	3713.75	745.19	321.437	602.731	430.032
F10	7	4500.11	654.96	0	0	194.222				F10	7	5876	1165.53	140.511	358.156	341.225
F11	7	4834.32	824.826	318.321	440.807	165.544				F11	7	4969.6	656.15	376.059	370.779	158.618
F12	7	4291.49	827.206	355.476	248.047	140.257				F12	7	4322.46	597.008	262.825	346.913	171.425
G1	7	8570.53	1337.98	606.442	753.18	205.774				G1	7	9703.07	1419.49	740.693	1036.26	463.356
G2	7	7452.91	963.225	667.446	711.203	184.042				G2	7	9185.24	1428.58	678.829	978.547	298.538
G3	7	5097.42	879.22	506.711	550.695	339.41				G3	7	5616.84	949.409	438.785	712.991	319.815
G4	7	4774.76	792.463	354.1	663.456	270.632				G4	7	5652.29	791.514	387.872	332.745	298.954
G5	7	4537.94	731.051	349.14	98.004	259.515				G5	7	4597.29	790.174	200.968	281.993	77.2819
G6	7	6160.06	973.082	383.7	221.335	0				G6	7	6570.79	1012.8	386.77	297.735	0
G7	7	3262	529.114	349.939	274.3	16.7877				G7	7	4150.98	680.391	360.659	465.269	199.685
G8	7	4815.45	898.614	243.253	326.898	102.358				G8	7	5355.78	860.958	174.924	384.231	246.455
G9	7	5313.41	764.111	227.397	357.871	89.1858				G9	7	6213.49	940.148	336.738	469.655	109.767
G10	7	5801.25	921.207	327.583	344.381	109.935				G10	7	6178.86	1013	236.179	366.302	131.605
G11	7	8289.56	1454.83	544.391	627.044	233.812				G11	7	9269.37	1595.72	639.097	760.445	309.473
G12	7	8977.79	1771.11	492.058	572.276	306.965				G12	7	8400.03	1678.62	523.27	669.302	305.374
H1	7	7623.01	1023.45	424.022	540.335	359.345				H1	7	8430.26	987.733	433.183	879.802	81.7557
H2	7	7976.01	1152.81	338.447	568.108	184.722				H2	7	8333.56	1100.41	383.694	511.086	74.8502
H3	7	6002.07	886.944	300.931	481.04	117.795				H3	7	6563.49	933.819	427.064	470.737	208.528
H4	7	4127.45	622.358	317.97	300.743	219.106				H4	7	5197.69	1232.53	565.125	562.366	239.078
H5	7	7414.67	1284.14	209.181	308.604	387.211				H5	7	7867.09	1385.92	286.752	312.686	395.244
H6	7	4487.15	724.635	421.341	566.513	154.751				H6	7	5003.95	741.907	416.181	635.967	110.081
H7	7	3535.6	241.556	0	171.082	25.2493				H7	7	3959.37	332.366	0	85.2181	115.677
H8	7	3607.51	652.101	238.34	292.664	76.7162				H8	7	4055.73	701.035	220.847	307.084	110.491
H9	7	5705.04	941.894	225.195	356.995	283.684				H9	7	5774.87	934.524	106.748	182.819	110.217
H10	7	7185.38	1084.21	463.095	656.534	209.388				H10	7	6925.96	1184.86	485.075	587.144	243.868
H11	7	4858.01	970.6	272.097	374.85	148.083				H11	7	5133.56	874.129	344.957	380.362	94.0046
H12	7	7502.15	1478.99	550.194	705.977	323.584				H12	7	7055.53	1353.96	593.523	439.358	167.371
A1	8	6302.48	803.007	319.142	365.497	381.295				A1	8	7307.75	1355.07	548.579	607.728	701.93
A2	8	4242.74	587.5	211.371	289.855	248.13				A2	8	5201.36	714.27	264.795	539.658	400.826
A3	8	5321.86	739.938	368.519	689.929	309.548				A3	8	5931.98	1071.5	498.864	545.472	394.906
A4	8	7167.77	815.193	84.0266	226.666	0				A4	8	8484.58	1149.34	287.684	85.7264	234.402
A5	8	3113.78	354.176	84.5175	147.682	63.3122				A5	8	4060.5	515.473	242.283	325.627	0
A6	8	2763.12	235.673	0	85.3372	0				A6	8	4164.01	602.533	0	273.843	0
A7	8	2913.11	442.691	148.004	168.783	54.1369				A7	8	3376.87	489.29	74.0022	135.502	30.5991
A8	8	3365.68	490.796	34.2526	240.823	76.5744				A8	8	3429.53	535.974	86.639	123.041	95.171
A9	8	4516.42	754.296	259.273	505.33	0				A9	8	5602.2	915.931	442.454	399.239	31.183
A10	8	6273.09	1275.37	443.668	785.361	96.541				A10	8	6736.21	1195.21	430.223	427.656	730.201
A11	8	4520.84	890.822	398.712	395.073	30.8776				A11	8	5233.94	864.686	324.186	122.205	332.388
A12	8	4585.54	641.073	317.488	426.322	0				A12	8	5786.4	939.878	436.546	463.164	304.648
B1	8	5164.79	685.656	401.116	465.758	5.46322				B1	8	5629.32	832.883	455.712	828.014	365.125
B2	8	8744.85	1551.78	385.068	465.636	140.259				B2	8	9749.74	1678.38	545.946	493.914	264.334
B3	8	3467.43	326.795	235.263	236.833	0				B3	8	4306.3	731.345	372.683	291.656	211.599
B4	8	3489.19	460.61	296.407	0	94.9279				B4	8	4640.7	591.434	330.282	378.806	36.5107
B5	8	5110.83	620.863	279.766	1171.9	1289.82				B5	8	5754.86	1036.11	532.549	1632.97	1701.33
B6	8	4299.28	744.875	174.989	179.241	31.1885				B6	8	4484.01	819.232	233.785	507.041	402.168
B7	8	3577	529.523	91.7572	390.118	0				B7	8	4588	726.166	162.972	354.083	0
B8	8	3327.12	499.873	300.245	345.572	145.125				B8	8	4212.1	684.521	250.204	459.168	138.76
B9	8	4153.42	467.538	298.708	145.685	0				B9	8	4752.3	782.762	270.324	353.007	297.313
B10	8	3064.28	582.044	293.335	181.836	0				B10	8	3516.78	547.622	220.255	90.918	0
B11	8	6659.99	959.372	362.566	424.816	136.088				B11	8	7190.57	1123.99	511.478	489.228	81.3209
B12	8	5237.76	820.74	298.076	80.4622	311.088				B12	8	5596.85	955.849	392.627	172.628	209.873
C1	8	4194.44	593.215	204.192	386.377	181.885				C1	8	4651.55	673.474	160.747	237.486	416.094
C2	8	4446.67	673.282	235.999	160.436	326.773				C2	8	5148.55	640.439	383.823	520.239	357.03
C3	8	3978.29	778.144	361.211	436.573	125.496				C3	8	4483.23	549.356	268.523	413.38	194.59
C4	8	3885.3	543.52	104.93	172.743	0				C4	8	4010.96	642.162	244.487	160.911	0
C5	8	3278.59	429.661	86.7931	308.58	109.728				C5	8	3662.28	574.157	216.46	394.782	0
C6	8	2953.44	453.2	52.845	451.607	188.447				C6	8	3363.95	610.145	239.76	278.095	574.018
C7	8	2959.09	490.87	169.309	65.1676	192.046				C7	8	4202.65	554.609	249.363	426.96	337.859
C8	8	3140.53	375.129	275.908	156.907	388.989				C8	8	3965.03	818.78	403.643	470.72	324.707
C9	8	3619.52	518.267	196.085	322.727	136.68				C9	8	4140.1	622.649	328.958	98.9695	167.232
C10	8	3768.71	541.801	306.442	319.853	392.667				C10	8	4033.44	732.947	532.311	459.45	109.826
C11	8	4175.14	714.367	429.461	328.833	220.937				C11	8	4678.02	692.089	642.08	705.821	253.341
C12	8	4227.18	821.847	374.254	513.522	183.066				C12	8	4393.53	918.082	398.142	260.482	82.675
D1	8	3260.42	580.603	127.97	272.784	84.446				D1	8	4060.83	543.755	202.619	382.054	285.19
D2	8	2730.08	446.11	269.126	321.752	53.7978				D2	8	3468.44	787.615	285.823	284.168	25.0438
D3	8	2646	426.359	180.376	280.289	173.365				D3	8	3153.69	485.468	333.696	213.103	232.589
D4	8	2596.63	513.168	183.363	317.038	260.963				D4	8	3124.61	390.454	322.397	402.532	0
D5	8	5115.12	832.048	250.665	260.147	34.2768				D5	8	5717.36	1065.45	374.908	385.645	774.084
D6	8	3938.35	570.997	204.999	212.285	330.251				D6	8	4203.07	724.429	383.828	517.608	0
D7	8	2922.89	385.518	278.892	31.1207	92.8438				D7	8	3860.72	533.182	385.469	428.508	355.459
D8	8	2530.76	473.701	0	136.136	75.2107				D8	8	2846.66	419.31	0	260.377	293.469
D9	8	2656.63	438.491	226.409	209.601	0				D9	8	2912.05	447.591	150.052	238.799	115.772
D10	8	2684.22	397.775	266.322	201.42	38.9592				D10	8	2863.57	486.17	295.81	148.044	300.091
D11	8	2581.36	624.519	222.764	264.841	0				D11	8	2821.55	617.491	226.461	66.917	71.944
D12	8	4960.05	1104.12	577.254	609.276	274.775				D12	8	4956.08	672.138	277.573	417.666	0
E1	8	5523.25	771.844	239.86	440.083	137.169				E1	8	6507.21	921.717	357.744	473.372	139.237
E2	8	3660.1	485.537	129.711	332.565	45.2851				E2	8	4552.51	694.441	443.411	466.466	3.48347
E3	8	3565.45	630.502	296.215	729.948	408.354				E3	8	4737.4	859.883	364.098	390.099	268.026
E4	8	3081.72	379.462	192.799	25.3946	0				E4	8	3632.97	594.528	341.67	117.097	277.047
E5	8	5905.73	950.929	171.678	230.737	44.5727				E5	8	6740.89	1188.16	324.527	415.848	158.161
E6	8	3550.37	704.203	299.734	105.738	15.8992				E6	8	4232.52	694.246	333.932	476.416	135.143
E7	8	3636.52	624.566	244.655	37.8112	0				E7	8	4150.51	580.594	347.954	156.646	81.9862
E8	8	3273.83	628.702	198.178	183.084	0				E8	8	3527.68	477.931	242.667	168.036	0
E9	8	2808.19	680.636	222.25	115.055	70.0351				E9	8	3082.56	629.748	239.281	74.0355	63.7633
E10	8	3358.76	551.988	292.724	234.337	0				E10	8	3040.75	635.428	335.068	114.588	231.874
E11	8	4218.05	904.085	266.549	474.072	359.133				E11	8	3893.24	752.128	263.474	429.948	169.478
E12	8	3288.11	633.022	203.983	162.676	0				E12	8	3208.72	422.384	130.51	128.608	0
F1	8	4379.15	699.881	221.1	262.185	133.269				F1	8	4324.19	632.315	187.907	287.742	86.6022
F2	8	5804.47	723.584	499.224	352.811	80.882				F2	8	6316.42	926.021	507.358	593.118	274.453
F3	8	5759.86	980.423	521.124	537.755	331.34				F3	8	6773.64	1190.44	500.463	822.046	150.825
F4	8	5120.45	883.994	372.016	125.959	241.299				F4	8	6224.65	1219.69	398.417	286.758	63.9588
F5	8	4304.21	755.482	325.234	470.611	319.983				F5	8	4748.19	860.41	406.826	300.307	0
F6	8	2748.02	596.55	246.198	221.081	0				F6	8	3156.54	553.426	260.955	301.808	161.798
F7	8	3719.93	474.43	95.2302	184.976	0				F7	8	3943.26	721.64	115.431	147.296	62.2848
F8	8	3576.65	703.352	407.449	364.989	487.527				F8	8	4109.94	690.74	345.332	364.989	362.624
F9	8	3232.56	524.568	296.403	428.91	567.878				F9	8	3731.57	792.534	318.432	581.286	212.071
F10	8	4293.96	628.535	0	0	72.1652				F10	8	5880.86	898.446	151.604	236.905	285.097
F11	8	4791.32	835.79	392.773	356.037	274.291				F11	8	4921.22	695.788	314.522	435.647	96.9716
F12	8	4374.43	842.265	284.57	309.839	0				F12	8	4240.63	762.664	294.969	247.165	140.257
G1	8	8369.02	1364.45	572.185	924.791	326.174				G1	8	9764.84	1329.51	723.101	1032.6	380.901
G2	8	7345.21	1078.04	650.889	634.941	374.02				G2	8	9102.75	1272.11	739.882	1097.65	239.17
G3	8	5325.26	780.215	410.678	680.393	315.617				G3	8	5533.32	897.691	441.127	601.326	145.562
G4	8	4689.03	638.715	359.217	626.823	209.792				G4	8	5613.41	914.891	506.588	640.052	141.61
G5	8	4376.26	671.129	252.913	343.939	101.134				G5	8	4533.85	592.831	265.687	288.465	81.0983
G6	8	6170.74	1095.07	227.15	292.118	0				G6	8	6388.42	1112.09	353.004	165.159	0
G7	8	3192	482.95	272.6	359.368	103.377				G7	8	4156.41	564.625	376.74	532.108	52.1303
G8	8	4668.9	786.501	371.713	356.067	405.459				G8	8	5430.67	909.74	152.147	131.765	301.113
G9	8	5448.78	930.924	199.666	395.668	87.6613				G9	8	6162.82	1003.18	327.23	279.059	208.863
G10	8	5789.6	857.406	304.272	494.94	58.1389				G10	8	6252.19	861.964	251.515	325.922	0
G11	8	8383.11	1435.69	472.169	633.806	302.647				G11	8	9316.15	1731.25	670.439	773.969	216.745
G12	8	8686.65	1679.68	361.699	778.008	96.2248				G12	8	8488.05	1739.22	489.304	601.024	256.069
H1	8	7912.47	1250.12	277.447	651.817	258.576				H1	8	8942.66	1203.41	566.671	766.311	340.332
H2	8	8152.11	1256.73	368.31	553.324	155.194				H2	8	8365.58	1429.66	352.926	532.205	316.568
H3	8	6063.31	962.311	479.703	535.721	127.346				H3	8	6670.67	863.047	370.454	572.968	230.814
H4	8	3927.02	664.704	304.085	438.278	93.3991				H4	8	5229.17	1273.59	648.436	553.808	224.98
H5	8	7380.89	1332.65	281.522	344.526	118.091				H5	8	7866.3	1494.86	287.623	280.846	129.338
H6	8	4550.88	668.894	368.028	350.619	240.901				H6	8	5084.77	781.947	457.456	547.267	130.023
H7	8	3564.45	202.81	0	74.2431	54.609				H7	8	3991.22	369.296	0	187.222	146.799
H8	8	3612.53	627.634	201.715	232.316	91.6735				H8	8	4153.29	668.058	185.862	311.356	0
H9	8	5668.07	1026.65	301.966	168.858	274.916				H9	8	5901.4	843.135	149.886	80.4402	139.024
H10	8	7405.24	1336.24	497.959	603.157	168.639				H10	8	6968.28	1221.68	460.821	547.779	147.951
H11	8	4847.25	907.268	293.375	317.52	45.4861				H11	8	5250.23	911.687	286.927	237.589	173.353
H12	8	7647.03	1393.7	496.238	616.603	315.051				H12	8	6986.9	1467.36	564.91	569.288	345.244
A1	9	6395.78	987.79	414.022	394.163	391.405				A1	9	7741.15	1555.83	705.562	613.461	583.497
A2	9	3786.56	554.786	197.435	261.397	111.659				A2	9	4842.7	733.353	299.636	512.254	206.139
A3	9	5474.76	870.516	468.055	520.047	626.296				A3	9	6029.96	885.878	533.227	716.509	175.856
A4	9	6898.5	894.408	15.666	185.983	27.9684				A4	9	7794.91	1149.34	222.172	158.376	0
A5	9	3487.28	392.527	119.451	0	0				A5	9	4310.8	610.221	210.73	54.4729	57.8543
A6	9	2907.08	184.591	0	0	113.841				A6	9	4018.72	392.401	94.7481	238.18	0
A7	9	2783.86	416.063	102.719	0	44.7218				A7	9	3215.95	410.515	174.513	0	0
A8	9	3565.37	450.752	114.847	66.2527	451.789				A8	9	3304.15	501.064	57.4235	145.125	288.795
A9	9	4434.66	655.047	162.045	131.218	0				A9	9	5383.08	888.992	418.5	529.061	0
A10	9	6424.93	1170.27	495.765	543.712	542.385				A10	9	6578.68	1287.84	307.542	705.871	347.547
A11	9	4708.65	1008.44	335.365	331.46	305.143				A11	9	5536.06	1115.16	400.575	241.062	9.08165
A12	9	4455.71	771.46	206.367	275.442	448.86				A12	9	5243.93	1222.38	347.253	503.516	292.029
B1	9	5221.44	935.241	355.433	279.455	185.75				B1	9	5774.99	803.438	466.854	971.035	334.167
B2	9	8489.57	1702.77	526.225	462.809	35.0647				B2	9	9519.48	1637.73	416.206	517.479	113.286
B3	9	3267.64	481.178	252.853	190.782	214.711				B3	9	4236.5	643.448	237.462	271.92	276.946
B4	9	3665.46	478.325	151.026	156.333	93.4675				B4	9	4604.58	596.885	330.282	587.751	48.1942
B5	9	5103.94	652.908	268.405	1437.65	1319.1				B5	9	5985.16	889.237	445.921	1541.71	2015.25
B6	9	3909.89	517.89	202.987	571.632	316.81				B6	9	4400.29	737.048	170.789	437.605	0
B7	9	4009.53	526.952	260.207	386.985	310.736				B7	9	4391.64	658.048	224.6	134.74	151.214
B8	9	3552.2	496.813	309.828	554.828	469.748				B8	9	4171.18	617.191	294.922	453.189	263.517
B9	9	4091.18	993.353	446.035	44.8262	232.473				B9	9	4699.74	712.565	340.608	383.825	273.591
B10	9	3211.53	442.27	258.825	187.965	157.707				B10	9	3116.95	467.304	326.83	281.948	79.9639
B11	9	6953.02	895.65	360.948	289.856	268.857				B11	9	7173.23	764.666	443.496	283.722	194.174
B12	9	5516.11	792.508	471.153	196.035	192.011				B12	9	5832.71	625.134	560.896	497.403	398.907
C1	9	3849.15	764.201	275.152	198.111	277.811				C1	9	4839.88	802.585	282.393	225.182	24.9158
C2	9	4627.99	555.595	264.527	248.912	353.399				C2	9	5356.19	795.075	251.56	423.505	267.47
C3	9	3775.5	546.696	279.427	167.808	335.597				C3	9	4469.62	554.677	199.007	551.173	1.41007
C4	9	3602.33	764.479	83.944	149.079	0				C4	9	4183.17	763.492	209.86	404.644	236.149
C5	9	3259.18	481.335	141.169	81.2052	0				C5	9	3688.74	378.943	287.567	196.142	95.6933
C6	9	3152.64	402.942	196.701	217.485	209.523				C6	9	3255.88	508.748	308.263	387.431	184.727
C7	9	3145.62	494.181	178.51	215.727	199.159				C7	9	4032.6	653.114	298.131	184.267	0
C8	9	3142.72	488.945	335.943	64.257	323.059				C8	9	4044.86	600.439	467.51	539.46	212.626
C9	9	3747.03	555.893	344.438	258.181	529.032				C9	9	3699.07	592.305	184.474	451.817	141.504
C10	9	3702.2	717.128	376.448	451.318	0				C10	9	3931.01	457.433	577.22	555.677	448.332
C11	9	4164.6	692.089	385.811	470.548	111.941				C11	9	4459.71	787.14	440.726	524.206	0
C12	9	3857.51	552.389	259.589	192.013	413.375				C12	9	4221.63	642.85	361.513	401.887	215.546
D1	9	3399.47	630.397	121.749	278.286	122.965				D1	9	4258.67	497.944	277.268	236.622	158.521
D2	9	2815.91	413.293	135.545	157.668	228.177				D2	9	3439.48	799.921	278.948	303.418	222.612
D3	9	2616.84	395.351	242.506	234.099	0				D3	9	3449.01	694.772	224.468	124.923	0
D4	9	2614.09	325.378	181.348	54.6209	37.2804				D4	9	3216.9	550.354	214.595	138.927	18.6402
D5	9	4949.83	928.729	107.895	330.739	219.943				D5	9	5770.99	1125.02	299.709	607.881	568.424
D6	9	3695.54	463.207	342.392	365.602	0				D6	9	4161.87	672.961	251.887	458.64	157.883
D7	9	2914.17	371.37	188.252	161.588	149.876				D7	9	3724.37	568.55	291.841	235.799	17.2424
D8	9	2267.51	370.852	0	5.28684	101.756				D8	9	3068.86	601.274	0	70.0506	0
D9	9	2531.48	470.757	83.4606	72.9953	85.7156				D9	9	3070.13	536.944	172.249	0	215.959
D10	9	2721.12	430.923	297.654	138.98	54.7534				D10	9	2847.27	544.179	276.458	303.137	155.837
D11	9	2578.47	503.029	115.541	380.767	0				D11	9	2845.67	611.466	156.212	161.166	0
D12	9	5138.42	1004.65	408.991	405.825	318.823				D12	9	4772.43	639.455	422.501	306.791	189.826
E1	9	5640.14	772.781	357.744	408.126	312.25				E1	9	6554.91	948.881	353.651	492.014	209.545
E2	9	3700.3	571.388	159.149	209.166	265.615				E2	9	4655.02	713.519	398.334	521.601	331.801
E3	9	3950.22	496.403	397.422	185.132	415.371				E3	9	5009.71	885.761	309.792	577.876	346.61
E4	9	3096.98	490.936	233.068	138.259	0				E4	9	3651.28	684.608	207.443	90.2918	455.588
E5	9	5850.53	914.741	320.096	189.022	235.804				E5	9	6463.98	1286.67	317.881	559.244	31.6323
E6	9	3761	706.013	195.129	298.206	261.011				E6	9	4303.53	747.65	371.148	430.081	0
E7	9	3695.86	701.11	157.666	184.735	8.43976				E7	9	4187.69	772.768	251.904	87.5059	176.029
E8	9	3141.9	597.23	217.592	137.94	69.6525				E8	9	3607.09	621.383	277.45	305.976	0
E9	9	2773.89	642.47	143.058	217.104	0				E9	9	3133.31	641.675	182.228	319.153	51.2197
E10	9	3499.83	656.518	218.162	164.139	127.637				E10	9	3114.2	673.022	243.937	258.08	91.473
E11	9	4012.56	728.078	404.95	275.003	312.728				E11	9	4060.07	806.789	285.003	270.898	198.734
E12	9	3420.09	677.367	238.785	65.5814	119.457				E12	9	3361.32	574.265	123.743	186.524	0
F1	9	4300.88	611.28	263.294	331.807	161.089				F1	9	4202.62	566.661	246.417	384.685	35.8973
F2	9	6018.67	661.295	363.996	580.517	288.085				F2	9	6490.6	840.893	416.867	588.618	320.801
F3	9	5886.45	1128.41	412.078	718.148	289.774				F3	9	6662.87	1042.45	398.304	480.668	147.262
F4	9	4995.46	969.037	345.614	357.777	328.516				F4	9	6148.87	1116.74	298.812	246.558	313.98
F5	9	4090.98	914.972	356.964	78.0018	208.061				F5	9	4949.42	758.629	311.635	445.91	134.881
F6	9	2741.99	477.959	169.31	417.394	0				F6	9	3227.14	590.081	242.315	228.42	113.456
F7	9	3569.93	495.752	39.6793	177.269	214.333				F7	9	3842.51	551.058	77.9156	149.009	52.2093
F8	9	3553.83	596.636	279.003	159.76	0				F8	9	4373.62	706.262	326.38	372.363	85.9552
F9	9	3137.51	516.046	326.443	673.84	302.79				F9	9	3764.67	674.174	259.352	523.721	604.401
F10	9	4436.9	704.034	0	0	143.439				F10	9	5726.26	926.759	149.755	471.945	235.205
F11	9	4697.25	865.308	443.674	419.43	301.997				F11	9	4928.39	833.259	250.706	539.584	204.333
F12	9	4071.45	832.584	311.042	301.894	95.9654				F12	9	4471.73	620.673	381.002	258.64	109.909
G1	9	8269.01	1224.72	576.815	852.92	176.586				G1	9	10144.3	1337.98	728.657	874.188	254.664
G2	9	7449.47	1067.88	587.766	736.909	179.801				G2	9	8721.22	1402.16	768.856	973.405	221.359
G3	9	5216.84	834.15	552.775	623.52	331.012				G3	9	5444.68	827.501	457.523	569.422	242.136
G4	9	4774.76	712.742	317.257	363.272	264.338				G4	9	5628.43	804.8	497.377	595.278	183.568
G5	9	4478.59	742.237	288.679	424.376	160.288				G5	9	4663.46	667.933	344.03	269.049	294.816
G6	9	5875.02	1026.04	354.027	248.3	0				G6	9	6567.5	984.43	344.818	475.253	0
G7	9	3286.14	502.126	155.443	175.344	141.37				G7	9	4004.33	753.543	379.803	402.77	28.274
G8	9	4687.42	905.461	223.21	142.829	46.7072				G8	9	5254.32	845.553	149.414	92.5373	249.437
G9	9	5614.23	928.617	236.905	300.772	63.2686				G9	9	5943.54	914.78	302.668	429.445	327.015
G10	9	5875.27	936.181	230.658	276.889	173.888				G10	9	6272.07	886.052	318.995	456.868	173.359
G11	9	8372.25	1294.03	523.269	536.676	212.763				G11	9	9495.74	1667.69	688.153	732.166	162.701
G12	9	8825.45	1791.31	445.239	662.115	244.141				G12	9	8289.45	1654.17	435.141	740.275	71.5721
H1	9	7621.21	1070.16	424.022	631.73	269.033				H1	9	8192.94	1386.12	513.014	554.396	150.202
H2	9	8096.61	1367.65	456.994	463.216	214.937				H2	9	8182	1150.19	357.451	448.432	24.7212
H3	9	6102.1	909.003	360.522	442.208	211.712				H3	9	6585.94	861.209	551.211	400.998	233.202
H4	9	4061.28	760.945	253.404	443.78	126.882				H4	9	5322.32	1290.27	579.01	562.366	269.624
H5	9	7169.61	1308.79	293.724	372.284	212.082				H5	9	7926.78	1505.99	327.716	484.949	202.442
H6	9	4364.37	713.644	340.512	430.952	237.71				H6	9	5073.89	763.89	451.436	528.857	240.103
H7	9	3487.51	207.653	0	122.662	268.935				H7	9	3822.32	354.766	0	255.654	117.439
H8	9	3471.48	706.886	148.689	326.31	103.253				H8	9	4091.41	637.208	235.06	270.234	100.358
H9	9	5546.47	996.432	252.248	194.785	232.332				H9	9	5738.72	839.45	138.188	136.948	156.558
H10	9	7257.13	1272.42	499.475	506.412	132.905				H10	9	6845.93	1183.23	472.19	527.095	132.905
H11	9	4809.19	871.92	264.36	331.301	116.748				H11	9	5337.11	930.834	297.244	346.736	73.7886
H12	9	7616.52	1276.43	539.567	613.599	254.667				H12	9	7435.7	1365.59	519.946	516.715	328.835
A1	10	6167.04	782.476	381.245	558.995	314.857				A1	10	7286.68	1393.86	539.953	551.828	519.948
A2	10	3941.93	486.63	196.273	171.805	335.931				A2	10	5105.5	823.318	329.832	659.817	32.4478
A3	10	5413.9	917.882	459.761	567.429	283.838				A3	10	6021.05	903.8	484.645	808.962	282.81
A4	10	7101.76	1078.76	0	466.41	0				A4	10	7980.79	1192.54	178.023	427.179	185.124
A5	10	3169.55	341.769	9.0152	0	0				A5	10	4060.5	664.363	141.989	72.6306	343.851
A6	10	2679.15	192.718	0	0	0				A6	10	3888.1	400.528	0	45.8528	0
A7	10	2720.51	341.726	0	209.195	0				A7	10	3476.98	504.823	78.4202	236.533	0
A8	10	3178.76	490.796	253.872	226.1	191.436				A8	10	3377.29	499.01	72.535	74.6657	336.927
A9	10	4581.83	690.493	248	4.18782	76.3983				A9	10	5320.94	891.828	504.454	417.386	193.335
A10	10	6035.83	1132.87	436.946	496.018	347.547				A10	10	6550.21	1109.71	630.21	524.634	210.635
A11	10	4539.9	609.854	186.314	264.498	205.245				A11	10	5261.16	683.908	294.376	770.058	292.429
A12	10	4247.07	594.894	382.97	391.233	400.188				A12	10	5944.04	1189.79	347.253	996.505	405.596
B1	10	4776.34	943.654	347.634	325.56	308.672				B1	10	5794.41	764.177	571.59	1054.78	398.815
B2	10	8658.51	1686.51	471.216	376.091	267.931				B2	10	9519.48	1641.21	557.363	334.617	0
B3	10	3424.1	543.156	213.276	200.65	235.456				B3	10	4362.87	494.7	288.032	517.524	78.831
B4	10	3533.98	546.463	83.2761	210.448	2.92086				B4	10	4094.56	684.101	345.808	239.009	140.201
B5	10	5303.9	654.243	49.7046	1235.93	1384.16				B5	10	5805.88	753.047	413.258	1485.68	1338.62
B6	10	3788.95	720.09	102.193	232.528	241.301				B6	10	4696.65	700.522	337.378	222.84	346.357
B7	10	3896.75	494.821	241.034	180.175	63.1442				B7	10	4420.83	561.654	331.421	325.882	63.1442
B8	10	3637.12	641.674	235.299	393.402	302.981				B8	10	3860.16	677.38	320.475	460.364	286.432
B9	10	3997.13	647.666	235.182	205.921	204.007				B9	10	4968.06	733.756	366.289	329.193	0
B10	10	2993.35	396.374	231.42	117.478	270.989				B10	10	3407.15	530.933	239.54	202.267	0
B11	10	6725.88	936.362	569.747	291.39	212.43				B11	10	7168.03	1085.05	325.339	377.273	96.2574
B12	10	5346.12	885.27	461.537	416.941	485.238				B12	10	5662.73	1226.07	461.537	317.46	410.815
C1	10	3968.82	647.302	344.664	205.493	203.064				C1	10	5118.47	828.756	305.564	201.802	166.936
C2	10	4554.88	628.123	322.878	310.256	245.685				C2	10	5217.27	740.337	342.329	392.833	0
C3	10	3937.46	462.896	332.587	231.929	266.503				C3	10	4372.99	638.477	321.682	289.229	492.114
C4	10	3716.82	584.949	175.233	0	166.135				C4	10	4306.97	775.329	203.564	104.119	39.1604
C5	10	3448.82	691.859	181.952	16.241	0				C5	10	3474.4	685.16	271.882	159.912	306.218
C6	10	2871.17	529.909	181.043	154.497	280.19				C6	10	3238.94	544.016	232.91	475.376	495.912
C7	10	3181.58	477.626	72.6924	148.313	72.3137				C7	10	3983.91	661.391	191.393	198.874	284.513
C8	10	2987.44	516.819	269.521	185.299	229.108				C8	10	3748.52	715.416	481.561	419.912	379.1
C9	10	3192.52	594.733	238.656	222.323	368.232				C9	10	4003.23	543.755	354.758	458.989	136.68
C10	10	3885.78	711.855	256.249	414.725	204.608				C10	10	4372.66	694.718	347.389	607.179	347.533
C11	10	4072.76	686.149	426.645	181.615	347.607				C11	10	4712.65	828.725	490.008	451.285	0
C12	10	4286.32	685.193	245.256	436.122	177.161				C12	10	4628.27	896.91	291.44	315.556	0
D1	10	3493.31	479.022	213.283	0	82.9644				D1	10	4039.35	646.331	119.083	222.472	130.373
D2	10	2885.19	438.931	228.855	167.751	239.307				D2	10	3483.95	514.821	272.072	172.334	0
D3	10	2853.82	371.126	261.545	305.483	205.669				D3	10	3402.53	517.445	214.447	342.225	189.517
D4	10	2483.56	371.861	89.6666	0	27.339				D4	10	3142.07	524.324	310.307	394.22	172.733
D5	10	5094.02	908.221	174.376	381.723	184.238				D5	10	5759.56	1005.88	307.338	607.881	369.904
D6	10	3635.94	739.966	291.142	380.016	634.43				D6	10	4179.4	530.212	357.658	478.296	425.85
D7	10	2995.82	495.16	212.157	16.7573	285.163				D7	10	3665.7	685.267	318.734	289.662	290.468
D8	10	2497.74	380.741	56.4815	22.4691	51.6152				D8	10	2860.05	572.595	70.8787	0	0
D9	10	2636.14	317.699	197.997	160.59	120.225				D9	10	2863.74	501.369	147.388	122.006	0
D10	10	2683.36	592.98	311.476	416.939	50.5416				D10	10	2679.07	403.3	249.734	255.803	146.36
D11	10	2532.16	403.628	174.698	166.821	0				D11	10	2700.01	626.527	146.968	111.214	0
D12	10	5147.67	974.813	573.569	521.007	178.289				D12	10	4997.04	777.292	254.237	385.373	141.583
E1	10	5554.26	724.072	239.86	351.534	281.232				E1	10	6143.44	766.224	255.414	394.81	66.8614
E2	10	3451.07	487.444	277.822	187.286	0				E2	10	4388.7	719.243	380.855	553.107	362.281
E3	10	3742.95	605.8	338.179	445.639	221.718				E3	10	4686.68	752.838	356.692	524.981	363.45
E4	10	2970.86	560.748	224.526	342.827	0				E4	10	3488.55	619.3	370.956	379.508	123.132
E5	10	5742.8	1151.97	304.59	302.435	0				E5	10	6469.33	1273.6	322.312	646.586	379.587
E6	10	3935.73	632.696	238.379	468.1	484.924				E6	10	4246.08	769.373	334.938	547.7	178.866
E7	10	3645.1	554.536	270.026	313.293	176.029				E7	10	4044.71	705.181	273.651	347.863	0
E8	10	3148.15	491.105	107.583	411.312	117.016				E8	10	3658.36	624.311	265.316	229.482	105.872
E9	10	2939.2	555.8	176.268	271.13	153.659				E9	10	3137.43	457.203	257.163	127.061	274.914
E10	10	3384.64	614.339	319.419	246.724	229.746				E10	10	3140.08	780.302	306.532	473.835	46.8002
E11	10	4028.03	843.958	263.474	461.758	375.274				E11	10	3863.42	602.359	256.297	434.053	411.59
E12	10	3302.55	607.524	229.118	229.961	0				E12	10	3370.6	609.741	277.455	219.74	0
F1	10	4372.49	579.409	234.04	353.84	67.3074				F1	10	4185.13	571.76	272.296	282.014	121.153
F2	10	5616.17	882.419	333.494	588.618	245.372				F2	10	6159.89	974.814	438.219	603.918	145.406
F3	10	5825.27	868.344	438.479	643.936	302.838				F3	10	6783.14	1179.55	462.584	516.062	74.8188
F4	10	5127.34	982.464	190.808	89.7793	353.227				F4	10	6258.11	1061.91	297.612	544.036	193.33
F5	10	4187.9	692.525	377.362	399.109	495.041				F5	10	4784.19	709.313	293.504	500.512	344.376
F6	10	2619.49	590.081	148.34	196.313	31.5703				F6	10	3234.38	453.522	277.264	266.949	224.938
F7	10	3593.43	513.743	77.9156	137.019	0				F7	10	3919.75	531.068	55.551	179.838	207.005
F8	10	3367.9	644.173	240.048	330.579	233.691				F8	10	4130.22	858.574	272.686	380.965	65.8094
F9	10	3113.74	584.221	327.445	294.593	148.449				F9	10	3539.77	856.921	314.427	670.454	205.002
F10	10	4446.63	704.978	0	0	113.148				F10	10	5612.49	1149.48	244.97	361.886	290.443
F11	10	4802.07	809.645	369.222	578.652	308.231				F11	10	4884.49	776.753	321.36	428.276	160.696
F12	10	4227.36	793.859	242.026	336.321	0				F12	10	4298.13	588.402	253.371	381.34	70.5387
G1	10	8482.28	1291.41	555.52	825.051	353.902				G1	10	9741.31	1430.07	789.764	1039.93	347.335
G2	10	7366.98	1142.05	694.351	892.86	100.078				G2	10	9037.44	1207.08	729.534	1266.46	342.64
G3	10	5131.86	819.374	507.491	700.507	280.626				G3	10	5571.42	872.57	445.031	698.426	133.665
G4	10	4724.38	738.366	363.311	386.677	337.765				G4	10	5692.06	925.331	505.565	564.751	115.386
G5	10	4372.17	649.557	235.882	361.505	196.544				G5	10	4777.39	803.757	238.437	404.96	0
G6	10	6033.56	1028.88	260.916	0	0				G6	10	6574.89	1043.06	329.47	333.688	0
G7	10	3375.46	562.494	301.698	257.808	322.501				G7	10	4131.67	810.361	395.117	545.128	397.604
G8	10	4680.98	713.756	223.21	169.987	241.486				G8	10	5287.34	839.562	199.522	164.958	32.7944
G9	10	5475.69	801.009	160.842	490.564	169.987				G9	10	6121.66	912.474	384.277	431.858	105.194
G10	10	5882.8	862.615	290.163	313.231	150.632				G10	10	6074.69	890.609	316.541	434.947	166.489
G11	10	8220.23	1464.78	423.112	555.733	198.541				G11	10	9471.51	1654.68	652.724	759.83	193.421
G12	10	8721.64	1780.68	511.336	583.955	132.806				G12	10	8150.65	1755.16	385.568	589.345	295.036
H1	10	7302.99	965.753	496.001	478.066	302.306				H1	10	8441.05	1110	448.888	617.669	356.493
H2	10	8265.25	1220.93	418.987	528.685	192.276				H2	10	8251.37	1282.06	342.972	494.19	175.108
H3	10	6180.7	972.422	409.187	498.474	232.406				H3	10	6595.13	941.172	333.706	558.703	198.977
H4	10	4144.79	722.448	333.938	446.225	179.162				H4	10	5362.15	1224.83	581.093	571.535	266.687
H5	10	7012.52	1319.13	308.541	313.503	296.433				H5	10	7848.24	1326.29	278.036	321.667	56.2339
H6	10	4453.74	730.916	416.181	371.539	110.878				H6	10	5161.7	776.451	363.729	572.371	130.82
H7	10	3646.8	151.956	0	151.714	163.24				H7	10	3937.13	321.469	0	311.175	139.165
H8	10	3601.94	582.955	204.448	223.771	82.5061				H8	10	4117.61	675.504	246.54	231.782	0.482492
H9	10	5672.17	980.218	203.992	230.019	316.874				H9	10	5688.61	942.631	109.673	188.137	239.847
H10	10	7497.23	1215.14	456.273	504.41	327.873				H10	10	6810.06	1123.49	469.916	603.157	216.911
H11	10	4902.69	888.121	275.321	334.057	188.515				H11	10	5239.47	1028.04	286.282	501.637	49.5293
H12	10	7688.42	1360.75	542.019	616.603	210.034				H12	10	7063.15	1353.96	435.741	609.844	320.959
A1	11	6684.72	1058.51	439.898	610.594	404.404				A1	11	7777.27	1448.61	562.379	640.694	564.721
A2	11	4222.9	527.524	224.146	197.102	293.939				A2	11	4893.94	1007.34	243.89	426.878	314.935
A3	11	5047.23	590.158	428.952	528.137	391.82				A3	11	5954.25	860.274	517.823	687.618	238.589
A4	11	7070.49	702.852	41.3012	40.6837	0				A4	11	7869.61	1193.98	213.627	264.444	0
A5	11	3495.06	439.9	121.705	9.68408	0				A5	11	4063.09	583.15	152.132	118.63	0
A6	11	3089.69	395.884	0	28.0212	158.18				A6	11	4219.99	637.362	0	165.58	0
A7	11	2829.48	304.003	35.3443	3.56583	131.812				A7	11	3143.72	458.224	36.4488	0	20.0071
A8	11	3076.6	385.039	122.906	241.875	0				A8	11	3398.19	522.626	77.5721	170.364	185.966
A9	11	4913.78	652.211	229.682	187.056	0				A9	11	5060.94	927.274	362.136	611.422	14.0323
A10	11	6396.46	874.589	492.404	704.281	0				A10	11	6688.76	1084.78	433.584	464.222	345.792
A11	11	4588.89	710.044	195.63	344.852	98.0818				A11	11	4646.04	805.879	499.322	440.273	39.9593
A12	11	4103.34	575.879	226.21	305.267	32.4477				A12	11	6032.14	787.759	190.493	578.955	261.384
B1	11	5009.41	680.048	389.974	512.804	110.175				B1	11	5922.27	1006.75	378.831	827.073	311.404
B2	11	8977.62	1533.19	443.192	565.55	165.434				B2	11	9426.87	1840.99	565.666	591.943	305.693
B3	11	3375.96	413.565	251.753	360.732	66.384				B3	11	4172.71	669.367	350.696	322.356	0
B4	11	3692.91	403.374	265.354	76.6632	135.82				B4	11	4301.17	591.434	320.401	293.124	233.669
B5	11	4993.61	644.897	88.0481	1152.68	1441.09				B5	11	5721.76	958.666	401.897	1669.79	1554.94
B6	11	3884.64	700.522	333.179	553.87	0				B6	11	4230.18	589.638	251.984	453.753	129.678
B7	11	3867.56	658.048	158.863	73.6368	156.199				B7	11	4476.56	690.179	224.6	206.81	0
B8	11	3772.17	592.707	264.046	466.342	463.383				B8	11	3932.8	878.349	288.534	438.84	388.274
B9	11	3999.9	634.421	279.785	0	224.566				B9	11	4752.3	745.677	283.84	336.197	219.822
B10	11	2938.53	545.536	235.48	309.53	232.117				B10	11	3279.25	447.486	279.125	347.327	129.941
B11	11	6360.02	895.65	428.929	369.605	106.215				B11	11	7107.34	1109.83	483.961	108.888	0
B12	11	5061.39	1062.73	346.153	591.032	81.8653				B12	11	5996.33	967.949	331.73	362.812	223.269
C1	11	4127.73	458.869	266.463	167.348	275.32				C1	11	4824.19	771.18	254.878	474.973	183.131
C2	11	4483.23	689.704	294.351	289.022	326.773				C2	11	5645.71	833.392	377.34	371.599	117.396
C3	11	4074.92	563.988	342.128	227.836	164.978				C3	11	4397.49	570.639	342.128	529.345	204.46
C4	11	3768.02	608.624	235.043	95.8368	0				C4	11	3844.34	632.298	280.163	262.664	118.668
C5	11	3333.27	402.867	77.3818	67.4627	139.074				C5	11	3682.57	742.576	159.992	254.859	16.5868
C6	11	2662.29	372.082	176.15	251.949	208.283				C6	11	3219.58	472.598	245.632	509.841	33.4741
C7	11	3037.75	446.998	129.742	183.144	93.6521				C7	11	4134.48	629.108	182.191	199.997	237.094
C8	11	3206.14	465.717	306.564	440.833	290.094				C8	11	3975.97	713.093	361.49	236.107	191.198
C9	11	3439.36	472.145	203.825	348.545	379.488				C9	11	3933.04	684.549	233.495	107.576	289.44
C10	11	3881.79	713.173	367.202	300.879	67.7011				C10	11	4038.76	754.039	359.277	443.186	294.876
C11	11	4038.13	897.043	430.869	570.986	66.281				C11	11	4257.95	837.636	437.91	387.995	125.197
C12	11	4033.1	792.976	302.588	312.579	0				C12	11	4180.97	898.835	380.624	395.933	190.448
D1	11	3416.43	447.154	187.511	153.293	16.2966				D1	11	4161.44	607.492	183.068	67.6063	27.4079
D2	11	2838.66	523.025	286.806	150.334	280.12				D2	11	3640.1	677.882	283.859	282.335	0
D3	11	2847.44	509.693	295.617	197.357	92.6048				D3	11	3501.88	610.469	209.437	296.035	454.41
D4	11	2585.82	369.072	201.498	302.79	294.515				D4	11	3093.01	460.178	117.876	431.03	0
D5	11	4704.54	895.526	196.173	154.258	268.502				D5	11	5523.94	1063.5	237.587	318.974	175.669
D6	11	3465.01	688.499	235.531	200.491	178.162				D6	11	4219.72	809.884	236.621	264.701	17.3816
D7	11	3000.58	467.75	248.015	236.996	176.403				D7	11	3723.57	651.666	289.849	272.905	616.748
D8	11	2327.3	642.81	28.7945	0	100.281				D8	11	2945.71	531.06	21.0421	0	617.908
D9	11	2669.07	443.455	95.8909	154.333	0				D9	11	3055.49	426.081	205.988	0	109.093
D10	11	2591.54	531.288	313.32	95.6745	327.467				D10	11	2740	486.17	304.104	114.809	0
D11	11	2643.1	513.07	176.547	145.144	0				D11	11	2614.16	708.859	180.244	114.042	71.944
D12	11	5068.39	1222.07	418.816	455.343	219.191				D12	11	4956.08	703.4	300.909	231.439	197.167
E1	11	5240.59	755.92	369.205	373.505	52.3863				E1	11	6583.54	951.691	377.391	416.781	266.756
E2	11	3688.24	449.288	217.106	180.285	0				E2	11	4540.45	831.803	363.376	440.211	101.021
E3	11	3762.8	630.502	355.458	223.481	151.554				E3	11	4719.76	885.761	380.143	547.461	195.056
E4	11	3015.61	412.116	241.609	9.87567	224.716				E4	11	3789.6	499.944	253.812	238.427	561.79
E5	11	5820.26	990.132	196.045	321.989	244.431				E5	11	6780.06	1171.07	320.096	337.632	70.4537
E6	11	3947.69	597.396	243.408	231.674	0				E6	11	4112.05	894.283	333.932	547.7	333.882
E7	11	3612.93	660.395	233.781	157.727	285.746				E7	11	4087.6	645.738	336.174	180.413	44.6102
E8	11	3180.67	486.713	147.218	228.228	232.639				E8	11	3403.88	596.498	235.387	359.898	236.818
E9	11	2748.51	522.404	186.486	273.131	0				E9	11	2818.47	614.64	299.74	173.083	0
E10	11	3382.14	860.992	304.691	367.506	0				E10	11	3091.67	584.997	194.229	334.472	173.373
E11	11	4139.61	773.993	313.708	482.281	169.478				E11	11	3914.24	729.171	242.97	487.412	48.4224
E12	11	3243.78	648.543	237.819	51.9541	51.5466				E12	11	3145.83	674.041	90.8737	263.177	0
F1	11	4305.04	607.456	277.359	255.575	176.345				F1	11	4290.88	477.423	228.414	336.654	30.064
F2	11	5772.69	773.414	414.834	626.419	246.281				F2	11	6722.45	926.021	498.207	531.916	309.896
F3	11	5902.28	902.076	416.67	570.865	275.523				F3	11	6836.94	1008.72	376.495	505.786	326.59
F4	11	4948.23	972.394	234.01	596.296	183.155				F4	11	6241.38	1201.78	387.616	364.477	0
F5	11	4419.59	639.012	256.108	442.01	479.257				F5	11	5014.96	707.215	375.096	410.809	332.897
F6	11	2638.2	470.053	212.026	221.998	0				F6	11	3101.03	533.301	234.549	214.66	256.509
F7	11	3507.24	569.716	83.6871	84.7807	196.014				F7	11	3888.41	567.717	152.945	174.7	245.475
F8	11	3414.38	730.515	227.413	485.423	32.2332				F8	11	4361.79	706.262	221.096	219.977	0
F9	11	3128.17	591.796	313.426	239.287	228.565				F9	11	3768.06	725.305	374.509	698.672	346.382
F10	11	4128.66	769.153	0	0	3.56371				F10	11	5653.33	967.34	97.0635	374.012	571.085
F11	11	4741.15	791.09	379.858	519.681	237.58				F11	11	4845.97	819.765	333.515	331.711	20.087
F12	11	4049.33	851.947	415.037	429.89	44.2917				F12	11	4235.1	602.386	256.207	163.305	208.335
G1	11	8654.36	1358.09	591.628	837.519	488.896				G1	11	10157.6	1233.19	706.436	907.923	367.037
G2	11	7476.97	845.362	647.785	793.463	98.3818				G2	11	9008.8	1228.42	807.144	990.543	126.37
G3	11	5098.16	896.213	559.802	624.907	352.007				G3	11	5679.11	851.144	484.069	695.652	275.027
G4	11	4764.15	682.372	441.09	546.435	406.996				G4	11	5763.64	837.068	536.267	461.977	315.737
G5	11	4424.7	463.399	279.312	341.165	36.2557				G5	11	4640.27	742.237	270.796	381.846	180.325
G6	11	5944.84	1113.04	416.442	134.824	0				G6	11	6506.71	1058.19	358.12	240.435	0
G7	11	3332.62	541.898	271.835	151.039	0				G7	11	4117.19	713.061	312.418	341.139	0
G8	11	4754.25	1015.86	270.585	183.063	236.518				G8	11	5069.11	727.45	177.657	287.67	84.4705
G9	11	5479.65	755.655	263.844	398.885	195.142				G9	11	6175.49	1073.14	312.176	492.173	202.764
G10	11	5751.91	896.468	298.138	400.336	85.6227				G10	11	6013.7	861.313	236.179	386.491	198.201
G11	11	8087.41	1375.96	501.466	672.535	193.421				G11	11	9373.78	1615.63	684.065	748.764	345.882
G12	11	8409.06	1863.6	478.287	680.083	112.13				G12	11	8252.21	1444.74	477.369	413.26	207.559
H1	11	7380.3	1053.67	365.13	435.884	289.948				H1	11	8858.16	1180.06	619.02	667.886	172.067
H2	11	8231.09	1238.39	398.173	390.002	153.821				H2	11	8162.79	1302.15	418.082	511.79	100.258
H3	11	6089.85	811.577	422.099	484.21	433.771				H3	11	6705.37	1103.85	362.508	416.056	233.998
H4	11	3992.54	680.744	370.733	345.366	1.17483				H4	11	5391.05	1308.88	565.125	620.436	316.03
H5	11	7245.01	1386.72	186.519	339.628	124.518				H5	11	7995.12	1377.18	303.312	412.289	363.111
H6	11	4601.39	659.473	386.946	369.865	31.9074				H6	11	4936.34	848.679	429.08	615.047	257.653
H7	11	3477.9	265.167	0	158.17	48.7371				H7	11	4033.9	352.345	0	34.2164	291.248
H8	11	3513.3	538.808	212.648	342.332	28.467				H8	11	4112.04	604.23	201.168	225.373	186.242
H9	11	5696	1040.65	220.808	206.751	357.579				H9	11	5650.81	908.728	130.876	201.433	16.2821
H10	11	7384.08	1159.5	472.948	623.84	306.559				H10	11	6879.97	1164.41	413.071	492.4	175.535
H11	11	4834.02	872.657	320.456	369.337	181.944				H11	11	5296.56	1038.35	299.178	292.714	168.299
H12	11	7550.08	1503.22	637.669	633.126	262.543				H12	11	7382.32	1348.15	487.245	572.292	145.055
A1	12	5851.01	978.665	353.643	495.929	44.7733				A1	12	7563.58	1181.7	457.149	531.762	752.48
A2	12	3687.4	460.731	198.596	120.158	0				A2	12	4879.07	796.056	356.544	217.128	421.822
A3	12	5075.44	750.18	338.896	522.358	512.143				A3	12	6000.27	943.485	439.616	410.259	477.178
A4	12	7278.95	776.305	0	200.513	0				A4	12	7949.52	1178.14	264.897	610.256	250.384
A5	12	3344.63	585.406	107.055	190.05	54.5795				A5	12	4201.86	517.729	95.7865	234.839	191.028
A6	12	2844.43	148.602	0	0	0				A6	12	4342.62	345.963	109.955	291.675	164.171
A7	12	3049.96	214.134	0	216.327	0				A7	12	3080.37	484.852	24.2992	192.555	230.67
A8	12	3136.97	424.056	79.587	52.5815	235.193				A8	12	3494.55	490.796	81.6018	287.095	0
A9	12	4812.39	730.193	326.909	302.919	0				A9	12	5110	886.156	384.682	399.239	235.432
A10	12	6542.61	942.276	396.612	853.723	314.197				A10	12	6603.35	1018.87	420.14	540.532	384.409
A11	12	5125.07	773.208	344.681	286.261	252.47				A11	12	4983.54	766.674	530.995	460.361	405.042
A12	12	3954.97	747.013	414.719	471.936	686.81				A12	12	6106.32	1195.22	450.436	319.303	270.397
B1	12	4931.72	776.797	407.801	552.323	286.819				B1	12	5778.22	893.176	423.4	920.225	218.529
B2	12	8752.36	1550.62	506.505	393.058	0				B2	12	9112.77	1584.3	388.182	626.818	26.9729
B3	12	3460.21	462.021	207.779	287.27	108.911				B3	12	4267.79	442.864	268.244	560.286	0
B4	12	3866.28	650.032	176.433	108.23	495.086				B4	12	4694.16	598.247	467.193	500.566	106.611
B5	12	5335.62	755.718	200.238	795.672	1143.44				B5	12	5945.17	837.164	150.534	1565.73	1771.27
B6	12	3975.01	555.721	282.782	211.536	347.998				B6	12	4626.21	823.146	268.783	597.469	49.245
B7	12	3863.58	444.696	264.315	319.615	294.119				B7	12	4358.47	685.038	234.186	238.144	262.547
B8	12	3551.18	723.286	333.251	365.9	518.123				B8	12	4206.99	698.803	132.023	389.815	262.244
B9	12	4168.63	739.054	320.334	544.919	0				B9	12	4742.62	655.613	433.87	521.105	53.7693
B10	12	3231.95	403.676	407.015	286.034	202.131				B10	12	3364.16	616.466	321.755	417.814	154.375
B11	12	6859.39	1030.17	323.72	411.013	209.111				B11	12	7291.13	1077.97	451.589	449.354	86.2997
B12	12	5694.6	897.369	374.999	266.257	242.619				B12	12	5709.47	1373.28	520.832	640.772	150.334
C1	12	4035.53	575.768	318.597	65.2165	232.963				C1	12	4798.69	778.159	260.671	327.313	135.791
C2	12	4496.39	619.912	235.999	96.7338	43.5697				C2	12	5316.7	900.447	268.417	225.319	169.438
C3	12	3764.61	575.959	275.338	99.5932	311.625				C3	12	4502.29	595.912	388.472	309.694	290.474
C4	12	3816.42	612.569	103.881	0	0				C4	12	4301.38	767.438	245.536	73.3565	134.095
C5	12	3348.27	594.252	159.992	232.372	0				C5	12	3623.47	555.975	175.678	248.613	521.847
C6	12	3161.52	377.373	218.23	215.108	109.101				C6	12	3267.17	501.694	303.37	467.057	331.021
C7	12	3044.49	521.498	87.4149	137.077	49.7897				C7	12	4083.54	689.536	288.929	199.997	360.383
C8	12	3146	559.79	224.814	242.085	0				C8	12	4028.45	581.856	325.724	135.986	331.3
C9	12	3468.61	619.007	343.148	140.565	438.984				C9	12	3750.54	507.343	336.698	0	0
C10	12	3680.91	603.758	379.09	449.963	212.13				C10	12	4178.44	651.215	513.818	430.989	64.6922
C11	12	4351.3	755.952	449.174	319.202	164.966				C11	12	4619.3	843.577	447.766	707.197	132.562
C12	12	4158.79	816.073	495.289	379.56	193.401				C12	12	4393.53	858.416	254.811	403.375	76.7697
D1	12	3336.16	471.055	219.504	184.738	245.19				D1	12	4145.62	598.529	184.845	251.558	0
D2	12	2921.39	422.522	306.45	264.002	40.8121				D2	12	3439.48	576.353	321.183	430.836	0
D3	12	2676.08	470.933	276.577	237.248	213.206				D3	12	3542.89	597.872	297.621	380.017	153.982
D4	12	2693.91	469.474	204.52	189.986	11.1841				D4	12	2998.23	524.324	148.101	351.473	335.524
D5	12	4951.59	653.333	82.8286	301.979	79.9792				D5	12	5633.84	966.816	397.795	525.523	0
D6	12	3833.16	682.672	128.67	220.147	202.786				D6	12	4262.67	672.961	297.685	294.84	0
D7	12	3064.79	520.803	255.983	283.677	0				D7	12	3784.62	611.877	309.769	156.8	35.8112
D8	12	2461.16	325.361	50.9441	0	1.47472				D8	12	3018	572.595	0	0	2.94944
D9	12	2790.56	377.268	150.052	0	0				D9	12	2938.39	483.167	221.082	201.258	197.035
D10	12	2532.33	335.162	271.851	282.995	392.75				D10	12	2784.62	462.23	246.969	293.066	0
D11	12	2690.36	487.968	116.466	257.301	0				D11	12	2726.06	640.584	232.931	0	0
D12	12	5032.72	981.918	467.944	482.254	315.677				D12	12	4982.51	868.237	418.816	614.659	9.43884
E1	12	5326.46	681.92	291.434	447.407	164.741				E1	12	6397.48	806.502	345.464	511.988	300.532
E2	12	3598.8	515.108	170.189	353.569	209.008				E2	12	4199.77	717.335	373.495	448.087	193.333
E3	12	3868.64	526.987	187.603	358.362	95.423				E3	12	4789.22	822.241	419.638	505.145	220.315
E4	12	3338.02	628.308	258.693	169.297	33.8613				E4	12	3529.23	774.688	244.05	340.005	546.398
E5	12	6022.37	991.137	169.463	490.154	87.7076				E5	12	6515.62	1146.94	369.938	230.737	80.5185
E6	12	3918.17	696.962	335.944	313.65	25.1737				E6	12	4157.52	869.844	350.025	446.714	29.1485
E7	12	3722.31	653.066	279.994	212.823	230.285				E7	12	3978.23	768.696	327.113	307.891	0
E8	12	3086.25	495.496	161.778	48.906	0				E8	12	3622.1	658.71	296.863	228.228	0
E9	12	2964.58	495.37	160.94	127.061	0				E9	12	3097.65	598.737	258.015	355.17	249.827
E10	12	3330.39	706.031	362.683	303.502	399.929				E10	12	3220.21	668.438	332.306	328.278	59.5638
E11	12	4015.88	720.425	359.842	373.511	291.543				E11	12	3819.22	684.349	266.549	194.965	265.314
E12	12	3308.74	633.022	225.251	223.147	196.368				E12	12	3342.76	470.055	147.912	166.083	0
F1	12	4369.99	585.783	201.972	239.271	106.346				F1	12	4339.18	555.825	264.42	314.181	109.038
F2	12	5684.43	787.948	449.404	688.521	388.052				F2	12	6442.35	838.817	468.722	644.419	98.1489
F3	12	5942.36	850.933	384.53	421.298	222.081				F3	12	6836.94	1039.18	502.758	688.463	239.895
F4	12	5191.31	1068.63	242.41	355.097	94.4846				F4	12	6303.38	1238.71	450.019	328.298	385.207
F5	12	4369.74	667.342	350.165	75.4017	235.324				F5	12	5012.19	728.2	322.968	237.905	0
F6	12	2865.09	561.332	242.315	314.651	163.771				F6	12	3126.37	447.053	241.538	341.254	0
F7	12	3559.85	512.411	167.374	132.738	0				F7	12	3767.51	517.075	50.5009	128.456	0
F8	12	3224.22	672.307	270.58	33.1808	284.727				F8	12	4308.54	888.648	263.21	553.014	57.7512
F9	12	3198.61	652.396	377.513	405.207	377.014				F9	12	3503.28	629.671	476.647	621.919	81.2937
F10	12	4147.14	674.778	0	0	0				F10	12	5752.51	915.434	61.9357	405.723	180.858
F11	12	5010.81	788.56	383.657	440.07	139.916				F11	12	4970.5	823.982	362.385	518.944	84.5038
F12	12	4132.26	828.281	246.753	448.427	282.975				F12	12	4379.96	715.334	268.498	312.487	145.178
G1	12	8502.87	1210.96	651.81	856.587	256.853				G1	12	9641.29	1429.02	761.988	1051.67	202.855
G2	12	7310.84	1086.17	589.836	759.188	56.824				G2	12	8969.84	1284.3	711.942	882.577	337.551
G3	12	4998.52	769.871	427.854	725.475	484.272				G3	12	5574.35	997.434	473.919	669.99	207.845
G4	12	4506.1	667.187	408.341	319.517	236.016				G4	12	5313.83	760.195	542.407	611.56	343.01
G5	12	4482.68	800.561	277.609	529.776	342.521				G5	12	4476.54	693.5	256.32	261.652	30.5311
G6	12	5919.38	1103.58	343.795	167.406	0				G6	12	6297.24	1049.68	253.754	295.488	0
G7	12	3330.8	504.966	212.873	114.581	168.761				G7	12	3963.29	709.51	334.624	374.125	219.124
G8	12	4845.25	811.32	278.785	95.5548	187.823				G8	12	5201.98	869.516	193.145	106.619	250.43
G9	12	5253.24	907.093	247.997	356.262	215.723				G9	12	6116.91	893.256	354.169	401.298	122.726
G10	12	5788.23	867.172	280.348	271.121	137.948				G10	12	6121.3	919.905	281.574	417.642	245.24
G11	12	8114.98	1383.62	436.739	635.65	108.088				G11	12	9273.54	1602.61	598.216	815.157	237.225
G12	12	8602.02	1630.78	391.076	733.986	97.02				G12	12	8248.82	1739.22	444.321	583.056	126.444
H1	12	7596.04	1181.43	389.996	454.966	302.306				H1	12	8568.7	1078.4	494.692	789.411	0
H2	12	7976.01	1164.16	523.055	528.685	108.498				H2	12	8238.57	1277.69	343.877	526.573	0
H3	12	6203.16	668.195	421.105	639.537	237.977				H3	12	6733.95	789.518	505.525	516.702	142.468
H4	12	4053.57	732.072	310.333	454.783	152.141				H4	12	5378.85	1252.41	590.813	474.954	239.666
H5	12	7117.77	1217.35	193.492	220.432	133.355				H5	12	7731.99	1572.78	270.192	416.371	188.785
H6	12	4486.38	773.311	358.57	484.507	302.323				H6	12	5089.43	796.078	355.99	525.51	230.531
H7	12	3512.76	210.68	0	59.3945	46.9755				H7	12	3944.94	405.015	0	193.032	0
H8	12	3502.7	664.334	202.261	242.997	174.662				H8	12	4066.32	595.188	182.035	249.406	87.3311
H9	12	5774.87	972.111	226.657	215.394	363.841				H9	12	5669.71	896.936	152.811	223.371	98.9448
H10	12	7623.25	1203.68	399.429	463.043	245.748				H10	12	6875.37	1217.59	459.305	421.009	124.128
H11	12	4864.63	840.991	227.607	294.367	109.167				H11	12	5247.74	1071.49	357.853	396.9	204.182
H12	12	7688.42	1391.76	500.325	711.234	147.024				H12	12	7406.29	1258.01	416.12	497.939	266.481
A1	13	6070.73	1060.79	372.619	197.798	205.091				A1	13	7376.97	1309.45	538.228	504.529	239.754
A2	13	4049.36	569.78	150.979	151.779	308.254				A2	13	4829.48	534.339	263.633	227.668	229.998
A3	13	4747.37	786.024	344.82	659.882	429.871				A3	13	6187.31	1013.89	526.118	775.448	216.992
A4	13	6594.49	769.104	0	56.6666	0				A4	13	7963.42	1101.81	219.324	450.427	0
A5	13	2903.69	418.469	146.497	118.63	0				A5	13	4168.14	425.237	105.929	200.945	0
A6	13	2824.44	130.026	0	53.495	155.783				A6	13	4101.36	456.253	0	161.759	65.9081
A7	13	2795.27	408.296	112.66	0	7.06134				A7	13	3286.91	433.815	152.422	128.37	0
A8	13	3407.48	403.521	30.2229	215.584	194.718				A8	13	3498.03	418.922	27.2006	256.598	165.182
A9	13	4459.19	857.799	183.182	309.899	62.366				A9	13	5589.11	903.17	349.454	524.873	338.336
A10	13	5975.09	1330.59	357.959	837.825	0				A10	13	6848.2	1136.43	389.89	723.359	245.741
A11	13	4379.31	485.705	324.186	411.814	410.491				A11	13	5274.77	1036.75	456.469	247.758	445.001
A12	13	4145.07	842.087	188.508	540.358	97.3431				A12	13	6106.32	964.326	400.829	535.095	394.78
B1	13	5130.8	776.797	374.375	520.332	319.598				B1	13	5660.07	917.013	495.823	921.166	439.789
B2	13	9020.16	1529.71	467.064	487.316	400.098				B2	13	9279.21	1760.85	554.249	691.857	459.438
B3	13	3580.56	536.395	140.718	177.625	190.854				B3	13	4010.23	705.427	289.132	164.467	128.619
B4	13	3522.42	425.178	193.37	91.6952	147.503				B4	13	4426.87	513.757	248.417	685.459	73.0215
B5	13	4972.93	814.466	136.332	970.176	1193.86				B5	13	5703.83	898.583	427.459	1556.12	1598.86
B6	13	4040.13	697.913	305.18	523.189	303.677				B6	13	4078.67	751.398	305.18	331.03	247.867
B7	13	4142.21	429.273	310.879	294.547	79.7611				B7	13	4016.16	514.1	128.734	235.011	31.5721
B8	13	3717.95	686.561	302.375	303.72	556.314				B8	13	4193.69	615.15	262.981	341.984	246.968
B9	13	4078.73	374.825	373.047	155.491	128.097				B9	13	4388.54	696.671	233.83	336.197	358.989
B10	13	2831.05	654.017	207.06	430.073	111.061				B10	13	3408.22	490.252	244.615	328.939	31.0971
B11	13	6618.37	1072.66	517.952	346.6	0				B11	13	7313.67	1058.5	513.096	164.098	194.174
B12	13	5860.34	939.717	304.486	472.533	291.738				B12	13	5975.08	911.485	499.999	425.718	192.011
C1	13	4298.41	959.612	325.838	143.968	301.481				C1	13	4404.35	809.564	201.296	238.717	138.283
C2	13	4338.47	556.963	141.34	212.342	215.428				C2	13	5240.67	860.761	346.219	344.467	217.849
C3	13	3844.91	563.988	254.892	298.78	112.806				C3	13	4353.94	826.029	441.631	358.808	0
C4	13	3839.69	503.076	203.564	349.035	301.417				C4	13	4181.31	692.47	241.339	414.109	86.6276
C5	13	3335.04	545.449	116.073	246.114	109.728				C5	13	3370.32	524.397	254.105	144.92	0
C6	13	2859.88	506.984	168.321	225.804	55.7901				C6	13	3469.6	536.081	249.546	143.801	64.4686
C7	13	3159.86	489.214	112.259	43.8196	0				C7	13	4207.15	706.919	260.404	328.085	261.989
C8	13	2844.19	619.021	219.704	263.006	44.503				C8	13	4091.88	678.252	258.025	573.83	309.873
C9	13	3444.04	526.763	362.498	152.04	48.24				C9	13	3730.65	483.069	259.296	337.07	72.36
C10	13	3804.63	483.798	467.588	399.816	0				C10	13	4189.08	751.402	430.604	416.08	299.39
C11	13	3901.11	766.348	509.721	410.009	0				C11	13	4443.14	1023.28	495.641	422.392	66.281
C12	13	4022.01	817.997	272.329	355.744	186.019				C12	13	4075.61	817.997	281.885	190.524	5.90536
D1	13	3573.57	480.018	125.304	315.234	59.2603				D1	13	4280.15	597.533	136.857	368.69	212.596
D2	13	3035.14	388.68	285.823	258.501	2.78264				D2	13	3330.9	726.082	84.4701	324.502	102.958
D3	13	2777.26	394.382	240.502	233.049	0				D3	13	3344.19	516.476	266.556	429.356	307.965
D4	13	2473.58	418.343	235.753	199.485	226.168				D4	13	2854.39	503.871	186.386	169.8	105.628
D5	13	4861.91	920.917	164.567	484.997	372.76				D5	13	5640.87	942.402	325.865	572.584	238.509
D6	13	3838.42	672.961	83.9623	365.602	24.624				D6	13	4116.29	699.18	408.908	465.192	107.187
D7	13	2788.12	372.255	156.379	0	255.984				D7	13	3609.42	523.455	372.52	214.254	51.7273
D8	13	2464.73	442.055	0	166.535	73.736				D8	13	3093.85	465.79	13.2898	0	0
D9	13	2598.08	553.491	146.5	172.06	212.619				D9	13	2781.05	421.944	238.839	204.387	18.9242
D10	13	2684.22	463.15	240.519	369.606	15.7943				D10	13	2727.99	499.981	263.557	408.883	340.103
D11	13	2794.54	541.183	134.952	0	193.113				D11	13	2905.48	637.572	61.9301	0	124.955
D12	13	5212.41	959.182	542.864	603.894	192.972				D12	13	5211.09	912.288	221.076	533.924	102.778
E1	13	5601.97	906.729	334.003	459.391	170.945				E1	13	6263.9	813.996	312.719	432.76	402.547
E2	13	3706.33	488.398	181.228	329.064	96.6664				E2	13	4376.64	637.207	442.491	448.962	37.4473
E3	13	3552.22	658.734	359.161	376.875	157.167				E3	13	4849.85	938.695	414.701	584.488	325.561
E4	13	3253.61	431.258	229.407	389.384	0				E4	13	3516.01	630.56	289.199	196.103	350.926
E5	13	5841.63	1083.62	218.197	497.975	2.87566				E5	13	6656.3	1086.63	330.065	348.061	0
E6	13	3842.38	560.285	337.956	489.485	241.137				E6	13	4089.71	613.688	331.921	540.572	7.94958
E7	13	3716.59	456.821	197.536	58.3373	212.2				E7	13	4119.77	548.022	314.427	365.148	379.789
E8	13	2992.47	572.346	152.88	358.644	0				E8	13	3625.22	512.33	342.97	173.052	140.698
E9	13	2804.07	547.849	217.141	156.075	20.906				E9	13	3149.78	580.449	247.796	326.156	268.642
E10	13	3238.57	576.745	278.916	213.69	380.783				E10	13	3105.02	717.951	339.67	232.272	69.1366
E11	13	3972.79	862.543	285.003	317.074	155.355				E11	13	3784.98	732.451	377.27	197.017	135.179
E12	13	3327.3	593.112	261.02	221.444	41.7282				E12	13	3261.31	399.103	105.375	40.8819	82.6382
F1	13	4179.3	629.765	229.539	285.099	61.4741				F1	13	4190.96	587.058	217.724	367.5	75.833
F2	13	5550.26	607.312	457.537	494.115	103.602				F2	13	6398.81	820.131	459.571	595.818	41.8042
F3	13	6025.7	959.748	361.573	425.865	59.38				F3	13	6744.1	1054.42	531.455	687.321	396.658
F4	13	4944.29	772.096	278.412	184.919	175.887				F4	13	6069.15	1209.62	300.013	391.277	62.5052
F5	13	4457.43	583.4	287.838	418.61	183.667				F5	13	4931.88	759.679	300.303	496.611	68.8752
F6	13	2713.62	498.083	243.868	314.651	458.756				F6	13	3094.99	613.081	300.564	254.106	128.254
F7	13	3625.34	470.432	131.302	131.881	159.376				F7	13	3821.24	542.396	168.096	10.2765	76.94
F8	13	3526.79	604.397	325.328	482.966	0				F8	13	4248.54	835.291	257.946	439.953	6.71525
F9	13	3213.04	536.878	366.498	332.969	175.547				F9	13	3508.37	671.334	371.505	569.999	299.255
F10	13	4373.7	670.06	0	0	0				F10	13	5491.92	914.49	108.156	468.214	361.717
F11	13	4580.78	811.332	404.929	489.458	201.562				F11	13	4961.54	934.465	233.993	375.202	61.6462
F12	13	4319.14	666.928	368.712	324.845	0				F12	13	4084.71	607.765	244.862	338.086	107.448
G1	13	8523.46	1235.3	584.221	894.722	318.147				G1	13	9664.82	1209.9	685.141	1055.33	530.488
G2	13	7318.86	1039.43	676.759	708.632	470.706				G2	13	8704.04	1125.79	582.592	1035.96	368.932
G3	13	5271.05	904.34	468.454	631.15	289.723				G3	13	5455.67	815.679	435.662	593.697	442.983
G4	13	4612.15	670.034	288.602	429.415	412.241				G4	13	5330.62	834.221	356.147	414.151	436.367
G5	13	4422.65	651.954	256.32	369.826	166.013				G5	13	4493.6	670.33	228.218	306.031	305.311
G6	13	5932.52	960.789	218.965	490.983	0				G6	13	6375.28	1083.72	265.009	37.0765	0
G7	13	3289.77	520.591	283.32	202.253	150.206				G7	13	4120.81	579.539	374.442	470.477	229.727
G8	13	4574.68	809.609	209.544	229.332	393.533				G8	13	5206.81	847.265	234.143	210.221	72.5453
G9	13	5318.16	864.813	212.343	248.499	182.945				G9	13	5947.5	895.562	331.984	468.047	128.824
G10	13	5765.61	843.084	262.557	461.482	90.908				G10	13	6014.39	946.598	278.507	486.287	102.007
G11	13	8097.44	1402	485.795	546.512	120.604				G11	13	9355.41	1630.18	571.644	842.821	438.61
G12	13	8488.05	1820.01	533.368	714.222	392.852				G12	13	8255.59	1648.85	326.814	503.998	62.0292
H1	13	7362.32	931.409	421.405	483.088	229.106				H1	13	8748.48	1079.78	447.579	605.617	266.181
H2	13	8085.94	1220.93	342.972	402.674	189.529				H2	13	8145.71	1309.14	360.166	559.66	58.3694
H3	13	6092.92	829.04	424.085	519.079	355.772				H3	13	6481.83	891.54	285.041	605.46	81.9787
H4	13	4090.83	621.716	379.064	526.301	321.317				H4	13	5199.62	1225.47	576.928	424.831	147.441
H5	13	7049.43	1361.27	192.621	320.85	342.224				H5	13	7739.06	1397.85	348.634	360.855	124.518
H6	13	4448.3	684.596	325.034	380.744	267.225				H6	13	5091.76	800.004	417.901	461.076	176.289
H7	13	3470.68	219.761	0	89.0917	93.951				H7	13	4024.28	458.29	0	199.488	52.8475
H8	13	3471.48	608.486	201.715	154.343	13.0273				H8	13	4078.03	615.932	224.127	288.926	30.397
H9	13	5635.2	840.924	230.313	263.259	244.231				H9	13	5596.59	802.6	146.231	238.661	191.627
H10	13	7313.24	1312.51	455.515	459.04	265.183				H10	13	6971.04	1116.13	440.357	569.129	137.92
H11	13	4990.41	928.624	298.533	359.966	423.526				H11	13	5105.42	868.974	294.02	443.756	113.715
H12	13	7647.03	1395.64	407.945	552.765	190.344				H12	13	7224.37	1430.53	501.143	459.636	259.917
A1	14	6365.68	964.977	274.289	513.129	179.093				A1	14	7238.52	1092.73	771.115	495.929	459.287
A2	14	4004.73	663.835	202.08	267.721	167.965				A2	14	5041.04	721.085	306.604	477.471	120.248
A3	14	5286.23	815.468	369.704	493.467	178.942				A3	14	6031.44	1171.36	516.638	649.481	178.942
A4	14	7265.05	891.527	66.9365	0	99.8873				A4	14	8052.02	1196.86	138.145	287.692	0
A5	14	3255.14	513.217	121.705	87.1567	0				A5	14	4127.94	572.999	131.847	30.2628	37.1141
A6	14	2865.76	61.5303	0	0	0				A6	14	4186.67	542.164	0	113.358	135.411
A7	14	3009.41	368.354	59.6435	21.395	84.7361				A7	14	3457.97	349.493	86.1518	73.6938	14.1227
A8	14	3003.46	436.377	61.4532	0	0				A8	14	3507.32	496.957	198.464	80.9755	0
A9	14	4627.62	806.757	124	145.178	143.442				A9	14	5360.19	1032.19	477.682	403.427	126.291
A10	14	6001.67	942.276	351.237	532.583	194.837				A10	14	6724.83	1115.06	571.39	626.381	0
A11	14	5165.9	775.386	221.714	341.504	341.47				A11	14	5280.21	710.044	264.566	112.161	0
A12	14	3788.05	643.789	226.21	387.725	232.542				A12	14	5457.21	1092	533.777	566.674	331.688
B1	14	4661.42	994.131	418.943	335.91	252.219				B1	14	6029.1	898.785	459.055	988.912	325.972
B2	14	8642.24	1565.72	449.419	535.388	143.855				B2	14	9264.19	1577.33	528.301	496.742	333.565
B3	14	3253.2	397.789	162.705	199.554	158.699				B3	14	4106.51	537.522	366.087	257.666	124.47
B4	14	3622.11	459.247	330.282	311.162	0				B4	14	4306.95	711.356	169.375	425.406	0
B5	14	4888.8	838.499	170.416	1048.62	1335.36				B5	14	5958.96	980.029	441.66	1610.56	1807.05
B6	14	4065.38	648.341	137.191	0	8.2075				B6	14	4401.61	704.435	256.184	442.45	105.056
B7	14	4034.74	471.687	165.711	0	282.487				B7	14	4152.82	568.081	230.078	283.58	0
B8	14	3573.69	603.929	276.822	275.022	450.653				B8	14	4014.64	622.291	305.569	528.521	66.1976
B9	14	4333.22	629.123	327.092	249.346	254.613				B9	14	4666.55	634.421	224.369	446.862	0
B10	14	3172.84	428.71	198.94	317.702	98.8443				B10	14	3239.48	675.922	249.69	185.922	396.488
B11	14	6590.63	1184.17	323.72	311.327	0				B11	14	7109.07	1239.04	419.217	420.215	170.94
B12	14	5458.74	988.114	310.897	427.181	0				B12	14	5609.6	1006.26	560.896	459.366	202.431
C1	14	3588.22	758.966	373.628	407.296	275.32				C1	14	4567.19	638.578	298.323	348.232	209.293
C2	14	4437.9	725.284	250.263	100.273	314.67				C2	14	5056.43	941.501	360.483	520.239	114.976
C3	14	4064.04	353.823	313.504	485.687	208.69				C3	14	3967.4	623.845	302.599	459.766	308.805
C4	14	3658.18	538.588	104.93	37.8614	15.4268				C4	14	4065.88	778.289	251.832	293.426	0
C5	14	3417.07	539.707	287.567	73.7093	0				C5	14	3340.33	486.119	185.089	379.79	0
C6	14	3064.73	451.437	228.017	104.583	0				C6	14	3269.59	511.393	271.076	410.012	68.1879
C7	14	3062.47	490.042	133.423	57.3026	263.174				C7	14	4004.88	650.63	270.526	161.796	28.4513
C8	14	3084.76	419.262	311.673	258.523	178.012				C8	14	3879.74	687.543	323.17	277.949	360.969
C9	14	3572.72	662.702	303.157	444.645	0				C9	14	3674.5	581.381	184.474	352.848	181.704
C10	14	3633.02	768.54	334.18	459.45	197.086				C10	14	3815.27	651.215	488.722	562.454	356.559
C11	14	4355.82	920.805	468.887	399.002	0				C11	14	4608.76	758.922	491.416	620.517	0
C12	14	4175.42	433.057	323.292	72.935	155.016				C12	14	4317.75	964.275	329.662	422.725	147.634
D1	14	3565.66	598.529	207.951	294.009	235.56				D1	14	4277.89	721.023	160.851	231.119	262.227
D2	14	2857.27	660.448	199.389	206.251	257.858				D2	14	3399.15	621.477	152.243	220.001	151.19
D3	14	2698.87	422.483	257.537	218.352	0				D3	14	3397.06	484.499	319.667	298.135	0
D4	14	2754.61	395.102	216.61	0	239.837				D4	14	3033.98	442.514	170.266	188.798	239.837
D5	14	5053.57	879.9	210.341	130.727	308.491				D5	14	5649.66	996.114	399.975	142.492	52.8434
D6	14	3721.84	633.147	130.85	568.714	136.156				D6	14	4114.54	757.445	248.616	412.776	0
D7	14	3013.27	304.17	182.276	483.568	163.14				D7	14	3676.01	580.929	301.801	171.164	29.1795
D8	14	2304.99	414.365	0	87.2329	163.694				D8	14	2832.38	388.653	0	0	0
D9	14	2686.64	413.671	242.391	343.078	0				D9	14	2963.28	421.944	99.4425	161.632	153.62
D10	14	2659.34	292.807	254.342	285.009	28.4297				D10	14	2721.12	394.092	223.931	253.789	0
D11	14	2598.72	602.43	188.563	185.671	197.846				D11	14	2764.64	441.782	92.433	174.361	184.593
D12	14	5053.86	916.551	436.011	452.113	388.041				D12	14	4740.72	666.454	354.95	503.783	225.483
E1	14	5516.1	808.376	350.376	370.176	142.684				E1	14	6570.42	851.464	316.812	498.006	268.135
E2	14	3607.84	571.388	220.785	283.555	200.3				E2	14	4493.22	593.328	366.136	406.079	346.605
E3	14	3596.32	539.926	314.729	604.323	390.112				E3	14	4641.48	696.375	266.594	465.474	0
E4	14	2812.2	494.314	217.204	386.562	247.803				E4	14	3393.96	543.858	219.645	265.232	223.177
E5	14	5787.31	1130.86	260.286	365.008	248.745				E5	14	6291.26	1219.32	324.527	587.924	450.041
E6	14	3739.46	511.407	334.938	564.333	107.319				E6	14	4141.57	567.526	304.763	561.957	211.989
E7	14	3689.42	640.037	257.341	224.707	254.398				E7	14	3989.67	585.48	340.704	159.887	282.129
E8	14	2959.95	577.469	181.192	130.416	0				E8	14	3510.18	581.86	188.472	194.37	305.078
E9	14	2753.31	609.869	148.167	235.113	247.736				E9	14	2989.27	560.571	254.609	235.113	0
E10	14	3304.51	679.441	295.486	286.985	239.319				E10	14	3309.52	615.256	304.691	267.371	85.0912
E11	14	4128.56	907.364	329.086	576.685	179.566				E11	14	4047.91	725.891	230.668	532.561	325.842
E12	14	3133.45	597.546	328.692	274.249	210.277				E12	14	3188.1	507.748	141.144	25.5512	0
F1	14	4256.74	546.901	199.159	293.912	154.358				F1	14	4174.31	572.398	279.61	342.383	89.7432
F2	14	5460.82	814.94	361.963	485.115	255.369				F2	14	6440	876.19	503.291	538.216	223.561
F3	14	5926.54	902.076	377.643	577.715	174.577				F3	14	6698.74	1058.77	525.715	642.794	206.642
F4	14	5003.34	907.493	249.61	309.538	341.598				F4	14	5999.28	1037.29	250.81	573.516	277.639
F5	14	4318.05	703.018	413.625	201.505	216.67				F5	14	4656.81	547.724	266.307	438.11	183.667
F6	14	2862.67	459.272	163.097	437.575	152.919				F6	14	3019.56	531.864	280.371	320.155	350.233
F7	14	3481.49	481.093	98.8374	65.9406	292.189				F7	14	3869.94	556.389	78.6371	209.811	0.915953
F8	14	3524.25	822.679	399.026	340.411	60.4372				F8	14	4328.83	773.202	348.49	342.869	0
F9	14	3258.87	625.884	369.502	299.108	199.111				F9	14	3498.19	677.015	311.423	466.157	362.876
F10	14	4101.44	766.322	0	0	0				F10	14	5642.63	760.659	179.336	341.367	117.602
F11	14	4871.05	705.066	366.943	450.39	131.604				F11	14	4962.43	737.114	309.964	435.647	142.687
F12	14	4090.24	836.887	386.675	520.811	142.718				F12	14	4043.8	771.27	169.229	219.8	49.213
G1	14	8508.75	1115.69	566.63	740.713	347.335				G1	14	9533.92	1434.31	648.106	1086.13	351.713
G2	14	7332.61	1062.8	590.871	793.463	346.881				G2	14	9011.09	1197.93	730.569	1113.08	260.373
G3	14	5124.53	703.376	470.796	637.392	268.029				G3	14	5405.12	860.749	464.55	581.212	81.1785
G4	14	4535.27	809.546	375.591	552.541	164.687				G4	14	5755.69	785.819	609.952	665.491	148.952
G5	14	4445.85	707.082	226.515	293.087	0				G5	14	4529.75	711.077	435.147	371.676	0
G6	14	5867.62	990.104	287.519	156.171	0				G6	14	6431.14	1148.97	271.148	308.971	0
G7	14	3317.53	497.154	288.681	198.781	122.815				G7	14	3883.02	713.061	283.32	459.193	112.213
G8	14	4834.78	882.354	204.078	366.126	109.315				G8	14	5288.95	914.019	204.078	120.701	0
G9	14	5170.12	801.778	144.203	481.718	161.602				G9	14	6172.32	941.686	299.498	324.898	232.493
G10	14	5680.63	804.673	347.827	373.801	69.2381				G10	14	5993.14	914.697	284.028	421.103	158.561
G11	14	8147.56	1374.43	511.686	648.56	160.994				G11	14	9072.24	1575.81	609.118	706.347	237.794
G12	14	8473.38	1738.15	499.402	645.045	310.146				G12	14	8348.12	1520.22	430.55	727.698	327.641
H1	14	7209.5	1144.34	492.075	664.873	242.415				H1	14	8459.03	1167.7	464.592	805.481	202.488
H2	14	8066.73	1290.8	402.698	581.483	11.6739				H2	14	8149.98	1152.81	382.789	508.27	134.593
H3	14	6161.31	850.18	455.866	546.816	186.243				H3	14	6442.02	774.812	385.351	572.176	182.263
H4	14	4068.99	617.867	325.607	378.374	145.679				H4	14	5280.56	1196.6	611.64	573.98	119.833
H5	14	7138.19	1259.5	218.768	320.85	124.518				H5	14	7812.11	1397.85	185.648	340.444	122.108
H6	14	4491.04	678.315	203.791	436.809	326.254				H6	14	5102.64	814.92	374.907	436.809	177.086
H7	14	3536.8	188.28	0	227.894	109.805				H7	14	3944.94	441.944	0	99.4212	0
H8	14	3501.59	604.23	207.728	293.732	233.044				H8	14	3966.53	610.613	156.342	256.882	0
H9	14	5567.01	1053.18	215.69	301.817	185.991				H9	14	5646.71	764.275	109.673	77.781	0
H10	14	7841.27	1269.96	414.587	515.753	157.354				H10	14	7368.44	1083.4	466.884	505.744	256.406
H11	14	5375.17	916.842	368.169	458.089	0				H11	14	5583.69	948.508	323.035	330.199	99.564
H12	14	8114.34	1497.4	569.815	710.483	297.33				H12	14	7748.33	1437.31	554.282	571.541	313.082
A1	15	6350.64	1053.95	434.723	544.662	199.313				A1	15	7455.23	1195.39	686.586	543.228	54.8834
A2	15	3862.59	520.708	247.374	241.371	112.613				A2	15	4895.59	733.353	306.604	608.17	173.691
A3	15	5154.11	814.188	478.72	641.391	431.928				A3	15	6004.72	937.084	439.616	642.547	373.309
A4	15	6787.32	956.339	202.234	139.487	9.32281				A4	15	7596.86	1051.4	206.506	549.23	197.111
A5	15	3080.07	556.079	110.436	157.366	0				A5	15	3820.58	438.773	187.065	208.208	325.294
A6	15	2675.15	185.752	0	160.485	234.873				A6	15	3746.81	452.77	26.9038	206.338	83.8831
A7	15	2877.63	423.829	94.9879	193.743	0				A7	15	3288.18	650.167	87.2563	0	136.519
A8	15	3004.62	639.678	73.5424	160.899	157.524				A8	15	3448.11	322.406	127.944	148.28	49.2264
A9	15	4580.2	803.921	270.545	92.132	0				A9	15	5064.21	1050.63	386.091	386.675	0
A10	15	5696.08	872.808	529.376	707.461	0				A10	15	6747.6	1371.55	536.099	764.694	70.2116
A11	15	4580.72	947.452	253.387	455.339	532.185				A11	15	4969.93	786.276	333.502	428.554	0
A12	15	4733.91	806.774	382.97	550.885	0				A12	15	6041.41	961.609	404.797	736.852	221.726
B1	15	4934.96	869.339	319.778	366.02	295.014				B1	15	5842.97	863.731	411.143	881.647	196.676
B2	15	8732.34	1577.33	448.381	527.847	185.214				B2	15	9363.05	1580.82	486.784	404.369	112.387
B3	15	3575.75	491.32	222.071	271.92	0				B3	15	4051.15	678.382	297.927	547.129	117.209
B4	15	3349.05	370.668	280.881	359.265	67.1798				B4	15	4467.32	630.953	358.511	154.83	246.813
B5	15	5058.43	841.17	360.713	813.283	1265.42				B5	15	5730.04	863.868	301.068	1400.83	1343.5
B6	15	3664.03	666.605	368.176	211.536	0				B6	15	4566.41	760.529	135.791	269.668	346.357
B7	15	3998.91	532.094	161.602	256.945	451.98				B7	15	4521.67	616.92	304.031	111.239	16.6169
B8	15	3687.25	856.926	201.228	527.326	408.643				B8	15	4229.5	521.297	260.852	518.956	320.804
B9	15	4095.33	679.453	469.012	259.152	53.7693				B9	15	4593.24	777.464	316.279	351.606	63.258
B10	15	3030.96	547.622	355.25	278.883	0				B10	15	3255.6	478.778	225.33	389.211	0
B11	15	6739.75	1049.65	396.557	194.771	268.857				B11	15	7114.27	1092.13	380.371	279.121	273.836
B12	15	5367.37	1038.53	407.05	317.46	0				B12	15	5921.96	1264.38	397.435	545.68	370.627
C1	15	3988.44	765.945	279.497	104.592	174.411				C1	15	4775.14	1118.38	128.887	159.965	194.343
C2	15	4437.9	547.384	232.109	44.8278	199.695				C2	15	5424.91	911.394	322.878	246.553	280.783
C3	15	3774.14	569.308	192.191	275.587	87.4243				C3	15	4675.14	678.382	327.134	290.594	122.676
C4	15	3756.85	591.854	206.712	36.6783	39.1604				C4	15	4174.79	747.709	230.846	140.797	0
C5	15	3352.68	594.252	42.8737	103.693	12.7591				C5	15	3476.17	499.516	216.46	268.602	118.66
C6	15	3058.28	403.824	55.7809	64.1758	89.2642				C6	15	3288.14	523.737	306.306	313.748	428.964
C7	15	3069.96	485.076	29.445	524.712	67.5718				C7	15	3969.67	712.713	209.796	84.2685	244.207
C8	15	3113.19	688.704	312.951	406.463	0				C8	15	3679.63	664.315	384.482	354.161	191.198
C9	15	3129.35	610.511	203.825	393.009	102.912				C9	15	3993.87	680.908	143.193	387.272	162.408
C10	15	3723.48	756.675	429.283	132.82	179.032				C10	15	3837.89	528.618	445.133	636.996	203.103
C11	15	4599.73	720.307	405.524	365.981	0				C11	15	4690.07	851.002	567.452	447.158	111.941
C12	15	4112.58	844.943	211.812	422.725	441.426				C12	15	4142.15	673.645	366.291	358.721	274.599
D1	15	3382.52	602.512	239.943	361.615	130.373				D1	15	4106.05	659.278	170.626	341.176	220.004
D2	15	2786.95	523.025	177.78	64.167	244.873				D2	15	3407.43	545.587	298.592	149.418	300.526
D3	15	2601.34	532.949	266.556	91.33	3.2304				D3	15	3544.71	454.46	320.669	375.818	86.144
D4	15	2489.38	337.464	206.535	428.655	48.4645				D4	15	3116.29	443.444	211.573	116.366	279.603
D5	15	4755.53	892.596	178.735	152.951	0				D5	15	5589.88	957.05	321.506	666.708	2.8564
D6	15	3807.74	586.535	201.728	286.978	153.538				D6	15	4017.24	558.373	261.701	495.331	14.4847
D7	15	2912.59	517.266	236.062	70.62	157.834				D7	15	3574.54	547.329	258.971	543.415	274.552
D8	15	2365.67	397.553	62.0189	218.082	224.157				D8	15	3033.17	300.637	0	0	0
D9	15	2803	512.951	91.4515	278.425	87.942				D9	15	2990.36	405.397	169.585	178.317	214.846
D10	15	2498.01	541.416	285.674	376.655	229.543				D10	15	2805.22	367.39	308.712	315.222	23.1649
D11	15	2681.68	441.782	109.071	68.802	158.087				D11	15	2865.93	667.693	142.347	280.863	11.3596
D12	15	5093.5	993.286	507.247	393.984	393.285				D12	15	4991.76	517.248	412.675	287.415	175.143
E1	15	5376.56	641.642	287.341	394.81	253.66				E1	15	6377.21	920.78	357.744	378.165	221.263
E2	15	3802.81	554.218	282.421	202.164	101.021				E2	15	4397.75	748.814	257.583	490.97	337.026
E3	15	4102.37	691.67	370.269	495.889	419.581				E3	15	4503.67	628.15	371.503	600.356	246.977
E4	15	2999.34	620.426	274.556	423.243	113.897				E4	15	3757.06	526.968	272.116	332.951	106.201
E5	15	5646.64	1034.36	285.761	192.933	64.7023				E5	15	6368.72	918.762	223.735	454.956	53.1997
E6	15	3633.35	696.057	334.938	337.412	250.412				E6	15	4208.58	674.333	386.235	367.114	245.112
E7	15	3669.41	680.752	235.594	227.948	365.321				E7	15	3989.67	757.296	344.329	135.04	313.477
E8	15	2974.96	529.896	116.48	67.716	0				E8	15	3591.46	522.577	282.303	358.644	189.455
E9	15	2696.38	522.404	164.346	176.084	150.523				E9	15	3007.79	578.064	181.377	184.088	70.0351
E10	15	3181.81	671.188	237.493	367.506	0				E10	15	3043.25	582.247	239.334	242.595	15.9546
E11	15	3857.89	793.67	291.154	427.896	408.564				E11	15	3942.96	822.094	263.474	379.668	0
E12	15	3153.04	446.774	251.353	248.698	72.8198				E12	15	3095.3	560.962	125.676	187.375	0
F1	15	4469.08	677.571	273.421	320.35	167.82				F1	15	4226.77	518.218	241.353	315.063	37.2434
F2	15	5630.29	766.147	504.308	525.616	309.896				F2	15	6131.65	812.864	526.677	800.124	232.649
F3	15	5854.81	1060.95	398.304	643.936	280.274				F3	15	6641.78	985.864	569.334	801.494	255.334
F4	15	5032.86	872.804	291.612	464.977	282				F4	15	6145.92	1120.1	297.612	468.997	215.134
F5	15	4229.44	736.595	428.357	483.611	176.493				F5	15	4832.19	837.326	403.426	421.21	292.72
F6	15	2723.88	385.242	194.163	155.032	0				F6	15	3174.65	435.553	246.975	427.485	0
F7	15	3538.58	449.775	151.503	219.231	203.342				F7	15	3785.42	493.087	134.909	126.743	119.99
F8	15	3267.33	680.068	347.437	373.592	2.6861				F8	15	4123.46	753.799	369.547	205.23	295.471
F9	15	3325.91	508.471	326.443	354.415	313.393				F9	15	3417.57	762.234	330.449	409.722	546.671
F10	15	4153.94	727.628	0	0	0				F10	15	5653.33	1054.16	42.523	500.858	490.901
F11	15	4746.52	821.452	367.703	333.923	464.771				F11	15	4864.78	785.187	259.823	336.871	107.361
F12	15	4030.53	690.593	252.426	287.77	68.078				F12	15	4118.99	697.047	190.028	307.19	0
G1	15	8695.55	1246.95	605.516	820.651	397.684				G1	15	10075.2	1402.55	759.21	1072.93	415.926
G2	15	7609.87	935.791	601.219	721.485	283.272				G2	15	8749.86	1181.68	704.699	1052.24	187.434
G3	15	5228.56	819.374	501.245	609.649	304.42				G3	15	5693.03	834.889	442.689	607.568	209.245
G4	15	4460.15	741.214	425.739	624.788	394.409				G4	15	5470.25	801.004	431.879	698.053	462.591
G5	15	4524.98	608.011	206.078	286.615	69.6492				G5	15	4527.71	728.654	284.421	22.1896	0
G6	15	5911.98	1119.66	309.006	159.541	0				G6	15	6207.71	1098.85	338.679	522.441	0
G7	15	3397.79	566.756	259.583	327.251	114.863				G7	15	4179.95	749.992	358.362	404.506	324.268
G8	15	4721.24	718.035	249.631	224.302	50.6823				G8	15	5212.45	889.2	148.503	155.905	46.7072
G9	15	5303.91	945.529	272.559	271.017	296.524				G9	15	6147.78	980.122	377.939	484.131	291.95
G10	15	5731.35	827.459	328.81	380.723	184.987				G10	15	6129.52	857.406	254.583	475.904	170.717
G11	15	8013.91	1396.64	545.753	556.348	229.261				G11	15	9240.13	1617.92	640.46	846.509	232.674
G12	15	8526.42	1627.59	516.844	651.334	332.413				G12	15	8321.04	1526.6	454.419	524.661	275.95
H1	15	7229.28	1060.54	480.297	586.535	249.07				H1	15	8424.87	1108.62	486.84	704.042	250.971
H2	15	8280.19	1438.39	380.979	586.411	67.2965				H2	15	8043.25	1183.37	370.12	563.884	0
H3	15	6182.74	886.025	417.133	524.626	149.631				H3	15	6739.06	964.15	429.051	435.868	54.1219
H4	15	4022.09	704.483	316.581	377.152	120.42				H4	15	5234.95	1207.5	657.461	541.583	173.875
H5	15	7182.96	1230.87	169.959	314.319	268.316				H5	15	7790.11	1344.57	251.888	480.051	154.242
H6	15	4424.21	745.833	419.621	455.219	285.572				H6	15	5017.94	759.179	349.971	646.009	228.138
H7	15	3478.5	188.28	0	146.549	151.496				H7	15	4056.14	297.253	0	246.616	61.6554
H8	15	3684.44	653.697	211.008	174.637	80.5762				H8	15	3946.46	566.466	207.728	253.144	9.64984
H9	15	5732.97	1002.33	225.195	320.431	331.903				H9	15	5714.08	846.083	160.123	176.835	207.283
H10	15	8231.31	1221.68	413.071	660.537	226.941				H10	15	7959.02	1286.33	366.08	585.81	166.758
H11	15	5831.93	981.647	270.163	393.592	88.4452				H11	15	5961.84	944.089	304.981	348.941	109.167
H12	15	8442.23	1315.19	563.275	713.487	304.55				H12	15	8130.68	1515.82	445.551	500.192	290.766
A1	16	6690.74	1001.48	175.959	341.13	258.53				A1	16	7121.14	1384.73	507.176	718.093	441.956
A2	16	4044.4	582.048	199.757	148.617	221.409				A2	16	4629.49	770.157	243.89	530.172	211.865
A3	16	5259.51	890.998	438.431	492.311	457.638				A3	16	6037.38	1017.74	528.488	716.509	131.635
A4	16	6957.57	986.585	0	101.709	126.524				A4	16	7944.31	927.534	291.957	366.154	145.169
A5	16	3243.47	364.328	233.268	171.892	51.3047				A5	16	4214.83	510.961	140.862	197.313	17.4654
A6	16	2996.38	117.256	0	0	0				A6	16	3896.1	276.306	135.689	122.274	316.359
A7	16	3028.42	388.325	71.7931	198.498	81.2054				A7	16	3133.59	464.881	106.033	21.395	5.88445
A8	16	3094.01	449.725	69.5127	155.641	51.4142				A8	16	3687.27	438.431	39.2898	26.2908	24.0662
A9	16	4647.24	805.339	411.454	199.619	357.045				A9	16	5296.41	924.438	372	582.107	45.2154
A10	16	6064.3	1157.81	282.334	699.512	772.328				A10	16	6618.54	961.87	447.029	540.532	275.581
A11	16	4499.07	995.369	404.301	147.316	494.042				A11	16	5141.4	836.371	389.396	321.416	219.776
A12	16	4270.25	714.416	244.069	282.46	320.872				A12	16	5684.4	1097.43	438.53	787.73	627.322
B1	16	4860.51	867.937	383.288	406.48	395.173				B1	16	5923.89	888.969	518.108	875.06	365.125
B2	16	8841.21	1502.99	500.277	569.321	46.753				B2	16	8991.38	1753.88	542.832	486.373	149.25
B3	16	3397.62	485.685	175.898	328.935	0				B3	16	4397.77	669.367	417.757	471.473	200.189
B4	16	3678.46	440.168	300.641	180.384	0				B4	16	4435.54	610.512	152.438	248.028	332.978
B5	16	4919.14	604.841	262.724	1157.49	1219.88				B5	16	5674.87	854.522	426.039	1615.36	1540.31
B6	16	4049.43	611.815	177.789	599.083	256.074				B6	16	4533.19	690.086	228.185	347.178	277.414
B7	16	3683.14	524.382	253.359	169.208	0				B7	16	4216.51	597.641	267.054	100.271	99.7014
B8	16	3481.61	606.989	252.334	288.176	371.725				B8	16	4081.15	651.876	261.916	530.913	549.949
B9	16	3800.73	626.474	296.005	479.08	0				B9	16	4980.51	715.214	324.389	437.056	159.726
B10	16	2888.01	592.475	245.63	323.831	198.799				B10	16	3288.92	622.725	233.45	433.137	45.535
B11	16	6493.53	831.928	475.868	403.345	559.289				B11	16	6923.54	1315.15	312.39	602.717	38.171
B12	16	5375.87	982.065	464.742	394.996	163.731				B12	16	5437.49	1024.41	466.345	428.644	177.127
C1	16	4392.58	640.323	211.433	374.072	0				C1	16	4718.25	579.257	157.851	206.724	49.8316
C2	16	4601.67	749.916	226.923	225.319	191.223				C2	16	4955.53	848.445	285.274	319.693	0
C3	16	3806.8	740.899	267.16	634.395	194.59				C3	16	4389.32	599.902	346.217	653.495	538.647
C4	16	3699.13	489.266	113.324	345.486	0				C4	16	4214.82	723.049	235.043	265.03	316.844
C5	16	3312.99	489.947	165.221	183.649	22.9664				C5	16	3759.31	534.923	283.385	83.7038	275.597
C6	16	2894.56	538.726	80.2462	194.904	163.651				C6	16	3298.62	452.318	280.862	429.027	204.564
C7	16	2923.13	490.042	97.5366	386.512	161.224				C7	16	4133.73	647.319	202.435	226.963	246.578
C8	16	2807.01	603.923	227.368	324.274	380.748				C8	16	3888.49	615.537	342.33	283.926	458.216
C9	16	3462.76	495.206	295.417	35.8585	0				C9	16	3894.43	609.297	232.205	301.211	73.968
C10	16	3816.6	698.672	323.613	303.589	0				C10	16	4129.22	694.718	423.999	290.036	239.211
C11	16	3913.16	848.032	357.65	506.32	378.538				C11	16	4587.69	853.973	447.766	566.858	382.957
C12	16	3881.54	731.386	121.035	376.583	87.1041				C12	16	4295.57	623.603	267.552	159.266	178.637
D1	16	3576.97	506.907	205.285	200.461	0				D1	16	4293.71	520.849	201.73	164.299	45.9268
D2	16	2917.25	578.405	117.865	324.502	53.7978				D2	16	3673.19	510.719	280.912	215.418	151.19
D3	16	2741.71	422.483	269.562	199.456	53.84				D3	16	3386.12	587.213	237.495	333.827	195.978
D4	16	2711.37	356.057	126.944	200.672	161.548				D4	16	3155.37	536.409	243.813	90.2432	115.569
D5	16	4703.66	921.893	305.158	398.717	154.246				D5	16	5706.81	1049.83	274.642	303.287	232.797
D6	16	3737.62	559.344	127.579	174.283	98.496				D6	16	4070.71	656.453	351.115	418.018	63.7327
D7	16	2913.38	511.96	229.09	296.844	80.9067				D7	16	3542.83	538.487	329.69	272.905	433.713
D8	16	2308.56	516.226	0	0	0				D8	16	2942.14	438.1	54.2665	0	206.461
D9	16	2742.26	464.138	120.752	132.434	269.392				D9	16	3075.98	546.045	92.3394	59.439	74.5837
D10	16	2643.89	469.596	246.048	317.236	29.4826				D10	16	2794.92	490.774	258.949	269.903	81.0771
D11	16	2761.75	476.924	167.304	287.46	57.7445				D11	16	2755.96	364.47	100.752	230.911	142.941
D12	16	5150.31	1109.81	427.414	441.349	181.435				D12	16	4919.09	558.457	319.332	217.445	109.071
E1	16	5331.23	888.932	344.646	234.356	156.47				E1	16	6366.47	879.565	359.381	394.81	135.101
E2	16	3670.15	541.817	190.427	429.708	150.66				E2	16	4475.13	643.885	303.58	322.938	364.023
E3	16	3593.01	629.326	298.684	379.52	82.7935				E3	16	4691.09	856.354	382.611	510.435	174.007
E4	16	3134.61	503.322	195.24	323.076	281.664				E4	16	3663.49	655.332	373.397	299.092	210.864
E5	16	5643.97	994.153	190.507	170.772	0				E5	16	6639.38	1245.46	352.217	241.166	0
E6	16	3721.91	637.222	186.077	373.054	367.006				E6	16	4377.73	738.598	480.782	546.512	45.0476
E7	16	3579.33	531.736	181.226	0	0				E7	16	4151.94	591.18	288.149	353.265	198.937
E8	16	3038.73	552.584	127.805	154.242	4.17915				E8	16	3498.3	597.962	195.752	181.83	64.0803
E9	16	2710.1	504.911	189.041	356.171	91.9864				E9	16	2822.59	503.321	267.382	359.172	298.956
E10	16	3338.73	596.918	179.501	402.605	121.255				E10	16	3197.67	599.668	280.757	235.369	0
E11	16	4037.97	676.697	256.297	404.295	219.918				E11	16	3949.59	798.043	93.2923	347.858	247.156
E12	16	3305.64	681.801	252.32	83.4672	0				E12	16	2923.11	426.819	219.45	64.7297	85.0928
F1	16	4192.62	646.975	229.539	264.388	87.0509				F1	16	4236.76	619.566	230.101	307.572	195.64
F2	16	5783.29	758.88	490.073	641.719	330.798				F2	16	6690.68	663.372	511.425	770.423	32.7163
F3	16	5665.98	849.845	387.973	519.487	324.215				F3	16	6565.82	1027.21	498.167	787.794	0
F4	16	4792.73	948.895	357.615	117.919	0				F4	16	6197.09	1289.07	321.613	455.597	58.1444
F5	16	4318.05	674.687	361.497	332.808	302.764				F5	16	4630.97	678.884	260.641	421.21	233.889
F6	16	2668.97	518.208	187.173	258.692	230.858				F6	16	3072.67	424.054	182.513	308.229	34.53
F7	16	3619.74	465.767	145.731	140.445	91.5953				F7	16	3830.2	465.767	79.3585	197.822	234.484
F8	16	3402.55	581.114	383.234	190.483	102.072				F8	16	4130.22	674.247	238.995	415.375	235.034
F9	16	3181.64	627.777	411.559	287.821	220.318				F9	16	3762.97	643.874	333.453	294.593	377.014
F10	16	4079.07	598.335	0	0	0				F10	16	5497.75	969.227	158.075	379.608	356.371
F11	16	4795.8	839.163	359.346	528.526	233.424				F11	16	4823.57	835.79	262.862	224.826	139.916
F12	16	4109.04	833.66	333.732	308.073	201.773				F12	16	4305.87	630.354	279.843	298.363	128.774
G1	16	8449.92	1204.61	555.52	800.85	330.552				G1	16	9713.36	1369.74	698.103	1162.41	312.309
G2	16	7384.17	1006.92	686.072	646.938	234.081				G2	16	8651.33	1126.81	665.376	1063.38	196.764
G3	16	5280.57	761.005	508.272	653.344	229.539				G3	16	5576.54	781.693	406.774	511.162	188.95
G4	16	4732.34	689.015	274.274	607.489	335.667				G4	16	5487.92	952.853	403.224	447.731	315.737
G5	16	4513.38	756.618	278.46	326.372	334.888				G5	16	4765.11	751.824	221.406	330.995	219.443
G6	16	5884.88	1090.34	274.218	110.106	0				G6	16	6327.64	1068.59	354.027	411.212	0
G7	16	3301.23	499.285	216.702	139.754	316.316				G7	16	3994.07	656.243	314.715	397.562	169.644
G8	16	4468.39	798.483	280.607	236.372	0				G8	16	5330.82	671.821	245.986	210.221	111.302
G9	16	5262.74	894.025	243.243	238.044	179.134				G9	16	5975.21	870.194	358.13	349.829	249.263
G10	16	5644.31	817.043	302.432	326.499	69.7666				G10	16	5945.85	796.21	249.062	498.978	228.327
G11	16	8040.64	1395.87	485.114	600.61	172.941				G11	16	9103.14	1709.81	638.416	822.534	258.843
G12	16	8553.5	1662.67	466.353	668.404	221.078				G12	16	8299.6	1456.43	357.109	424.939	175.749
H1	16	7691.33	1017.96	455.431	595.574	381.21				H1	16	8320.59	1081.15	492.075	715.09	253.823
H2	16	8227.89	1185.99	453.374	522.349	229.357				H2	16	8113.69	1290.8	360.166	616.682	60.4295
H3	16	5964.3	844.665	432.03	609.423	216.488				H3	16	6545.11	912.679	392.303	607.045	249.916
H4	16	4039.44	596.052	345.046	426.053	156.253				H4	16	5308.83	1194.67	508.196	532.414	123.357
H5	16	7014.87	1268.24	240.558	231.861	103.631				H5	16	7835.67	1519.5	284.137	377.183	218.509
H6	16	4362.81	746.618	409.302	347.272	31.9074				H6	16	5027.26	701.083	329.334	594.964	225.745
H7	16	3499.53	172.54	0	151.714	112.154				H7	16	3965.38	366.269	0	174.31	79.8584
H8	16	3482.63	504.766	173.835	203.476	137.028				H8	16	4024.51	664.866	173.289	189.591	80.5762
H9	16	5445.42	1098.14	152.08	279.214	415.192				H9	16	5624.52	849.768	97.2433	132.294	197.263
H10	16	9414.31	1433.62	426.714	485.728	142.308				H10	16	9013.23	1364.06	397.155	567.795	250.137
H11	16	6584.92	1075.17	271.452	411.232	224.398				H11	16	6744.62	1146.6	225.673	423.911	102.596
H12	16	9432.42	1482.86	549.377	769.815	222.505				H12	16	8909.55	1709.65	545.289	688.703	238.914
A1	17	5959.36	1056.23	184.585	326.797	350.965				A1	17	7659.89	784.757	619.307	652.161	155.984
A2	17	3606.41	700.638	144.011	452.175	309.209				A2	17	4976.58	798.782	261.311	384.717	324.478
A3	17	4898.78	815.468	468.055	646.014	279.725				A3	17	5906.75	1045.9	520.193	715.354	346.571
A4	17	7280.69	1015.39	116.783	252.82	123.86				A4	17	7952.99	1181.02	168.053	348.718	0
A5	17	3299.24	570.743	104.802	58.1045	0				A5	17	4162.95	514.345	171.289	19.3682	0
A6	17	2459.22	154.406	0	0	101.858				A6	17	3878.77	166.016	0	199.969	27.5616
A7	17	2916.91	477.085	93.8833	30.9039	0				A7	17	3204.55	404.968	163.467	55.8647	220.078
A8	17	2803.77	445.618	32.2378	102.008	30.6298				A8	17	3269.32	410.708	96.7133	274.475	0
A9	17	4753.53	879.067	188.818	319.67	0				A9	17	5231	704.671	435.409	869.671	285.324
A10	17	5806.17	958.307	480.64	670.896	423.025				A10	17	6554	917.339	556.265	718.59	254.517
A11	17	4180.62	1017.15	381.944	728.207	214.327				A11	17	5405.42	681.73	523.542	262.824	63.5715
A12	17	4043.06	741.58	422.656	380.707	465.084				A12	17	5712.22	1119.16	311.535	821.064	461.478
B1	17	5070.92	891.774	474.653	270.045	193.944				B1	17	5710.24	724.917	427.857	844.01	362.394
B2	17	8682.28	1759.69	451.495	422.278	293.105				B2	17	9102.76	1686.51	511.695	637.187	182.516
B3	17	3621.48	439.483	187.991	273.016	0				B3	17	4119.75	664.859	317.715	43.858	321.548
B4	17	3880.73	343.413	237.125	297.634	67.1798				B4	17	4259.27	862.621	414.969	426.909	290.626
B5	17	5148.07	680.947	183.197	1267.95	1524.04				B5	17	5822.43	823.812	414.678	1253.54	1620
B6	17	4065.38	644.428	326.179	313.267	228.169				B6	17	4495.97	575.289	281.382	303.579	410.375
B7	17	4312.03	430.559	210.905	261.646	0				B7	17	4451.35	623.346	238.295	0	16.6169
B8	17	3456.03	561.082	199.099	278.61	393.366				B8	17	3714.88	696.762	258.722	499.823	518.123
B9	17	3923.83	626.474	386.563	135.88	131.26				B9	17	4793.79	711.24	352.773	233.937	63.258
B10	17	2831.05	584.13	255.78	245.172	332.072				B10	17	3536.12	530.933	279.125	63.3361	88.8488
B11	17	6649.58	962.913	314.008	246.914	313.666				B11	17	7001.57	952.292	438.641	302.125	89.6189
B12	17	4953.03	1127.26	224.358	617.365	270.9				B12	17	5530.98	877.204	326.922	433.033	0
C1	17	3458.74	757.221	228.811	123.05	0				C1	17	4881.08	757.221	331.631	209.185	321.414
C2	17	4285.83	595.28	285.274	199.366	169.438				C2	17	5286	585.701	217.846	186.389	463.533
C3	17	3798.63	518.762	178.561	469.316	57.8129				C3	17	4382.52	517.432	516.6	390.187	160.748
C4	17	3719.61	569.167	129.064	4.73268	0				C4	17	4258.57	600.732	227.698	165.644	0
C5	17	3234.48	546.406	206.003	213.632	103.349				C5	17	3522.03	577.984	292.796	552.195	3.82773
C6	17	3039.73	504.339	225.081	308.994	407.888				C6	17	3269.59	447.028	190.829	354.155	446.321
C7	17	2942.61	528.12	113.179	8.98864	158.853				C7	17	4159.2	632.419	229.119	83.1449	80.612
C8	17	3150.37	421.585	295.068	370.599	349.431				C8	17	3688.38	707.286	295.068	246.568	0
C9	17	3286.11	460.007	203.825	256.747	151.152				C9	17	3984.51	538.901	295.417	304.08	0
C10	17	3643.66	738.22	347.389	273.773	58.6743				C10	17	4159.82	757.994	433.245	352.381	239.211
C11	17	3974.89	766.348	433.686	250.408	360.863				C11	17	4544.02	843.577	504.089	535.213	310.784
C12	17	3851.96	823.772	477.771	175.639	391.23				C12	17	4511.82	846.868	332.847	430.168	0
D1	17	3337.29	461.096	166.183	245.269	34.8154				D1	17	4054.04	655.294	200.841	282.217	169.633
D2	17	2802.47	517.898	181.709	339.169	128.929				D2	17	3338.14	644.039	383.062	220.001	90.8997
D3	17	2585.85	463.181	101.211	292.886	10.768				D3	17	3119.06	594.965	359.75	300.234	27.9968
D4	17	2555.89	416.484	170.266	199.485	584.06				D4	17	2882.65	408.117	166.236	128.24	2.48536
D5	17	4635.96	791.031	148.22	397.41	101.402				D5	17	5262.82	1022.48	255.025	171.252	181.381
D6	17	3574.58	671.99	138.483	228.01	541.728				D6	17	3999.71	610.812	294.413	338.083	0
D7	17	2918.93	424.423	166.339	263.329	232.109				D7	17	3738.64	383.749	312.758	162.785	233.436
D8	17	2096.18	355.029	0	0	0				D8	17	2874.32	451.945	29.902	40.973	45.7163
D9	17	2650.78	515.433	186.455	163.718	0				D9	17	2930.34	508.815	100.33	154.333	26.7166
D10	17	2722.84	427.24	299.497	359.535	350.632				D10	17	2612.14	415.27	263.557	209.477	268.502
D11	17	2465.6	578.333	146.044	157.396	0				D11	17	2890.04	447.806	132.179	210.176	0
D12	17	4913.8	970.55	445.837	398.29	407.968				D12	17	4590.09	866.816	362.319	363.843	306.238
E1	17	5414.72	781.211	284.067	467.38	60.6578				E1	17	6212.62	899.236	357.744	425.436	242.631
E2	17	3485.24	742.137	186.748	457.714	155.885				E2	17	4446.99	737.367	378.095	547.856	225.555
E3	17	3712.08	526.987	214.756	654.573	632.879				E3	17	4791.42	788.128	327.071	547.461	242.767
E4	17	2961.71	406.486	237.949	138.259	0				E4	17	3878.09	584.394	279.437	81.827	175.463
E5	17	5786.42	923.788	250.318	269.845	247.307				E5	17	6521.86	1316.83	428.641	616.603	0
E6	17	3729.88	496.925	229.327	349.293	42.3978				E6	17	4041.04	715.97	214.24	470.476	11.9244
E7	17	3674.41	682.381	231.969	183.654	153.121				E7	17	4059.01	613.98	358.827	289.526	320.711
E8	17	2932.44	642.608	173.912	225.72	90.5482				E8	17	3469.53	549.657	281.494	229.482	0
E9	17	2604.46	490.599	172.861	94.0451	0				E9	17	2902.84	607.484	249.499	275.132	1.0453
E10	17	3192.66	638.179	279.837	353.053	124.446				E10	17	3080.81	619.841	222.765	382.991	245.701
E11	17	3717.58	910.644	396.749	318.1	245.138				E11	17	3935.23	688.722	353.691	311.944	465.057
E12	17	3359.26	580.917	141.144	313.428	92.4566				E12	17	3324.2	333.695	132.444	239.329	185.731
F1	17	4255.08	671.197	221.1	337.976	116.217				F1	17	4354.17	632.315	213.786	370.143	156.153
F2	17	5764.46	787.948	471.772	397.812	439.852				F2	17	6501.2	768.224	477.872	587.718	416.224
F3	17	5909.66	923.839	398.304	810.628	287.399				F3	17	6553.16	1015.24	510.793	437.283	287.399
F4	17	4942.32	1037.29	264.011	242.538	308.165				F4	17	6063.25	1199.55	198.008	221.098	49.4227
F5	17	4394.67	678.884	338.833	521.312	169.318				F5	17	4724.2	762.827	276.506	393.909	390.293
F6	17	2745.61	442.741	180.96	246.767	0				F6	17	3184.3	505.271	159.99	136.685	125.295
F7	17	3374.58	511.745	117.595	93.3444	93.4272				F7	17	3836.35	497.751	77.1942	196.109	0
F8	17	3525.1	767.381	352.701	379.736	153.108				F8	17	4265.44	704.322	371.653	337.953	0
F9	17	3319.97	552.974	215.292	366.831	227.387				F9	17	3725.63	664.706	329.447	487.603	366.411
F10	17	4264.79	604.941	0	0	232.532				F10	17	5447.19	914.49	133.116	341.367	442.791
F11	17	4755.48	779.283	347.95	437.122	235.502				F11	17	4699.93	747.235	300.088	527.052	39.4813
F12	17	4117.89	690.593	279.843	368.982	0				F12	17	4142.21	485.136	280.788	166.836	132.875
G1	17	8423.44	1110.4	563.852	822.851	488.896				G1	17	9758.96	1388.79	740.693	1031.13	457.519
G2	17	7512.49	1123.76	537.061	921.136	176.409				G2	17	8864.44	1311.73	715.047	866.297	218.815
G3	17	5110.61	761.005	345.094	655.425	268.729				G3	17	5483.5	913.945	462.988	610.342	202.946
G4	17	4769.45	745.01	296.789	556.611	225.526				G4	17	5542.71	753.551	382.755	437.555	131.12
G5	17	4378.99	676.722	315.929	312.503	174.6				G5	17	4514.75	625.588	376.39	251.482	199.406
G6	17	5995.77	1082.78	273.194	234.818	0				G6	17	6213.46	1129.12	442.022	0	0
G7	17	3283.13	482.239	195.261	299.473	62.733				G7	17	4188.4	664.766	258.051	366.312	80.4043
G8	17	4698.69	718.035	242.342	299.74	20.8692				G8	17	5137.56	859.246	121.171	140.818	51.6761
G9	17	5322.12	847.901	282.067	376.367	111.292				G9	17	5998.96	979.353	469.848	375.563	233.255
G10	17	5633.35	884.099	275.44	378.416	190.801				G10	17	6050.02	845.037	266.852	550.318	155.918
G11	17	7747.44	1320.83	508.28	543.438	316.3				G11	17	9021.28	1575.04	604.349	828.682	362.38
G12	17	8344.74	1593.57	414.026	716.917	236.188				G12	17	7941.89	1555.3	348.847	557.901	309.351
H1	17	7466.6	1177.31	320.634	566.448	377.407				H1	17	8532.74	930.036	502.545	702.034	356.493
H2	17	8254.58	1144.95	426.226	428.721	43.262				H2	17	8159.58	1146.69	401.793	539.245	0
H3	17	6120.48	802.386	417.133	469.945	132.121				H3	17	6277.67	883.268	356.549	619.725	107.448
H4	17	3982.91	650.588	324.912	485.346	199.721				H4	17	5281.2	1129.87	590.813	617.991	283.135
H5	17	7005.45	1231.67	252.76	380.448	221.722				H5	17	7685.65	1319.93	305.927	254.721	218.509
H6	17	4493.37	748.188	307.837	838.473	48.6588				H6	17	5003.95	737.982	399.844	637.641	24.7283
H7	17	3577.68	187.675	0	143.967	130.357				H7	17	3890.24	438.917	0	183.994	0
H8	17	3533.37	603.699	212.648	221.1	115.316				H8	17	4130.99	677.1	209.368	353.013	131.72
H9	17	5625.34	969.9	184.251	160.216	170.962				H9	17	5667.25	922.732	135.263	187.472	123.994
H10	17	11635	1580.09	435.051	549.78	227.568				H10	17	10900.9	1577.63	416.861	535.102	275.84
H11	17	8309.34	1096.53	277.9	375.401	53.0671				H11	17	8522.83	1274	281.124	422.257	151.115
H12	17	11022.8	1834.68	523.216	627.118	173.935				H12	17	10331.1	1800.76	513.406	564.781	379.374
A1	18	6440.93	1058.51	419.197	404.196	10.1101				A1	18	7175.32	1138.35	483.025	805.526	177.649
A2	18	3895.65	622.941	144.011	125.428	229.998				A2	18	4996.41	860.122	324.025	479.579	370.287
A3	18	5171.93	812.908	270.169	620.589	0				A3	18	6288.26	1031.82	561.666	874.835	411.36
A4	18	6670.92	820.954	210.779	124.957	0				A4	18	7859.18	1094.61	170.902	37.7777	61.2642
A5	18	3261.63	579.766	81.1368	3.63153	0				A5	18	4020.3	547.056	137.482	81.1042	117.892
A6	18	2792.45	179.947	0	118.453	171.361				A6	18	3892.1	306.491	160.253	199.969	185.741
A7	18	2932.12	154.221	0	89.1457	0				A7	18	3204.55	505.932	78.4202	145.01	101.213
A8	18	3155.54	400.44	46.3418	219.791	276.762				A8	18	3026.67	388.119	45.3343	486.905	0
A9	18	4516.42	584.154	271.954	217.767	0				A9	18	5126.35	750.043	219.818	462.056	389.788
A10	18	6223.74	1086.56	531.057	542.122	329.995				A10	18	6379.38	1202.34	747.849	634.33	161.487
A11	18	4496.35	764.496	314.871	346.526	248.837				A11	18	5595.94	1117.34	421.07	736.578	523.103
A12	18	4571.63	760.595	198.43	459.655	504.742				A12	18	5874.5	1415.25	488.138	880.714	198.292
B1	18	4879.93	964.686	441.227	245.581	213.976				B1	18	5873.72	961.882	447.912	931.516	94.6958
B2	18	8617.21	1427.5	481.595	597.598	52.1476				B2	18	9271.7	1613.34	459.799	577.804	237.361
B3	18	3528.81	521.745	292.43	417.747	249.977				B3	18	4267.79	721.203	314.417	234.64	321.548
B4	18	3575.88	346.139	114.328	208.945	0				B4	18	4452.87	633.679	210.308	449.457	360.726
B5	18	5292.87	715.662	261.304	1251.94	1273.56				B5	18	5679.01	978.694	330.89	1741.83	1463.86
B6	18	4118.54	713.567	233.785	368.17	162.508				B6	18	4291.31	770.965	314.98	516.73	185.49
B7	18	3705.7	569.366	239.664	119.072	0				B7	18	4199.26	762.153	160.233	155.107	0
B8	18	3744.55	670.239	212.94	560.807	357.721				B8	18	4102.63	878.349	333.251	501.019	239.33
B9	18	4070.43	590.714	441.98	600.952	77.4911				B9	18	4793.79	717.863	455.496	196.115	321.034
B10	18	3010.54	315.013	341.04	372.866	305.418				B10	18	3384.58	534.062	189.805	310.551	0
B11	18	6980.76	886.8	483.961	19.9372	0				B11	18	7348.35	938.132	338.287	427.883	165.961
B12	18	5348.25	826.79	575.319	279.423	0				B12	18	5649.98	1082.89	312.499	602.735	224.757
C1	18	3964.9	500.743	246.189	156.273	450.976				C1	18	4941.9	640.323	283.841	66.447	188.114
C2	18	4522.71	692.441	235.999	129.765	117.396				C2	18	5073.97	826.55	335.845	507.262	133.13
C3	18	4016.4	333.87	301.236	145.979	427.251				C3	18	4428.79	744.89	445.721	266.037	74.7337
C4	18	3655.39	611.583	132.212	31.9456	0				C4	18	4146.87	893.7	230.846	260.297	123.415
C5	18	3379.14	414.35	84.7017	163.66	0				C5	18	3536.15	669.85	275.019	373.544	176.076
C6	18	3013.12	406.469	103.733	165.193	94.2233				C6	18	3328.46	514.92	183	386.243	101.662
C7	18	3097.68	536.398	127.902	221.345	347.343				C7	18	3932.96	744.997	266.846	513.476	109.063
C8	18	3102.26	569.081	209.485	0	191.198				C8	18	3839.28	593.47	288.681	466.237	222.515
C9	18	3453.4	652.992	300.577	341.373	239.592				C9	18	3951.75	548.61	304.447	48.7676	122.208
C10	18	3627.7	752.721	348.71	345.604	0				C10	18	4145.18	763.267	590.429	360.512	180.536
C11	18	3858.96	705.456	499.865	354.974	188.532				C11	18	4521.44	803.477	591.389	590.248	51.5519
C12	18	4046.04	735.235	222.96	273.878	395.659				C12	18	4132.91	689.043	412.476	105.681	131.394
D1	18	3684.36	460.1	164.406	255.489	192.596				D1	18	3956.82	633.385	210.617	277.5	91.8535
D2	18	2785.92	517.898	231.802	55.0003	0				D2	18	3661.82	615.324	235.731	202.585	99.2476
D3	18	2785.46	406.01	325.679	238.298	351.037				D3	18	3088.07	556.205	302.631	241.447	268.123
D4	18	2461.11	398.821	214.595	141.302	224.925				D4	18	2942.52	441.585	215.603	238.669	0
D5	18	4934.88	907.245	219.06	468.003	158.53				D5	18	5626.8	1035.18	195.083	393.488	278.499
D6	18	3655.22	509.819	111.223	290.909	31.8663				D6	18	4125.05	764.243	339.121	313.186	475.098
D7	18	2942.71	526.992	94.6241	531.446	147.224				D7	18	3533.31	447.413	263.951	181.936	153.855
D8	18	2286.25	430.188	3.32244	87.2329	179.916				D8	18	2893.96	451.945	16.6122	83.2677	0
D9	18	2778.12	431.872	130.518	128.263	0				D9	18	3015.97	505.505	129.63	234.628	81.2629
D10	18	2691.09	596.663	322.535	195.377	207.431				D10	18	2683.36	371.073	199.972	247.747	200.061
D11	18	2597.76	606.446	116.466	183.786	82.3569				D11	18	2874.61	506.041	145.12	146.086	70.0507
D12	18	4897.95	1129.7	517.072	533.924	503.405				D12	18	4878.13	697.716	363.547	493.019	242.264
E1	18	5380.13	839.287	282.429	378.831	153.712				E1	18	6337.85	918.907	297.983	379.497	72.3758
E2	18	3522.42	532.278	285.181	300.183	0				E2	18	4562.56	655.331	308.18	429.708	74.8947
E3	18	3742.95	491.698	203.648	294.889	91.2132				E3	18	4709.84	736.37	375.206	306.79	298.899
E4	18	2939.33	449.274	168.395	441.584	0				E4	18	3410.24	566.378	229.407	93.1135	0
E5	18	5705.4	862.47	285.761	155.128	330.701				E5	18	6469.33	1181.12	435.287	542.298	153.848
E6	18	3689.99	696.057	242.403	0	27.8235				E6	18	4208.58	772.994	369.136	565.521	363.031
E7	18	3563.61	635.152	195.724	202.02	0				E7	18	4054.72	737.753	272.745	210.662	349.647
E8	18	2953.07	433.285	189.28	33.858	0				E8	18	3450.15	568.686	236.196	199.386	50.1498
E9	18	2821.9	419.832	160.94	39.0187	0				E9	18	2892.55	605.098	264.827	314.151	420.211
E10	18	3160.94	677.607	316.658	379.894	328.665				E10	18	3201.84	670.271	338.75	329.31	0
E11	18	3798.23	686.536	301.406	194.965	232.024				E11	18	3966.16	769.62	272.701	395.06	138.206
E12	18	3063.34	502.205	177.881	97.9462	0				E12	18	3139.64	678.475	136.311	93.6877	0
F1	18	4139.33	534.79	272.859	218.561	107.243				F1	18	4076.88	622.753	263.857	409.361	100.961
F2	18	5891.56	731.889	393.482	553.517	0				F2	18	6359.97	698.668	478.889	709.221	258.095
F3	18	6016.21	933.633	420.113	504.645	167.452				F3	18	6570.04	1156.7	304.18	646.219	191.204
F4	18	4965.94	952.252	266.411	423.437	369.217				F4	18	5884.14	1024.99	308.413	0	31.9794
F5	18	4372.51	592.843	296.904	319.807	328.592				F5	18	4741.73	608.582	254.974	279.506	0
F6	18	2811.38	344.993	222.122	212.825	197.314				F6	18	3136.63	475.084	271.051	352.262	138.12
F7	18	3550.9	489.089	98.116	175.556	108.082				F7	18	3742.32	414.46	75.0299	0	0
F8	18	3448.19	719.844	361.124	325.664	0				F8	18	4411.65	710.142	237.942	227.35	92.6704
F9	18	3075.55	614.521	324.441	172.693	41.236				F9	18	3662.83	628.724	372.506	532.751	216.783
F10	18	4123.8	546.429	0	0	0				F10	18	5201.18	884.29	98.9123	356.29	316.279
F11	18	4665.89	877.959	407.967	301.489	135.76				F11	18	4889.87	753.982	344.911	395.842	135.76
F12	18	4485	733.621	285.515	504.039	60.6961				F12	18	4212.98	718.561	191.919	397.229	0
G1	18	8454.33	1237.42	646.254	841.186	430.52				G1	18	9635.41	1452.3	726.805	968.794	427.601
G2	18	7309.69	997.771	684.003	862.869	17.8105				G2	18	9000.78	1159.32	607.428	1085.66	310.412
G3	18	5178.74	761.005	480.946	622.827	373.701				G3	18	5572.88	779.476	410.678	617.972	334.512
G4	18	4788.9	694.71	309.07	386.677	261.191				G4	18	5508.25	910.146	468.722	522.013	296.856
G5	18	4430.15	595.227	323.593	231.141	199.406				G5	18	4505.88	643.964	212.89	163.648	264.285
G6	18	5970.31	1096.02	278.31	0	0				G6	18	6418	1054.41	389.839	168.53	0
G7	18	3277.09	584.511	244.268	419.263	155.507				G7	18	3986.83	690.334	311.652	388.881	305.713
G8	18	4627.83	800.194	259.652	194.127	120.246				G8	18	5174.6	788.213	184.034	309.799	120.246
G9	18	5208.91	818.69	190.158	266.192	83.0876				G9	18	6227.74	957.829	326.438	447.137	140.258
G10	18	5556.59	887.354	339.852	301.117	116.806				G10	18	6155.56	877.588	239.246	462.636	126.32
G11	18	8063.19	1493.11	481.707	650.404	263.394				G11	18	9249.32	1583.47	539.621	774.584	213.332
G12	18	8283.8	1613.77	552.647	692.66	187.678				G12	18	8205.94	1483.01	481.041	539.934	329.232
H1	18	7189.72	1026.2	447.579	594.569	90.3116				H1	18	8725.11	875.085	389.996	727.142	233.859
H2	18	7895.96	1317	335.732	472.367	94.7645				H2	18	8073.13	1148.44	326.683	455.472	146.954
H3	18	6002.07	974.26	434.017	562.666	284.936				H3	18	6349.13	926.466	432.03	485.002	294.487
H4	18	4118.45	615.942	298.531	423.608	59.9164				H4	18	5359.58	1294.12	557.488	571.535	169.176
H5	18	6930.04	1253.13	159.5	176.345	65.0707				H5	18	7646.38	1304.82	312.899	339.628	226.542
H6	18	4364.37	530.719	368.888	648.519	184.265				H6	18	5009.39	796.863	374.047	562.329	165.121
H7	18	3776.03	112.605	0	138.157	235.465				H7	18	4042.92	377.166	0	87.1549	145.037
H8	18	3676.08	614.336	155.796	241.395	93.121				H8	18	4019.5	728.693	183.128	238.19	124.483
H9	18	5861.96	843.872	157.929	303.811	154.68				H9	18	5769.12	767.96	132.339	78.4458	101.45
H10	18	15491.2	2064.51	451.726	609.829	253.898				H10	18	14385.5	1913.13	360.774	521.757	234.464
H11	18	11111.9	1530.28	299.823	307.598	278.981				H11	18	11341.2	1695.97	245.661	325.789	13.1404
H12	18	14055.5	2074.07	547.742	636.13	341.306				H12	18	13295.2	2207.82	502.778	654.906	236.289
A1	19	5513.92	1022.01	374.345	163.398	368.297				A1	19	7313.77	1156.6	396.771	703.76	395.738
A2	19	4069.19	582.048	173.046	288.801	97.3435				A2	19	5209.63	746.984	299.636	497.497	232.861
A3	19	4805.26	558.154	347.19	538.538	409.303				A3	19	5829.55	793.705	458.576	613.655	397.991
A4	19	6775.16	998.107	148.115	26.1538	0				A4	19	7836.6	1101.81	244.959	229.572	163.815
A5	19	3217.53	371.096	75.5023	284.47	0				A5	19	3982.69	570.743	56.345	128.314	24.015
A6	19	2581.85	188.074	0	87.8846	0				A6	19	4214.66	291.398	32.7524	273.843	61.1148
A7	19	2981.53	409.406	118.183	0	0				A7	19	3299.58	614.663	154.631	0	150.642
A8	19	3196.18	532.894	18.1337	0	133.458				A8	19	3251.91	519.546	75.5572	87.2853	0
A9	19	4398.69	742.953	128.227	258.249	0				A9	19	5491	880.485	290.273	288.96	221.399
A10	19	5753.02	1143.56	527.696	484.889	0				A10	19	6732.42	1186.31	584.835	459.452	87.7645
A11	19	4632.44	640.347	340.955	41.851	101.714				A11	19	5280.21	1191.39	534.721	383.355	383.246
A12	19	4692.18	736.147	313.519	298.25	0				A12	19	6444.79	1029.52	309.551	498.252	214.515
B1	19	5255.43	821.666	368.804	432.826	191.213				B1	19	5572.67	870.741	518.108	982.326	455.268
B2	19	8831.2	1676.06	413.092	483.546	200.498				B2	19	9363.05	1578.49	473.292	640.957	226.572
B3	19	3457.8	389.9	227.568	289.463	150.401				B3	19	4459.15	543.156	361.689	253.28	47.7135
B4	19	3622.11	588.708	177.844	172.868	0				B4	19	4405.2	674.561	221.599	452.463	242.431
B5	19	5008.78	766.399	198.818	1261.55	1164.58				B5	19	5589.37	539.417	285.446	1484.08	1354.88
B6	19	3913.88	495.714	221.186	301.964	0				B6	19	4250.11	735.744	394.775	259.98	68.943
B7	19	3728.25	548.802	361.551	372.884	358.925				B7	19	4338.57	553.943	282.119	368.184	0
B8	19	3468.31	656.977	237.428	435.253	412.462				B8	19	4037.15	581.485	283.21	428.078	101.842
B9	19	3889.25	769.517	266.269	340.399	131.26				B9	19	4849.11	737.73	410.892	184.908	0
B10	19	3205.08	528.847	240.555	333.025	88.8488				B10	19	3294.29	610.208	141.085	415.771	0
B11	19	6346.15	1028.4	372.278	300.591	0				B11	19	6587.16	994.774	296.204	225.444	355.157
B12	19	5380.12	1159.52	424.678	288.201	312.577				B12	19	5930.46	867.121	286.858	490.088	236.665
C1	19	4035.53	638.578	366.387	92.2875	98.4174				C1	19	5124.35	532.149	172.332	191.958	252.895
C2	19	4459.83	707.494	281.384	152.179	54.4622				C2	19	5315.24	766.338	280.087	298.459	174.279
C3	19	4064.04	579.95	297.147	394.28	373.669				C3	19	4529.51	642.467	358.485	555.266	133.957
C4	19	3523.21	594.814	73.451	123.05	0				C4	19	4120.8	725.022	327.382	149.079	0
C5	19	3116.29	442.101	243.648	323.571	424.878				C5	19	3319.16	520.569	270.836	293.588	347.048
C6	19	2813.91	406.469	202.573	331.575	482.274				C6	19	3067.96	611.908	216.273	98.6405	213.242
C7	19	2844.47	368.359	254.883	0	130.402				C7	19	3967.42	672.152	246.602	288.76	261.989
C8	19	3153.65	547.015	258.025	215.186	435.141				C8	19	3832.72	628.312	346.162	107.593	97.2473
C9	19	3371.51	600.801	252.846	106.141	440.592				C9	19	3789.14	605.656	299.287	251.01	1.608
C10	19	3917.7	773.813	446.454	344.249	0				C10	19	4122.57	696.036	466.267	149.084	120.358
C11	19	4071.25	577.731	356.242	551.724	284.272				C11	19	4497.35	879.221	409.748	540.717	147.291
C12	19	4132.91	952.727	375.846	220.294	104.82				C12	19	4484.1	821.847	224.552	327.463	73.817
D1	19	3699.06	571.64	161.74	194.172	175.559				D1	19	4135.44	445.162	231.945	230.333	140.003
D2	19	2812.81	604.043	166.976	24.7501	0				D2	19	3584.26	497.387	311.361	463.836	300.526
D3	19	2773.61	397.289	267.558	465.048	295.043				D3	19	3222.97	604.655	265.554	191.058	0
D4	19	2481.06	297.489	161.198	251.731	80.7742				D4	19	2998.23	458.318	155.153	328.913	0
D5	19	4866.31	866.228	287.72	333.354	519.865				D5	19	5616.25	960.957	317.146	499.377	0
D6	19	3595.62	673.932	201.728	352.498	388.19				D6	19	3868.22	648.684	286.78	630.302	350.53
D7	19	2785.74	454.487	248.015	119.695	216.193				D7	19	3546	537.603	268.932	338.737	478.809
D8	19	2236.28	491.502	0	0	116.503				D8	19	2678.89	415.354	0	170.501	84.059
D9	19	2661.02	355.757	180.239	0	0				D9	19	2805.2	541.908	169.585	0	0
D10	19	2649.04	511.951	204.579	341.407	0				D10	19	2744.29	492.615	184.306	103.731	109.507
D11	19	2636.34	392.584	73.0221	0	54.9046				D11	19	2616.09	653.637	177.471	130.064	70.0507
D12	19	5142.38	1021.71	443.38	572.677	432.089				D12	19	4792.25	859.711	367.232	296.026	268.483
E1	19	5424.26	741.87	275.88	330.229	19.9895				E1	19	6149.41	973.235	364.293	473.372	249.524
E2	19	3390.77	575.203	251.143	375.448	137.597				E2	19	4462.07	670.594	331.178	502.348	171.561
E3	19	3538.99	461.113	378.909	284.31	377.482				E3	19	4792.52	531.692	433.215	322.658	290.479
E4	19	2924.08	653.08	207.443	53.6108	158.532				E4	19	3649.25	637.316	275.776	189.049	238.568
E5	19	5907.51	959.976	262.501	297.221	247.307				E5	19	6415.91	1039.39	368.831	589.227	202.734
E6	19	3426.71	742.219	309.793	149.697	284.86				E6	19	4127.21	648.084	281.63	544.136	201.389
E7	19	3451.37	476.364	219.283	76.7027	172.412				E7	19	4154.09	666.095	268.214	337.06	212.2
E8	19	3074.37	455.974	99.4936	90.288	0				E8	19	3286.33	525.504	220.827	146.718	34.8262
E9	19	2681.29	434.939	201.814	165.079	41.812				E9	19	2970.75	578.859	160.088	225.108	124.391
E10	19	3248.59	707.865	300.088	311.761	210.601				E10	19	3116.71	685.859	240.255	450.092	190.392
E11	19	3737.47	870.195	305.507	296.552	254.218				E11	19	3740.78	602.359	285.003	329.388	142.241
E12	19	3146.86	435.688	280.355	237.626	198.823				E12	19	3111.8	592.003	146.945	0	7.3638
F1	19	4155.15	687.77	214.349	274.964	24.6794				F1	19	4200.95	501.007	241.353	230.018	72.692
F2	19	5710.32	706.973	377.214	569.717	59.0711				F2	19	6529.44	830.512	412.8	784.824	86.3347
F3	19	5565.76	1032.65	397.156	433.857	59.38				F3	19	6027.81	1206.76	470.619	664.487	315.902
F4	19	4865.56	957.847	206.409	207.698	53.7836				F4	19	6157.73	1063.03	250.81	262.638	154.083
F5	19	4229.44	769.122	316.168	650.015	548.132				F5	19	4719.58	733.447	248.175	280.806	222.41
F6	19	2725.69	416.148	146.787	194.478	0				F6	19	3043.1	490.896	239.209	362.353	64.1272
F7	19	3502.76	469.765	49.058	165.28	125.486				F7	19	3816.21	456.439	111.823	53.9514	88.8474
F8	19	3565.66	635.442	449.563	337.953	0				F8	19	4229.1	703.352	252.682	587.424	272.639
F9	19	3341.19	636.299	329.447	504.533	223.852				F9	19	3452.36	794.427	417.567	457.128	134.311
F10	19	4186.03	661.566	0	0	0				F10	19	5160.34	970.171	152.528	388.935	323.407
F11	19	4565.55	779.283	354.787	544.744	152.384				F11	19	5066.36	672.174	315.282	424.59	141.994
F12	19	4210.77	736.848	333.732	436.069	90.2239				F12	19	4250.58	615.295	327.114	281.591	145.178
G1	19	8867.63	1186.61	632.366	857.32	372.144				G1	19	9488.32	1390.91	670.327	1130.14	410.089
G2	19	7256.99	1025.2	672.62	721.485	103.471				G2	19	8859.85	1216.22	769.891	909.997	320.589
G3	19	5169.22	750.661	427.854	634.617	295.322				G3	19	5654.2	959.753	445.812	590.922	181.952
G4	19	4516.71	682.372	386.849	420.256	170.98				G4	19	5504.71	746.908	350.006	724.51	256.995
G5	19	4346.93	608.81	196.71	136.836	400.721				G5	19	4540.67	733.448	291.234	409.583	42.9344
G6	19	5915.27	1049.68	304.914	270.771	0				G6	19	6202.78	1006.18	343.795	264.03	0
G7	19	3272.87	550.42	287.149	526.032	40.6439				G7	19	3915.01	747.151	349.173	309.022	176.713
G8	19	4591.59	616.193	168.546	246.431	224.592				G8	19	5288.95	866.949	192.234	305.775	212.667
G9	19	5304.7	883.263	294.745	308.01	0				G9	19	5868.34	909.399	427.063	423.815	137.971
G10	19	5728.61	939.436	229.431	381.3	102.007				G10	19	6013.7	886.052	244.767	500.132	135.833
G11	19	8069.04	1313.18	459.904	582.782	144.497				G11	19	9205.89	1609.5	656.812	764.133	102.968
G12	19	8640.39	1685	404.846	679.184	309.351				G12	19	7935.12	1527.66	499.402	607.313	200.402
H1	19	7455.81	1241.88	372.982	757.272	220.55				H1	19	8299.01	1090.77	459.357	765.307	330.826
H2	19	8393.33	1257.61	355.641	546.989	64.5497				H2	19	8205.48	1261.97	406.318	477.999	219.744
H3	19	6111.29	741.724	318.809	257.558	223.651				H3	19	6739.06	905.326	295.966	637.16	0
H4	19	4200.04	633.265	343.657	352.09	172.7				H4	19	5522.1	1288.34	518.61	528.135	282.547
H5	19	7127.19	1234.85	196.978	341.261	16.8702				H5	19	7779.12	1373.99	277.164	386.98	179.949
H6	19	4376.8	650.837	311.276	484.507	99.7107				H6	19	4888.93	763.105	436.819	699.564	220.161
H7	19	3758	147.718	0	138.157	0				H7	19	4081.99	414.096	0	155.588	164.414
H8	19	3687.79	604.762	209.368	228.577	188.172				H8	19	4052.39	652.633	210.461	251.542	96.0159
H9	19	5789.66	838.713	184.982	253.287	194.132				H9	19	5801.16	951.475	114.791	41.8821	0
H10	19	22654.5	3044.8	479.011	657.201	277.094				H10	19	20775.1	2753.5	447.178	617.168	140.428
H11	19	16166.1	2103.95	284.348	369.337	124.834				H11	19	16039.5	2312.36	327.548	363.274	8.08642
H12	19	19689.5	3108.2	572.268	725.504	293.392				H12	19	17964	2930.84	537.114	656.408	52.5086
A1	20	6115.87	891.977	191.485	441.463	350.965				A1	20	7112.11	1165.73	636.558	318.197	636.936
A2	20	4097.29	691.097	318.218	149.671	176.554				A2	20	4849.31	704.728	281.054	436.364	280.578
A3	20	4857.22	858.994	337.711	479.599	175.856				A3	20	6185.83	940.925	537.967	687.618	420.616
A4	20	6707.41	967.861	25.6352	135.128	41.2867				A4	20	7751.48	964.981	242.111	373.418	0
A5	20	3065.8	375.607	93.5327	20.5787	0				A5	20	3932.11	571.871	93.5327	82.3147	0
A6	20	2647.16	169.499	0	0	215.699				A6	20	4097.37	489.921	0	244.548	171.361
A7	20	2837.08	548.093	123.705	129.558	0				A7	20	3364.2	570.283	48.5984	7.13166	0
A8	20	2875.75	448.698	117.869	94.6467	87.5136				A8	20	3546.79	520.572	122.906	262.908	258.165
A9	20	4313.66	792.578	232.5	233.122	0				A9	20	5495.91	999.584	342.409	382.488	297.798
A10	20	6379.38	1195.21	562.988	437.195	486.215				A10	20	6396.46	1225.49	430.223	613.663	0
A11	20	4773.97	884.288	197.493	478.775	208.878				A11	20	5016.2	1049.82	262.703	381.681	0
A12	20	4376.89	950.743	234.147	394.742	54.0795				A12	20	6115.6	1298.44	488.138	691.238	526.374
B1	20	4954.38	865.133	284.124	292.628	115.638				B1	20	5872.1	919.817	417.829	1024.67	423.4
B2	20	8535.87	1628.44	494.05	588.172	221.178				B2	20	9102.76	1573.85	426.585	664.522	311.986
B3	20	3313.37	331.303	307.821	273.016	133.805				B3	20	4507.29	641.195	389.173	354.153	159.737
B4	20	3622.11	467.423	136.912	281.098	45.2733				B4	20	4263.6	802.66	328.87	515.598	135.82
B5	20	5164.62	676.941	69.5864	1205.52	1293.08				B5	20	5299.77	759.723	403.317	1567.33	1571.21
B6	20	4146.45	892.285	65.7958	429.531	0				B6	20	4717.91	695.304	309.38	364.94	0
B7	20	3770.71	609.208	123.256	0	0				B7	20	4264.27	573.221	197.209	101.838	0
B8	20	3661.68	694.722	249.14	341.984	117.119				B8	20	4048.41	675.339	307.698	273.827	244.422
B9	20	4064.9	672.831	368.992	324.99	0				B9	20	4622.29	750.974	244.643	404.837	151.819
B10	20	3136.3	645.673	174.58	410.663	263.215				B10	20	3474.86	552.838	258.825	296.25	68.8578
B11	20	6394.7	1138.15	479.106	443.219	71.3632				B11	20	7242.58	1033.71	412.743	302.125	270.516
B12	20	5106.01	1147.42	467.948	295.516	238.154				B12	20	5751.97	969.965	266.025	471.07	315.553
C1	20	3784.41	549.596	260.671	217.798	87.2053				C1	20	4779.07	813.054	275.152	155.043	90.9427
C2	20	4281.44	722.547	230.813	332.67	0				C2	20	5343.02	733.495	328.065	298.459	256.577
C3	20	3844.91	465.556	239.899	263.308	117.036				C3	20	4632.95	694.344	432.09	405.194	478.014
C4	20	3690.76	524.778	135.36	182.208	0				C4	20	4255.77	606.651	165.789	372.699	0
C5	20	3134.81	542.578	57.5135	88.701	132.695				C5	20	3462.94	491.861	253.059	132.427	239.871
C6	20	2717.94	491.114	151.685	368.416	29.7547				C6	20	3263.94	441.738	168.321	125.975	329.781
C7	20	3045.24	437.065	74.5327	232.581	469.446				C7	20	3947.2	682.086	240.161	283.142	182.562
C8	20	2998.38	406.486	209.485	584.291	9.88956				C8	20	3829.44	641.087	443.24	283.926	400.527
C9	20	3419.47	566.817	274.776	338.504	429.336				C9	20	4002.06	751.305	176.734	405.918	418.08
C10	20	3465.41	500.935	350.031	390.329	431.783				C10	20	4094.63	605.077	363.239	340.183	341.515
C11	20	4142.02	736.644	437.91	474.675	166.439				C11	20	4351.3	996.549	550.555	575.114	147.291
C12	20	3988.74	642.85	307.366	238.155	351.369				C12	20	4495.19	850.717	353.551	523.941	119.584
D1	20	3598.45	665.253	194.621	59.7451	177.781				D1	20	3870.9	588.57	154.63	160.368	219.263
D2	20	3021.7	517.898	276.983	231.001	146.553				D2	20	3615.28	603.018	289.752	257.585	152.118
D3	20	2832.85	442.832	125.261	174.262	175.518				D3	20	3303.17	343.025	281.587	268.741	0
D4	20	2568.36	420.203	235.753	66.495	342.98				D4	20	3011.53	391.383	174.296	186.423	0
D5	20	4832.02	659.193	223.419	279.756	218.515				D5	20	5501.08	1029.32	288.81	484.997	0
D6	20	3482.54	560.315	155.93	96.9696	0				D6	20	4097.88	628.291	247.525	490.09	198.44
D7	20	2871.36	481.897	189.248	341.131	421.776				D7	20	3563.44	607.456	357.579	287.268	194.972
D8	20	2064.05	348.106	0	0	0				D8	20	2907.34	484.58	37.6543	166.535	0
D9	20	2576.13	478.203	80.797	160.59	0				D9	20	2889.36	564.247	194.446	0	0
D10	20	2581.25	352.657	267.243	0	173.737				D10	20	2613	426.319	171.404	187.321	0
D11	20	2347.92	500.017	147.893	143.259	141.995				D11	20	2795.51	473.912	123.86	89.5368	0
D12	20	5057.82	1109.81	361.091	448.884	332.457				D12	20	5133.13	674.98	342.668	304.638	0
E1	20	5492.25	759.667	294.709	464.051	164.741				E1	20	6495.28	1019.13	275.88	438.086	245.388
E2	20	3443.03	499.845	229.985	254.674	48.7686				E2	20	4220.87	672.502	370.735	427.958	438.047
E3	20	3697.75	512.871	343.116	267.119	450.453				E3	20	4628.25	768.13	334.476	507.79	507.987
E4	20	3196.65	708.254	233.068	269.465	260.116				E4	20	3623.82	592.276	266.014	158.011	24.6264
E5	20	5625.27	1013.25	305.698	95.1628	171.102				E5	20	6360.7	1061.5	296.837	302.435	84.832
E6	20	3584.68	553.949	324.88	367.114	56.972				E6	20	3998.75	680.669	357.066	451.467	333.882
E7	20	3606.5	649.809	190.287	227.948	141.065				E7	20	4037.56	626.194	337.986	155.566	397.874
E8	20	2903.68	533.555	115.671	334.818	0				E8	20	3535.81	585.52	212.738	268.356	39.0054
E9	20	2569.48	522.404	156.682	205.098	79.4428				E9	20	2983.1	484.238	208.626	365.175	65.8539
E10	20	3039.92	608.838	205.275	114.588	0				E10	20	3145.92	624.425	258.665	229.175	109.555
E11	20	3687.76	702.934	309.607	555.136	342.992				E11	20	3571.75	876.754	212.214	341.701	472.118
E12	20	3183.98	596.438	201.082	240.181	157.094				E12	20	3046.84	450.1	56.071	155.01	117.821
F1	20	4240.92	697.331	233.477	289.505	195.64				F1	20	4290.88	676.934	246.979	360.449	34.1024
F2	20	5562.03	805.597	421.951	642.619	200.842				F2	20	6638.89	907.334	389.415	646.219	504.376
F3	20	5718.72	856.374	448.809	552.597	242.27				F3	20	6550	1054.42	515.385	536.613	573.611
F4	20	4720.89	1022.75	224.409	383.237	8.72166				F4	20	6087.85	1068.63	248.41	170.179	202.052
F5	20	4315.28	654.751	317.302	412.109	134.881				F5	20	4585.74	697.771	334.3	282.107	421.861
F6	20	2634.58	479.396	219.016	122.925	0				F6	20	3143.87	602.3	271.828	429.319	217.046
F7	20	3544.18	453.773	137.074	236.358	0				F7	20	3790.46	553.057	119.759	106.19	12.8233
F8	20	3510.73	660.665	337.962	449.785	53.722				F8	20	4267.13	932.305	261.104	280.194	122.218
F9	20	3309.79	455.446	316.43	625.305	362.876				F9	20	3752.79	617.362	377.513	512.434	333.422
F10	20	4020.73	639.86	0	0	0				F10	20	5174.93	963.565	88.7437	426.243	341.225
F11	20	4627.36	835.79	354.787	467.344	141.994				F11	20	4744.73	750.608	309.204	384.785	141.994
F12	20	4132.26	706.728	328.059	368.982	118.931				F12	20	4248.37	672.306	214.609	266.585	120.572
G1	20	8521.99	1095.58	512.004	734.112	377.982				G1	20	9944.28	1187.67	621.256	901.323	461.167
G2	20	7554.88	1016.06	716.082	840.59	283.272				G2	20	8681.12	1319.86	752.3	1068.52	187.434
G3	20	5151.64	707.07	464.55	612.423	451.381				G3	20	5409.51	803.119	453.619	529.888	272.228
G4	20	4452.2	683.321	423.692	454.854	256.995				G4	20	5344.76	740.264	497.377	646.157	239.163
G5	20	4417.88	625.588	277.609	108.174	0				G5	20	4694.16	666.335	281.866	129.439	72.5114
G6	20	5899.66	1028.88	230.22	230.324	0				G6	20	6152.67	1144.25	317.192	191	0
G7	20	3345.29	590.193	199.09	248.259	303.062				G7	20	3983.81	669.027	342.282	344.611	114.863
G8	20	4544.89	649.57	214.099	223.296	96.3958				G8	20	5128.7	920.866	201.344	132.771	115.277
G9	20	5257.2	867.12	232.943	298.36	109.767				G9	20	6016.37	927.849	284.444	477.697	391.808
G10	20	5686.12	831.365	348.441	261.891	40.1687				G10	20	5895.83	845.688	284.642	459.752	213
G11	20	8122.5	1329.26	485.114	564.34	211.056				G11	20	8809.12	1571.22	613.206	856.345	337.918
G12	20	8361.67	1731.77	537.959	643.249	365.813				G12	20	8187.89	1493.64	376.387	579.463	312.532
H1	20	7578.06	979.491	506.471	560.422	204.389				H1	20	8227.1	1228.14	458.048	640.769	302.306
H2	20	8069.93	1277.69	405.413	455.472	35.7083				H2	20	8090.21	1165.91	338.447	568.108	72.7901
H3	20	5985.74	817.091	436.003	565.836	292.099				H3	20	6755.39	830.878	360.522	484.21	142.468
H4	20	4129.37	634.548	304.779	517.743	200.896				H4	20	5779.07	1251.13	600.532	522.633	103.973
H5	20	7056.5	1318.34	196.107	351.874	323.747				H5	20	7523.84	1468.62	284.137	444.945	293.22
H6	20	4367.48	746.618	247.645	475.302	183.468				H6	20	5140.72	753.684	385.226	409.195	140.393
H7	20	3764.61	168.907	0	80.0534	278.33				H7	20	4323.63	291.199	0	120.726	122.724
H8	20	3768.63	605.294	145.409	259.553	75.2688				H8	20	4351.2	684.546	259.66	359.422	180.934
H9	20	6175.8	915.361	209.11	334.392	410.183				H9	20	6022.17	919.047	50.4496	165.534	0.626233
H10	20	32832.3	4288.58	535.856	455.704	188.7				H10	20	29769	3815.62	417.619	481.058	218.791
H11	20	23223.5	3146.72	320.456	319.174	166.782				H11	20	23132.4	3238.03	323.035	393.041	84.402
H12	20	28041.3	4314.84	624.589	831.4	308.488				H12	20	25648	4066.73	497.055	543.752	260.574
A1	21	6055.68	1152.04	282.915	533.195	88.1023				A1	21	7211.43	1215.92	598.606	600.561	485.285
A2	21	4075.8	554.786	205.564	319.368	333.067				A2	21	4634.45	933.73	225.308	398.42	292.03
A3	21	5119.97	747.619	325.861	691.085	317.776				A3	21	6034.41	874.356	631.578	760.424	572.819
A4	21	6778.63	699.971	159.508	219.402	0				A4	21	7546.48	972.182	276.291	213.59	293.003
A5	21	3189	389.143	58.5988	16.9471	0				A5	21	3946.38	566.231	173.543	25.4207	0
A6	21	2767.12	261.214	0	0	11.9833				A6	21	3530.88	399.367	0	0	311.566
A7	21	3036.02	369.464	8.83608	78.4483	0				A7	21	3373.07	431.596	97.1969	112.918	44.7218
A8	21	3063.83	511.331	164.211	80.9755	219.878				A8	21	3190.37	491.823	222.642	173.519	117.049
A9	21	4732.27	655.047	284.636	478.807	0				A9	21	5095.28	1061.97	463.591	265.229	9.3549
A10	21	6274.99	1006.4	369.723	445.144	108.828				A10	21	6829.22	1138.21	564.668	777.412	207.124
A11	21	4580.72	457.391	327.913	363.267	208.878				A11	21	4882.84	1169.61	309.281	6.69616	0
A12	21	4687.54	717.132	250.022	452.638	55.8821				A12	21	6171.23	1135.46	434.562	487.726	405.596
B1	21	4635.53	939.447	401.116	547.618	268.608				B1	21	5821.92	650.602	459.055	824.25	490.779
B2	21	8547.13	1566.88	497.164	558.01	293.105				B2	21	9406.85	1692.32	491.974	573.091	258.94
B3	21	3402.44	334.683	227.568	202.843	0				B3	21	4238.9	613.023	225.369	242.315	0
B4	21	3662.57	532.835	124.208	196.919	302.309				B4	21	4490.44	696.365	224.422	493.05	148.964
B5	21	5025.33	542.087	335.151	1173.5	1301.21				B5	21	5781.06	722.338	403.317	1312.78	1393.92
B6	21	3783.63	786.62	137.191	350.407	8.2075				B6	21	4529.2	699.217	324.779	324.571	292.187
B7	21	3721.62	363.726	143.799	242.845	176.139				B7	21	4508.4	636.199	201.318	78.337	124.627
B8	21	3507.19	615.15	262.981	510.585	239.33				B8	21	4054.55	805.918	259.787	314.482	482.478
B9	21	4146.5	509.921	302.763	354.407	164.471				B9	21	4768.89	724.485	321.686	110.665	412.758
B10	21	3082.56	529.89	272.02	316.681	239.892				B10	21	3473.79	765.628	294.35	266.625	0
B11	21	6687.73	918.661	451.589	412.546	76.3421				B11	21	7011.97	950.522	341.525	369.605	79.6613
B12	21	5140.01	1010.3	301.281	386.219	7.4423				B12	21	5594.73	1006.26	301.281	545.68	165.219
C1	21	3829.53	511.212	414.177	289.168	181.885				C1	21	4985.06	722.327	228.811	116.897	0
C2	21	4190.78	639.071	127.077	222.96	321.932				C2	21	5040.34	684.23	361.779	447.099	177.91
C3	21	3832.66	422.991	287.606	293.322	250.992				C3	21	4408.38	685.032	173.109	413.38	148.057
C4	21	3853.65	551.411	102.831	75.7229	45.0938				C4	21	4138.49	538.588	245.536	395.179	243.269
C5	21	3311.22	415.307	119.21	306.081	0				C5	21	3537.03	496.646	145.352	301.084	0
C6	21	2949.4	444.383	92.9681	155.686	0				C6	21	3322.01	538.726	173.214	41.5954	75.6266
C7	21	2983.06	420.509	117.78	313.479	252.505				C7	21	3976.41	654.769	219.918	626.958	171.893
C8	21	2661.58	380.936	167.333	83.6836	74.1717				C8	21	3840.37	526.11	347.439	446.811	275.259
C9	21	3608.99	586.236	259.296	425.999	0				C9	21	3709.59	644.496	273.486	137.697	271.752
C10	21	3550.54	594.531	278.704	489.267	198.59				C10	21	4082.66	739.538	615.525	482.49	347.533
C11	21	4391.95	714.367	528.026	550.348	229.774				C11	21	4501.86	827.24	518.17	465.044	92.7933
C12	21	3829.78	664.021	293.033	462.914	346.94				C12	21	4495.19	690.967	321.699	459.937	32.4795
D1	21	3486.52	440.182	250.607	249.2	0				D1	21	4169.36	692.142	92.4226	318.379	55.5565
D2	21	2971.03	535.332	261.268	183.334	255.076				D2	21	3567.71	470.723	255.375	219.085	105.74
D3	21	2420.87	384.692	344.719	205.755	172.288				D3	21	3117.23	381.785	210.439	347.474	62.4544
D4	21	2662.32	245.428	193.438	274.292	0				D4	21	2958.32	414.625	223.663	186.423	0
D5	21	4717.72	902.362	184.185	217.007	414.178				D5	21	5624.17	876.971	371.639	384.337	324.201
D6	21	3778.82	591.39	228.988	298.771	407.02				D6	21	4235.5	636.06	242.073	587.059	201.337
D7	21	2874.53	452.718	252.995	63.4383	218.846				D7	21	3689.49	604.803	186.26	414.145	0
D8	21	2371.03	429.199	94.1358	0	314.115				D8	21	2796.69	547.872	0	0	283.146
D9	21	2783.97	494.75	140.285	39.626	0				D9	21	2923.76	321.008	127.855	0	40.0748
D10	21	2637.88	546.02	314.241	105.745	45.2769				D10	21	2485.14	352.657	165.875	134.951	0
D11	21	2583.29	577.329	84.114	0	152.408				D11	21	2673	548.211	225.537	47.1247	109.809
D12	21	4699.76	1104.12	357.406	438.119	80.7545				D12	21	4812.07	592.561	313.191	430.584	591.501
E1	21	5654.45	711.895	280.792	394.144	110.976				E1	21	6362.89	903.919	387.215	448.073	108.908
E2	21	3562.62	520.831	251.143	417.456	292.612				E2	21	4436.94	652.47	312.779	420.082	166.336
E3	21	3756.18	416.414	309.792	316.046	78.5837				E3	21	4427.6	741.075	285.107	308.112	0
E4	21	2941.37	414.368	215.984	249.713	180.081				E4	21	3669.59	475.172	295.301	138.259	0
E5	21	5625.27	933.84	228.166	136.878	0				E5	21	6429.26	1175.09	237.026	165.557	248.745
E6	21	3832.01	648.989	268.554	278.008	21.1989				E6	21	4080.13	804.674	372.153	414.636	702.213
E7	21	3595.06	684.01	229.251	10.8032	86.809				E7	21	4037.56	661.209	319.864	204.18	0
E8	21	2924.31	503.547	131.04	47.652	0				E8	21	3342.61	718.726	206.267	96.558	4.17915
E9	21	2596.23	436.53	229.063	283.136	0				E9	21	2884.32	569.317	216.29	275.132	436.935
E10	21	3176.8	624.425	221.844	253.951	180.819				E10	21	3286.98	607.921	336.909	391.249	0
E11	21	3754.04	728.078	202.988	246.271	151.32				E11	21	3942.96	606.732	274.751	349.91	375.274
E12	21	2984.98	538.789	201.082	179.71	79.3654				E12	21	3053.03	522.16	126.643	89.4291	0
F1	21	4380.81	587.696	190.72	251.169	158.397				F1	21	4259.24	559.012	284.11	324.757	162.884
F2	21	5485.53	666.486	470.755	529.216	302.626				F2	21	6516.5	905.258	451.437	625.519	188.119
F3	21	5769.36	816.113	423.557	569.723	89.07				F3	21	6458.22	971.718	441.922	794.644	22.5644
F4	21	4974.8	849.306	296.412	138.019	122.103				F4	21	6308.3	1257.73	362.415	389.937	283.454
F5	21	4163.9	808.995	276.506	273.006	225.279				F5	21	4614.35	694.623	285.571	505.712	297.024
F6	21	2714.23	401.054	166.98	160.536	0				F6	21	3129.99	529.708	162.32	274.287	133.187
F7	21	3389.13	471.764	55.551	0	122.738				F7	21	3745.68	575.713	168.096	59.946	119.99
F8	21	3476.92	636.412	397.974	417.833	185.341				F8	21	4251.07	847.902	237.942	400.628	143.706
F9	21	3197.76	669.44	319.434	321.682	295.721				F9	21	3636.52	713.943	317.431	461.642	267.445
F10	21	4066.43	706.866	0	0	163.931				F10	21	5251.74	820.115	121.098	376.81	214.714
F11	21	4595.11	788.56	314.522	336.871	74.114				F11	21	4669.47	863.621	265.901	345.717	38.096
[truncated: 10,009 more rows]

## Sheet: Figure 5B-HCT116 QPCR Raw data
Sample Name	样本	Cq -SIRT2	Mean	Cq -SGADPH
Sample 1	HCT116-DMSO-1-1	22.1	22.09	12.98		GAPDH		SIRT2
Sample 2	HCT116-DMSO-1-2	22.08		12.99	DMSO	12.98	12.985	22.1	9.115
Sample 3	HCT116-Dub1/2-1-1	22.65	22.65	13.79		12.99		22.08	9.095
Sample 4	HCT116-Dub1/2-1-2	22.65		13.81		12.97	13.425	21.97	8.545
Sample 5	HCT116-Dub1-1	22.16		13.73		13.88		22.01	8.585
Sample 6	HCT116-Dub1-2	22.2		13.61		12.88	12.865	21.94	9.075
Sample 7	HCT116-DMSO-2-1	21.97		12.97		12.85		22.14	9.275
Sample 8	HCT116-DMSO-2-2	22.01		13.88		13.37	13.41	22.17	8.76
Sample 13	HCT116-Dub1/2-2-1	22.15		13.28		13.45		22.28	8.87
Sample 14	HCT116-Dub1/2-2-2	22.11		13.24	22.92μM	13.79	13.8	22.65	8.85
Sample 15	HCT116-Dub2-1	22.19		13.6		13.81		22.65	8.85
Sample 16	HCT116-Dub2-2	22.13		13.52		13.28	13.26	22.15	8.89
Sample 17	HCT116-DMSO-3-1	21.94		12.88		13.24		22.11	8.85
Sample 18	HCT116-DMSO-3-2	22.14		12.85		13.97	13.89	22.77	8.88
Sample 19	HCT116-Dub1/2-3-1	22.77		13.97		13.81		22.82	8.93
Sample 20	HCT116-Dub1/2-3-2	22.82		13.81		13.39	13.39	22.2	8.81
Sample 25	HCT116-DMSO-4-1	22.17		13.37		13.39		21.87	8.48
Sample 26	HCT116-DMSO-4-2	22.28		13.45	45.84μM	13.73	13.67	22.16	8.49
Sample 27	HCT116-Dub1/2-4-1	22.2		13.39		13.61		22.2	8.53
Sample 28	HCT116-Dub1/2-4-2	21.87		13.39		13.6	13.56	22.19	8.63
Sample 29	HCT116-Dub3-1	22.02		13.7		13.52		22.13	8.57
Sample 30	HCT116-Dub3-2	22.05		13.52		13.7	13.61	22.02	8.41
Sample 31	HCT116-Dub4-1	22.31		13.65		13.52		22.05	8.44
Sample 32	HCT116-Dub4-2	22.4		13.93		13.65	13.79	22.31	8.52
Sample 37						13.93		22.4	8.61
Sample 38
Sample 39
Sample 40
Sample 41
Sample 42
Sample 43
Sample 44
Sample 49
Sample 50
Sample 51
Sample 52
Sample 53
Sample 54
Sample 55
Sample 56
Sample 61
Sample 62
Sample 63
Sample 64
Sample 65
Sample 66
Sample 67
Sample 68

## Sheet: Figure 5C-LoVo QPCR Raw data
	GAPDH		SIRT2
DMSO	12.85	12.88	21.03	8.15						1				2
	12.91		21	8.12		DMSO	14.05μM	28.11μM		DMSO	14.05μM	28.11μM		DMSO	14.05μM	28.11μM
	13.03	13.05	21.02	7.97		8.15	8.2	7.955		0	0.05	-0.195		1	0.965936	1.14472
	13.07		21.44	8.39		8.12	8.25	7.915		-0.03	0.13	-0.235		1.02101	0.913831	1.17691
	13.13	13.125	21.23	8.105		7.97	8.165	7.955		-0.18	0.015	-0.195		1.13288	0.989657	1.14472
	13.12		21.22	8.095		8.39	8.135	8.035		0.24	-0.015	-0.115		0.846745	1.01045	1.08298
	13.02	12.975	20.99	8.015		8.105	7.875	7.96		-0.045	-0.275	-0.19		1.03168	1.20999	1.14076
	12.93		20.94	7.965		8.095	7.905	7.96		-0.055	-0.245	-0.19		1.03886	1.18509	1.14076
0.5DUb	13.44	13.44	21.64	8.2		8.015	7.815	7.945		-0.135	-0.335	-0.205		1.09809	1.26138	1.15269
	13.44		21.69	8.25		7.965	7.875	7.915		-0.185	-0.275	-0.235		1.13682	1.20999	1.17691
	13.03	13.005	21.17	8.165
	12.98		21.14	8.135
	13.08	13.115	20.99	7.875
	13.15		21.02	7.905
	13.41	13.385	21.2	7.815
	13.36		21.26	7.875
DUB	13.4	13.475	21.43	7.955
	13.55		21.39	7.915
	13.23	13.155	21.11	7.955
	13.08		21.19	8.035
	13.42	13.46	21.42	7.96
	13.5		21.42	7.96
	13.25	13.235	21.18	7.945
	13.22		21.15	7.915

## Sheet: Figure 5D-HCT116 DUb SIRT2-Raw 
Tublin-1	43914
	55016.3
	54350.6
HCT116-1	11036.9	0.251331
	27945.2	0.507944
	35864.8	0.659878
Tublin-2	40358.3
	54005.2
	54345.5
HCT116-2	10244.1	0.253829
	26235.4	0.485794
	35338.1	0.65025
Tublin-3	41739.1
	54311
	54312.1
HCT116-3	10895.5	0.261038
	27519.1	0.506694
	35564.2	0.654812
DMSO	0.251331	0.253829	0.261038
22.92μM	0.507944	0.485794	0.506694
45.84μM	0.659878	0.65025	0.654812
DMSO-average	0.255399	0.255399	0.255399
Normalization	0.984072	0.993851	1.02208
	1.98883	1.9021	1.98393
	2.58371	2.54601	2.56388

## Sheet: Figure 5E LoVo WB-Raw data
1	18954.1
2	19116.9
3	17869.7
4	16815.5
5	13996.5
6	19583.6
7	17104.8
8	16040.7
9	16627.6
10	3484.55	18954.1	0.183841
11	10639.9	19116.9	0.556569
12	21514	17869.7	1.20393
13	5147.33	18954.1	0.271568
14	9788.52	19116.9	0.512036
15	24371.3	17869.7	1.36383
16	7286.3	18954.1	0.384418
17	14778.2	19116.9	0.773047
18	22781.7	17869.7	1.27488
DMSO	0.183841	0.271568	0.384418
14.05μM	0.556569	0.512036	0.773047
28.11μM	1.20393	1.36383	1.27488
DMSO-average	0.279942	0.279942	0.279942
Normalization	0.656711	1.98816	4.30065
	0.970085	1.82908	4.87183
	1.3732	2.76145	4.55408

## Sheet: Figure 5F-WB-Raw data
pdx	1	20049			ct26	1	23656.2
	2	20286				2	24108.7
	3	20160.3				3	24118.3
	4	21368.2				4	26369
	5	22517.6				5	27288.7
	6	19679.2				6	23105.2
	7	15966.2	0.796361			7	11068.2	0.55206	1.44253	0.796361
	8	19902.8	0.98111			8	14509.1	0.715229	1.37174	0.98111
	9	20584.6	1.02105			9	15405.6	0.764155	1.33618	1.02105
	10	29150.5	1.3642			10	22986.4	1.07573	1.44253	1.55176
	11	27890.6	1.23861			11	23594.5	1.04782	1.37174	1.43735
	12	25343.4	1.28783			12	23601.3	1.19931	1.33618	1.60248
GAPDH			pdx			CT26
0.796361	0.98111	1.02105	1.3642	1.23861	1.28783	1.55176	1.43735	1.60248
0.932839	0.932839	0.932839	0.932839	0.932839	0.932839	0.932839	0.932839	0.932839
0.853696	1.05175	1.09456	1.46242	1.32779	1.38055	1.66348	1.54083	1.71786

## Sheet: Figure 5G-PDX SIRT2 IHC Raw dat
		Area	Mean	IntDen	DawIntDen	MinThr	MaxThr	IOD				Area	Mean	IntDen	DawIntDen	MinThr	MaxThr	IOD
pdx-dmso-3#-1	1	728932	0.334	243586	92156317	2.106	0.192	0.334168		pdx-dub-1#-1	1	482708	0.444	214204	47133480	1.929	0.296	0.443755
pdx-dmso-3#-2	1	392673	0.343	134715	47631356	1.929	0.222	0.343071		pdx-dub-1#-2	1	901682	0.485	437189	82985296	2.106	0.214	0.484859
pdx-dmso-3#-3	1	396086	0.337	133559	48780074	2.106	0.222	0.337198		pdx-dub-1#-3	1	592156	0.477	282196	54800552	1.929	0.306	0.476556
pdx-dmso-3#-4	1	337146	0.336	113121	41521129	1.929	0.225	0.335526		pdx-dub-1#-4	1	695518	0.476	331349	65337080	2.106	0.279	0.476407
pdx-dmso-3#-5	1	542273	0.351	190138	65167774	1.929	0.222	0.350632		pdx-dub-1#-5	1	579477	0.466	270118	55140504	1.929	0.286	0.46614
pdx-dmso-3#-6	1	441839	0.343	151677	54026585	2.106	0.213	0.343286		pdx-dub-1#-6	1	326537	0.452	147443	31590100	2.106	0.306	0.451534
pdx-dmso-3#-7	1	706319	0.354	249726	84119681	2.106	0.216	0.35356		pdx-dub-1#-7	1	907534	0.46	417726	86975954	2.106	0.279	0.460287
pdx-dmso-3#-8	1	810805	0.35	283515	97576279	2.106	0.225	0.349671		pdx-dub-1#-8	1	827243	0.47	389039	78163987	2.106	0.286	0.470283
pdx-dmso-3#-9	1	811878	0.335	272038	100568287	1.929	0.222	0.335073		pdx-dub-1#-9	1	537944	0.478	257011	50482469	2.106	0.289	0.477766
pdx-dmso-3#-10	1	807258	0.351	283356	97552156	1.929	0.213	0.35101		pdx-dub-1#-10	1	718894	0.469	336849	69236631	2.106	0.264	0.468566
pdx-dmso-3#-11	1	661762	0.333	220244	82568338	2.106	0.208	0.332814		pdx-dub-1#-11	1	791370	0.461	364637	76666503	1.929	0.276	0.460767
pdx-dmso-3#-12	1	899344	0.344	309823	110125490	2.106	0.213	0.344499		pdx-dub-7#-1	1	81940	0.458	37529.1	7529431	1.929	0.35	0.458008
pdx-dmso-3#-13	1	919559	0.334	306756	115079972	2.106	0.197	0.33359		pdx-dub-7#-2	1	108908	0.419	45681.9	10847675	1.407	0.313	0.419454
pdx-dmso-3#-14	1	1049647	0.343	359744	130802927	1.929	0.184	0.342728		pdx-dub-7#-3	1	150318	0.443	66623.3	14265366	2.106	0.335	0.443216
pdx-dmso-3#-15	1	894801	0.34	304648	110394182	2.106	0.208	0.340464		pdx-dub-7#-4	1	236208	0.456	107633	22007743	2.106	0.327	0.45567
pdx-dmso-3#-16	1	528648	0.343	181576	63461331	2.106	0.239	0.343473		pdx-dub-7#-5	1	256958	0.477	122640	22647849	2.106	0.35	0.477278
pdx-dmso-7#-1	1	900935	0.349	314550	112239829	2.106	0.189	0.349137		pdx-dub-7#-6	1	181121	0.471	85374.6	16132002	2.106	0.357	0.471368
pdx-dmso-7#-2	1	545122	0.339	184887	67473495	2.106	0.211	0.339166		pdx-dub-7#-7	1	94727	0.467	44233.2	8483149	2.106	0.369	0.466955
pdx-dmso-7#-3	1	246385	0.334	82207.9	30300346	2.106	0.23	0.333656		pdx-dub-7#-8	1	213969	0.48	102675	19211650	1.929	0.335	0.479859
pdx-dmso-7#-4	1	272587	0.335	91391.7	33371584	2.106	0.228	0.335275		pdx-dub-7#-9	4	174958	0.474	82945.3	15383127	2.106	0.373	0.474087
pdx-dmso-7#-5	1	495955	0.323	160401	62590236	2.106	0.205	0.323419		pdx-dub-7#-10	2	238835	0.472	112734	21638983	2.106	0.335	0.472018
pdx-dmso-7#-6	1	260157	0.33	85851.3	32208113	2.106	0.225	0.329998		pdx-dub-7#-11	1	295783	0.467	138215	27046371	2.106	0.324	0.467286
pdx-dmso-7#-7	1	604728	0.326	197166	76366657	2.106	0.208	0.326041		pdx-dub-7#-12	5	303692	0.461	140058	27798812	1.929	0.335	0.461185
pdx-dmso-7#-8	1	361582	0.327	118408	44616687	1.929	0.23	0.327472		pdx-dub-7#-13	1	189585	0.461	87402.4	17311906	1.708	0.346	0.46102
pdx-dmso-7#-9	1	542794	0.343	186084	66773817	1.929	0.232	0.342827		pdx-dub-7#-14	3	142084	0.458	65127.6	12975570	2.106	0.357	0.458374
										pdx-dub-7#-15	1	212335	0.483	102581	18582770	2.106	0.35	0.483109
										pdx-dub-7#-16	2	421157	0.462	194756	39180676	2.106	0.317	0.462431
										pdx-dub-7#-17	2	166908	0.458	76375.6	15433055	2.106	0.338	0.457591

## Sheet: Figure 5G-CT26 SIRT2 IHC Raw da
		Area	Mean	IntDen	DawIntDen	MinThr	MaxThr	IOD				Area	Mean	IntDen	DawIntDen	MinThr	MaxThr	IOD
CT26-dmso-4#-1	1	837129	0.374	312870	93930659	1.929	0.248	0.373742		ct26-dub-2#-1	1	598768	0.548	328140	46929943	2.106	0.357	0.548025
CT26-dmso-4#-2	1	679083	0.384	260478	73878120	1.929	0.273	0.383573		ct26-dub-2#-2	1	292904	0.556	162772	22902264	2.106	0.357	0.555719
CT26-dmso-4#-3	1	711574	0.377	268505	78014952	2.106	0.283	0.37734		ct26-dub-2#-3	1	159388	0.557	88763.3	12014972	2.106	0.398	0.556901
CT26-dmso-4#-4	1	611553	0.381	233202	67811349	2.106	0.26	0.381327		ct26-dub-2#-4	1	327918	0.533	174788	25875927	2.106	0.385	0.533023
CT26-dmso-4#-5	1	623261	0.385	239977	67821819	1.452	0.279	0.385035		ct26-dub-2#-5	1	320567	0.554	177487	24574295	2.106	0.373	0.553666
CT26-dmso-4#-6	1	545638	0.382	208249	59783307	1.708	0.27	0.381662		ct26-dub-2#-6	1	221971	0.546	121282	17352726	2.106	0.373	0.546388
CT26-dmso-4#-7	1	1234738	0.384	474232	142363531	2.106	0.192	0.384075		ct26-dub-2#-7	1	293094	0.553	162032	22761914	2.106	0.369	0.552834
CT26-dmso-4#-8	1	1463100	0.374	547019	166328802	2.106	0.228	0.373877		ct26-dub-2#-8	1	297796	0.558	166293	22516262	2.106	0.385	0.558413
CT26-dmso-4#-9	1	1592654	0.388	618206	176972034	2.106	0.222	0.388161		ct26-dub-2#-9	1	240384	0.563	135367	17720976	2.106	0.411	0.563128
CT26-dmso-4#-10	1	1651092	0.383	632499	186124795	2.106	0.213	0.383079		ct26-dub-2#-10	1	479122	0.551	264198	36826507	1.452	0.373	0.551421
CT26-dmso-4#-11	1	1519238	0.38	577343	171305044	2.106	0.216	0.380021		ct26-dub-2#-11	1	357856	0.567	203011	26564755	1.929	0.385	0.567298
CT26-dmso-4#-12	1	1409356	0.377	530628	160195914	1.929	0.222	0.376504		ct26-dub-2#-12	1	422781	0.551	232793	32573099	2.106	0.377	0.550623
CT26-dmso-4#-13	1	1329429	0.384	510077	147387580	2.106	0.248	0.383681		ct26-dub-2#-13	1	237395	0.561	133189	17647105	1.929	0.407	0.561043
CT26-dmso-4#-14	3	2250311	0.379	852375	258169365	2.106	0.192	0.378781		ct26-dub-2#-14	1	288575	0.556	160590	21774198	2.106	0.394	0.556494
CT26-dmso-4#-15	1	1569845	0.39	612904	173510387	2.106	0.23	0.390423		ct26-dub-2#-15	1	375932	0.551	207062	28732691	1.708	0.394	0.550796
										ct26-dub-2#-16	1	224903	0.555	124904	16821439	1.929	0.407	0.555367
CT26-dmso-5#-1	1	837876	0.374	313252	95806133	2.106	0.225	0.373864		ct26-dub-2#-17	1	186085	0.54	100402	14552141	2.106	0.394	0.53955
CT26-dmso-5#-2	1	860685	0.379	326373	96928644	2.106	0.23	0.379201		ct26-dub-2#-18	1	271312	0.552	149669	20679681	2.106	0.385	0.551648
CT26-dmso-5#-3	1	1141045	0.395	451023	125252785	1.929	0.23	0.395272		ct26-dub-2#-19	1	369286	0.548	202406	29057108	1.929	0.361	0.5481
CT26-dmso-5#-4	1	1340322	0.373	500219	155343476	2.106	0.208	0.373208		ct26-dub-2#-20	1	399670	0.542	216690	31256894	1.929	0.381	0.542172
CT26-dmso-5#-5	1	917625	0.386	354130	103240096	1.929	0.222	0.38592		ct26-dub-2#-21	1	369076	0.567	209254	27127975	1.708	0.398	0.566968
CT26-dmso-5#-6	1	1535747	0.379	582146	177396100	2.106	0.208	0.379064		ct26-dub-2#-22	1	384117	0.549	210973	29880587	1.628	0.369	0.549241
CT26-dmso-5#-7	1	908875	0.384	348855	99963444	1.929	0.257	0.383832
CT26-dmso-5#-8	1	884666	0.377	333332	101719673	1.929	0.213	0.376789		ct26-dub-3#-1	1	1106025	0.564	623979	89289457	2.106	0.299	0.564163
CT26-dmso-5#-9	1	1130058	0.381	431044	126503699	2.106	0.233	0.381435		ct26-dub-3#-2	1	933615	0.556	519483	75089773	2.106	0.317	0.556421
CT26-dmso-5#-10	1	598881	0.385	230417	65332892	2.106	0.267	0.384746		ct26-dub-3#-3	1	949343	0.549	521198	77772722	2.106	0.31	0.549009
CT26-dmso-5#-11	1	1321606	0.384	507652	146722616	2.106	0.239	0.384117		ct26-dub-3#-4	1	668333	0.552	368959	53626402	2.106	0.327	0.552059
CT26-dmso-5#-12	1	850545	0.393	334398	94913123	2.106	0.225	0.393157		ct26-dub-3#-5	1	664315	0.566	376304	52038684	2.106	0.335	0.566454
CT26-dmso-5#-13	1	1514607	0.381	577733	176587009	1.23	0.181	0.381441		ct26-dub-3#-6	1	1338289	0.552	738516	108231489	2.106	0.324	0.551836
CT26-dmso-5#-14	1	1228606	0.386	473682	138685345	2.106	0.222	0.385544		ct26-dub-3#-7	1	640912	0.566	362463	49511122	2.106	0.35	0.565542
CT26-dmso-5#-15	1	1081849	0.376	406807	122036753	2.106	0.239	0.37603		ct26-dub-3#-8	1	801846	0.546	437954	65177458	1.503	0.317	0.546183
CT26-dmso-5#-16	1	776602	0.372	289266	88768346	1.708	0.225	0.372476		ct26-dub-3#-9	1	1178742	0.544	641557	96598247	2.106	0.317	0.544273
								#DIV/0!
CT26-dmso-7#-1	1	1839196	0.376	691070	213431057	2.106	0.189	0.375746		ct26-dub-6#-1	1	263253	0.568	149455	19585499	1.929	0.394	0.567725
CT26-dmso-7#-2	1	1198841	0.396	475263	131688959	2.106	0.222	0.396435		ct26-dub-6#-2	1	231429	0.546	126322	18079795	2.106	0.381	0.545836
CT26-dmso-7#-3	1	1251874	0.389	486827	139874229	2.106	0.216	0.388878		ct26-dub-6#-3	1	40846	0.546	22283.7	3069218	2.106	0.438	0.545553
CT26-dmso-7#-4	1	1047496	0.389	406952	116573274	2.106	0.216	0.3885		ct26-dub-6#-4	1	316232	0.561	177400	23981487	1.929	0.381	0.560981
CT26-dmso-7#-5	1	2396872	0.379	908273	290120074	2.106	0.146	0.378941		ct26-dub-6#-5	1	372904	0.535	199609	30426327	2.106	0.346	0.535283
CT26-dmso-7#-6	1	946188	0.386	364994	106225420	2.106	0.213	0.385752		ct26-dub-6#-6	1	301252	0.541	162914	23691681	2.106	0.373	0.540789
CT26-dmso-7#-7	1	932387	0.385	359318	104296440	1.929	0.23	0.385374		ct26-dub-6#-7	1	462508	0.55	254484	36280024	2.106	0.353	0.550227
CT26-dmso-7#-8	1	943928	0.385	363708	105441834	2.106	0.225	0.385313		ct26-dub-6#-8	1	127250	0.549	69879.1	9648892	2.106	0.411	0.549148
CT26-dmso-7#-9	1	1337952	0.389	520868	152754890	2.106	0.184	0.389302		ct26-dub-6#-9	1	124475	0.547	68144.8	9470286	2.106	0.407	0.547458
CT26-dmso-7#-10	1	1305941	0.38	495953	151015543	2.106	0.184	0.379767		ct26-dub-6#-10	1	581535	0.546	317717	46601882	2.106	0.335	0.546343
CT26-dmso-7#-11	1	592234	0.383	226816	65441038	2.106	0.248	0.382984		ct26-dub-6#-11	1	310940	0.546	169800	24393405	1.929	0.35	0.546085
CT26-dmso-7#-12	1	639788	0.373	238380	72368258	2.106	0.239	0.372593		ct26-dub-6#-12	1	416229	0.548	227973	32521168	2.106	0.346	0.547711
CT26-dmso-7#-13	1	2011608	0.379	762085	239865744	1.929	0.154	0.378844		ct26-dub-6#-13	1	528527	0.563	297731	41025654	1.929	0.335	0.563323
CT26-dmso-7#-14	1	1287397	0.382	491334	148028437	1.929	0.192	0.381649		ct26-dub-6#-14	1	675310	0.556	375290	53944817	2.106	0.306	0.555731
CT26-dmso-7#-15	1	1599483	0.38	607071	188614154	2.106	0.171	0.379542		ct26-dub-6#-15	1	151719	0.559	84793.8	11453478	2.106	0.398	0.558887
CT26-dmso-7#-16	1	1926185	0.412	792704	211157555	1.929	0.189	0.411541		ct26-dub-6#-16	1	230854	0.532	122830	18451119	1.929	0.369	0.532067
CT26-dmso-7#-17	1	1913839	0.381	729134	222038279	2.106	0.184	0.38098		ct26-dub-6#-17	1	200918	0.551	110644	15280923	2.106	0.394	0.550694
CT26-dmso-7#-18	1	1152194	0.378	435641	133649210	2.106	0.184	0.378097		ct26-dub-6#-18	1	170219	0.577	98250.9	12190584	2.106	0.42	0.577203
CT26-dmso-7#-19	1	1004446	0.391	392562	112934220	1.708	0.208	0.390825		ct26-dub-6#-19	1	140570	0.572	80413.7	10140519	1.929	0.424	0.572054
CT26-dmso-7#-20	1	2022473	0.375	757613	227909597	2.106	0.239	0.374597		ct26-dub-6#-20	1	245631	0.528	129759	19719027	2.106	0.377	0.528268
CT26-dmso-7#-21	1	1560140	0.379	591844	175948217	1.929	0.216	0.379353		ct26-dub-6#-21	1	315498	0.555	175200	24515905	2.106	0.357	0.555311
										ct26-dub-6#-22	1	921823	0.563	518703	75114275	2.106	0.276	0.562693
										ct26-dub-6#-23	1	284823	0.551	156884	22168760	2.106	0.361	0.550811
										ct26-dub-6#-24	1	339131	0.562	190524	25587667	1.708	0.369	0.561801
										ct26-dub-6#-25	1	659003	0.56	369031	51118199	1.365	0.335	0.559984
										ct26-dub-6#-26	1	327206	0.537	175755	26420531	1.503	0.338	0.53714
										ct26-dub-6#-27	1	316860	0.546	173119	25204716	1.708	0.338	0.546357
										ct26-dub-6#-28	1	475145	0.593	281593	34970817	2.106	0.353	0.592647
										ct26-dub-6#-29	1	717354	0.549	393710	56949947	2.106	0.327	0.548836
