# Supplementary material for: Decylubiquinone Inhibits Colorectal Cancer Growth Through Upregulating Sirtuin2
Source: Front Pharmacol. 2022 Feb 1;12:804265. doi: 10.3389/fphar.2021.804265 (PMC8844026; doi:10.3389/fphar.2021.804265)
Supplement: Supplementary file 6 [file Table1.XLSX]

## Sheet: Figure 1A-tumor volume - raw da
2 days after treatment	2 days
DUb group	Long diameter	Short diameter	Volume		DMSO group	Long diameter	Short diameter	Volume
	5.02	4.34	49.1685			3.42	3.08	16.8706
	4.3	3.72	30.9427			8.94	5.02	117.152
	3.8	3.3	21.5186			6.34	3.32	36.3386
	4.92	3.74	35.7859			4.52	4.44	46.3348
	4.76	4.08	41.2032			3.5	3.5	22.295
	5.1	3.82	38.699			7	3.82	53.1163
						5.72	3.84	43.8593
4 days after treatment
DUb group	Long diameter	Short diameter	Volume			Long diameter	Short diameter	Volume
	2.02	2	4.2016		DMSO group	3	2	6.24
	8.12	5.12	110.688			6.71	6.08	128.983
	5.52	4.54	59.1635			6.74	3.9	53.308
	3.02	3	14.1336			5.02	4.22	46.487
	8.14	5.7	137.524			6.68	4.14	59.5361
	5.4	4.32	52.404			6.9	4.92	86.8526
	5.5	5.02	72.0731			11.62	5.68	194.942
	5.98	5.22	84.7316			9.07	5.42	138.551
	4.6	4.22	42.5977			6.38	5.82	112.375
6 days after treatment	DUb group
	Long diameter	Short diameter	Volume		DMSO group	Long diameter	Short diameter	Volume
	5.04	4.08	43.6269			3.82	3.79	28.5328
	8.04	6.64	184.33			8.04	6.82	194.459
	7.06	5.08	94.7405			7.08	6.78	169.237
	10.38	8.04	348.91			7.58	6.36	159.436
	6.12	4.58	66.7553			10.38	8.04	348.91
	6.1	5.22	86.4319			7.12	6.28	146.017
	6.78	5.82	119.421			8.06	6.12	156.979
						6.78	6.28	139.044
						9.64	5.74	165.16
8 days after treatment	DUb group				DMSO group
	Long diameter	Short diameter	Volume			Long diameter	Short diameter	Volume
	6.8	6.68	157.785			18.56	7.58	554.523
	9.12	7.04	235.041			4.02	4	33.4464
	7.52	6.3	155.204			16	8.04	537.818
	7.18	5.32	105.67			10	6.44	215.663
	10.84	8.64	420.785			12.64	6.64	289.792
	5.14	4.82	62.0956			8.698	8.24	307.098
	7.88	6.72	185.041			11.84	9.06	505.372
	8.12	8	270.234			13.12	9.02	555.073
10 days after treatment
	DUb group				DMSO group
	Long diameter	Short diameter	Volume			Long diameter	Short diameter	Volume
	7.46	6.12	145.293			7.82	5	101.66
	8.24	7.82	262.026			17.12	10.34	951.805
	8.26	6.62	188.235			11.42	6.54	253.995
	8.24	6.36	173.318			11.52	7	293.53
	13.14	9.36	598.619			10.62	9.28	475.58
	7.22	7.08	188.195			20	8.68	783.561
	8.14	6.92	202.694			14.74	8.64	572.174
	12.12	8.46	451.073			11.84	10.54	683.969
	3.02	3	14.1336
12 days after treatment	DUb group				DMSO group
	Long diameter	Short diameter	Volume			Long diameter	Short diameter	Volume
	9	6.62	205.098			17	10.08	898.201
	7.94	6.5	174.442			13.14	7	334.807
	8.54	6.3	176.255			14.72	10.38	824.719
	7.32	6.8	176.008			10.62	9.62	511.067
	7.68	7.64	233.105			12.56	10.78	758.98
	14	10.26	766.348			20	10	1040
	9.02	8.54	342.078			20	18	3369.6
	10.26	10	533.52
	4.04	4	33.6128

## Sheet: Figure 1B tumor weight - raw da
tumor weight (g)
DMSO group	DUb group
0.874	0.164
0.519	0.23
0.416	0.167
0.354	0.183
0.647	0.075
0.765	0.78
1.226	0.216
	0.231
	0.447

## Sheet: Figure 1C CT26-Ki67 Raw data
DMSO-CT26	Ki67+	all	ki67+(%)		DUb-CT26	Ki67+	all	ki67+(%)
1#1	242	932	25.9657		1#1	213	1894	11.246
1#2	238	645	36.8992		1#2	233	2865	8.13264
1#3	366	1261	29.0246		1#3	242	1199	20.1835
1#4	309	939	32.9073		1#4	364	1426	25.5259
1#5	198	786	25.1908		1#5	192	2006	9.57129
1#6	262	801	32.7091
1#7	308	1166	26.4151		2#1	254	1610	15.7764
1#8	434	1830	23.7158		2#2	390	1971	19.7869
1#9	350	1791	19.5422		2#3	280	1268	22.082
1#10	292	1155	25.2814		2#4	277	2078	13.3301
1#11	332	1290	25.7364		2#5	181	1456	12.4313
1#12	369	1859	19.8494		2#6	338	1874	18.0363
1#13	335	1213	27.6175
					3#1	109	928	11.7457
2#1	432	1350	32		3#2	133	766	17.3629
2#2	328	2863	11.4565		3#3	228	888	25.6757
2#3	435	1928	22.5622		3#4	110	943	11.6649
2#4	433	1809	23.9359		3#5	125	1025	12.1951
2#5	432	1582	27.3072		3#6	105	886	11.851
2#6	437	1127	38.7755
					4#1	419	2207	18.985
3#1	201	3144	6.39313		4#2	323	2120	15.2358
3#2	347	980	35.4082		4#3	204	2238	9.11528
3#3	369	961	38.3975		4#4	273	1573	17.3554
3#4	367	980	37.449		4#5	350	1669	20.9706
3#5	412	1162	35.4561		4#6	230	1416	16.2429
3#6	377	999	37.7377		4#7	169	853	19.8124
4#1	326	838	38.9021		7#1	452	2799	16.1486
4#2	247	876	28.1963		7#2	229	1962	11.6718
4#3	373	1004	37.1514		7#3	277	3491	7.93469
4#4	250	1155	21.645		7#4	585	2427	24.1038
4#5	255	1160	21.9828		7#5	235	1444	16.2742
					7#6	331	2335	14.1756
5#1	314	969	32.4045
5#2	346	1188	29.1246		8#1	440	2940	14.966
5#3	366	1099	33.303		8#2	201	1577	12.7457
5#4	398	963	41.3292		8#3	251	2861	8.77316
5#5	244	1038	23.5067		8#4	231	1495	15.4515
5#6	260	918	28.3224		8#5	225	2131	10.5584
					8#6	221	1621	13.6336
6#1	373	1310	28.4733
6#2	391	1972	19.8276		9#1	417	1618	25.7726
6#3	426	1877	22.6958		9#2	403	1600	25.1875
6#4	469	2079	22.5589		9#3	405	1344	30.1339
6#5	325	872	37.2706		9#4	261	1481	17.6232
6#6	381	1930	19.7409		9#5	361	1679	21.5009
6#7	353	1445	24.4291
8#1	400	2466	16.2206
8#2	377	2025	18.6173
8#3	403	1440	27.9861
8#4	401	1680	23.869
8#5	124	2738	4.52885

## Sheet: Figure 2A-tumor volume-raw data
		54 days				51days				48days				45days				42 days				39days				36days				33days				30 days				28days				25days				22days
	DMSO							V18				V17				V16				V15		14				13				12				11				10						V09				V08
		7.04	5.92	128.298		6.98	5.88	125.491		6.78	5.64	112.148		6.62	5.56	106.417		6.28	5.18	87.6239		6.04	4.88	74.7963		5.84	4.68	66.5132		5.6	4.46	57.9243		5.22	4.32	50.6572		5.02	4.08	43.4538		4.84	3.82	36.7262		4.88	3.62	33.2537
		8.24	7.24	224.599		8.2	7.14	217.377		7.5	6.92	186.757		7.32	6.3	151.076		7.26	6.28	148.888		6.98	5.96	128.929		6.76	5.72	115.012		6.56	5.44	100.95		6.08	5.48	94.9441		5.54	5.12	75.5184		5.12	4.82	61.8539		5.02	4.5	52.8606
		8.92	7.56	265.101		8.68	7.5	253.89		8.2	7.06	212.533		7.9	6.38	167.214		7.88	6.32	163.668		7.46	6.02	140.584		7.22	5.82	127.171		7.1	5.68	119.113		6.84	5.42	104.486		6.48	5.2	91.114		5.56	4.86	68.289		4.56	4.46	47.167
		7.12	6.5	156.426		7.04	6.46	152.771		6.92	6.14	135.658		6.76	5.8	118.251		6.46	5.48	100.878		6.2	5.28	89.88		5.98	5.04	78.9888		5.84	4.88	72.3196		5.62	4.6	61.838		5.22	4.32	50.6572		4.96	4.2	45.4971		5.16	3.96	42.0769
		8.22	5.9	148.792		8.14	5.78	141.411		8.04	5.56	129.244		7.64	5.28	110.755		7.26	5.02	95.1366		6.98	4.76	82.238		6.74	4.62	74.8079		6.54	4.44	67.042		6.12	4.28	58.2965		5.88	4.02	49.412		5.42	3.72	39.0021		4.18	3.56	27.5473
		6.72	5	87.36		6.66	4.52	70.7546		6.54	4.46	67.6474		6.5	4.4	65.4368		6.04	4.22	55.9326		5.7	4	47.424		5.52	3.88	43.2121		5.36	3.76	39.4043		5.16	3.7	36.733		4.96	3.68	34.9286		4.48	3.56	29.5244		4.24	3.4	25.4875
				168.429
	Dub																													12				11				10				9
		5.12	4.76	60.3236				56.9462		4.82	4.5	50.7546		4.8	4.44	49.2051		4.64	4.28			4.44	3.98	36.5723		4.22	3.72	30.367		4.1	3.58	27.3246		3.98	3.46	24.7764		3.66	3.36	21.4864		3.44	3.26	19.0107		3.34	3.16	17.343
		5.42	4.8	64.9359				62.0944		5.2	4.32	50.4631		5.16	4.3	49.6124		5.06	4.28			4.82	4.04	40.9085		4.6	3.84	35.2715		4.34	3.62	29.574		4.18	3.54	27.2387		3.96	3.4	23.8044		3.24	3.2	17.2524		3.12	3.08	15.3907
		6.04	5.04	79.7813				72.2193		5.66	4.8	67.8113		5.52	4.56	59.6859		5.34	4.42			5.12	4.18	46.5185		5.04	3.98	41.5145		4.84	3.8	36.3426		4.62	3.76	33.9642		4.48	3.56	29.5244		4.22	3.28	23.6082		3.98	3.14	20.4054
		7.4	5.46	114.715				105.461		6.98	5.02	91.4674		6.56	4.76	77.2896		6.4	4.5			6.28	4.38	62.6486		5.8	4.26	54.7332		5.28	4.1	46.1535		4.74	4.1	41.4333		4.36	3.86	33.7804		4.04	3.44	24.86		3.72	3.3	21.0656
		6.46	5.02	84.6532				78.5113		6.28	4.62	69.7023		6.04	4.46	62.4755		5.78	4.34			5.56	4.2	51.0008		5.32	4.06	45.6002		5.18	3.78	38.4872		5.04	3.68	35.4919		4.78	3.6	32.2134		3.64	3.42	22.1389		3.52	3.16	18.2776
		4.24	4.08	36.702		4.2	4.1	36.713		4.12	4.08	35.6632		4.02	4	33.4464		4	4			4	4	33.28		3.86	3.8	28.984		3.76	3.74	27.3486		3.42	3.4	20.5583		3.5	3.5	22.295		3.38	3.2	17.9978		3.26	3.1	16.2909
				73.5185
		**				**				**				**					**			**				**				**				**				**				**				**
		168.4 ± 26.59 N=6				160.3 ± 26.87 N=6				140.7 ± 21.28 N=6				119.9 ± 14.66 N=6				108.7 ± 16.44 N=6				93.98 ± 14.24 N=6				84.28 ± 12.79 N=6				76.13 ± 11.89 N=6				67.83 ± 10.75 N=6				57.51 ± 8.705 N=6				46.82 ± 6.194 N=6				38.07 ± 4.509 N=6
		73.52 ± 10.74 N=6				68.66 ± 9.425 N=6				60.98 ± 7.976 N=6				55.29 ?6.059 N=6				50.66 ± 4.754 N=6				45.15 ± 4.377 N=6				39.41 ± 4.021 N=6				34.20 ± 3.063 N=6				30.58 ± 3.155 N=6				27.18 ± 2.176 N=6				20.81 ± 1.288 N=6				18.13 ± 0.9187 N=6
														days after treatment	DMSO-MEAN	DMSO-ERROR	DUb-MEAN	DUb-error
														1	15.57	0.1518	15.57	0.1519
														7	15.78	0.3951	15.44	0.3439
														13	20.88	1.326	15.98	0.4808
														19	30.98	3.048	16.52	0.6491
														25	46.82	6.194	20.81	1.288
														30	67.83	10.75	30.58	3.155
														36	84.28	12.79	39.41	4.021
														42	108.7	16.44	50.66	4.754
														48	140.7	21.28	60.98	7.976
														54	168.4	26.59	73.52	10.74
[truncated: 21 more columns]

## Sheet: Figure 2B tumor weight - raw da
DMSO	DUb
0.12	0.052
0.14	0.045
0.145	0.053
0.154	0.074
0.15	0.06
0.178	0.049
0.143	0.047
0.125	0.067
0.135	0.048
0.2	0.0835
0.216

## Sheet: Figure 2C PDX-Ki67 Raw data
DMSO	ki67+	all		ki67+(%)			DUb	ki67+	all		ki67+(%)
1#-1	168	357	0.470588	47.0588			1#-1	79	351	0.225071	22.5071
1#-2	184	387	0.475452	47.5452			1#-3	119	416	0.286058	28.6058
1#-3	191	288	0.663194	66.3194			1#-4	130	422	0.308057	30.8057
1#-4	285	498	0.572289	57.2289			1#-7	52	362	0.143646	14.3646
4#-15	235	350	0.671429	67.1429			4#-1	73	264	0.276515	27.6515
4#-14	238	412	0.57767	57.767			4#-3	79	286	0.276224	27.6224
4#-4	218	435	0.501149	50.1149			4#-4	51	199	0.256281	25.6281
4#-7	200	427	0.468384	46.8384			4#-12	89	278	0.320144	32.0144
5#-2	160	294	0.544218	54.4218			5#-1	58	310	0.187097	18.7097
5#-3	138	220	0.627273	62.7273			5#-3	56	288	0.194444	19.4444
5#-16	191	396	0.482323	48.2323			5#-5	62	307	0.201954	20.1954
5#-14	120	368	0.326087	32.6087			5#-8	90	389	0.231362	23.1362
