# Supplementary material for: Decylubiquinone Inhibits Colorectal Cancer Growth Through Upregulating Sirtuin2
Source: Front Pharmacol. 2022 Feb 1;12:804265. doi: 10.3389/fphar.2021.804265 (PMC8844026; doi:10.3389/fphar.2021.804265)
Supplement: Supplementary file 7 [file Table5.XLSX]

## Sheet: Figure 6A WB Raw data
tublin	1	30646.4		32542.9		30028.8
	2	30589.9		33300.9		31494.2
	3	32327.6		34589.7		32840.5
	4	31095.8		33331.2		30644.2
	5	28958.3		31006.9		30464.5
sirt2-siSIRT2	6	11493.9	0.375049	12049.9	0.370277	11227.8	0.373902
	7	21568.6	0.705089	23277.7	0.69901	21895.7	0.69523
	8	12526.4	0.387483	13492.2	0.390065	12833.2	0.390775
	9	5485.33	0.176401	5814.03	0.174432	5565.86	0.181628
	10	11229.9	0.387795	12048.6	0.388578	11445.3	0.375695
	平均值	30143.2
	DMSO	DUb	NC	DMSO-siSRIT2	Dub-siSRIT2
表达量	0.375049	0.705089	0.387483	0.176401	0.387795
	0.370277	0.69901	0.390065	0.174432	0.388578
	0.373902	0.69523	0.390775	0.181628	0.375695
DMSO组平均值	0.373076	0.373076	0.373076	0.373076	0.373076
归一处理	1.00529	1.88993	1.03862	0.472828	1.03945
	0.992499	1.87364	1.04554	0.467552	1.04155
	1.00221	1.86351	1.04744	0.48684	1.00702

## Sheet: Figure 6B-LoVo clony Raw data
	DMSO-siSIRT2	DUb-NC	DUb-siSIRT2
1	231	153	227
2	258	210	253
3	275	195	244
4	235	211	221

## Sheet: Figure 6C-migration 
DMSO-siSIRT2		Count
	图像_42919.tif	170	688308	4048.87	14.644	124.041	501655		DUb-NC		Count
	图像_42918.tif	165	752057	4557.92	16.001	132.821	597080			图像_42995.tif	175	809893	4627.96	17.231	158.679	732234
	图像_42920.tif	190	578777	3046.2	12.314	113.309	344261			图像_42996.tif	214	842419	3936.54	17.923	163.077	642366
	图像_42921.tif	175	1537226	8784.15	32.706	135.537	1.17214e+06			图像_43000.tif	160	485764	3036.03	10.335	157.051	476827
	图像_42922.tif	276	1010184	3660.09	21.493	111.281	405417			图像_43001.tif	176	708608	4026.18	15.076	168.116	678029
	图像_42923.tif	160	1521733	9510.83	32.376	145.639	1.34883e+06			图像_43002.tif	139	525246	3778.75	11.175	165.633	630396
	图像_42924.tif	159	1146819	7212.7	24.4	158.257	1.12885e+06
	图像_42925.tif	243	1170779	4818.02	24.909	123.459	591699			图像_43003.tif	148	434012	2932.51	9.234	153.439	449938
	图像_42926.tif	175	668712	3821.21	14.227	118.732	455826			图像_43004.tif	175	767370	4384.97	16.326	171.145	749176
	图像_42928.tif	162	582012	3592.67	12.383	128.359	462335			图像_43005.tif	186	642717	3455.47	13.674	153.789	533803
										图像_43007.tif	141	560530	3975.39	11.926	161.468	642179
DMSO-siSIRT2		Count								图像_43008.tif	161	610029	3789	12.979	163.382	621586
	图像_42979.tif	200	1211558	6057.79	25.777	103.699	627391			图像_43009.tif	158	653665	4137.12	13.907	161.058	667394
	图像_42980.tif	222	1445264	6510.2	30.749	100.823	650125
	图像_42981.tif	164	940061	5732.08	20.001	107.636	609035
	图像_42982.tif	174	1492398	8577	31.752	109.13	927116
	图像_42983.tif	188	1147742	6105.01	24.419	108.359	655217
	图像_42984.tif	192	1048108	5458.9	22.299	101.32	549598
	图像_42985.tif	190	948567	4992.46	20.182	109.824	543878
	图像_42986.tif	183	935336	5111.13	19.9	108.68	554363
	图像_42987.tif	164	672799	4102.43	14.314	104.946	431106
Dub-siSIRT2		Count
	图像_43030.tif	231	822848	3562.11	17.507	195.566	694896
	图像_43032.tif	193	987611	5117.15	21.012	194.376	990753
	图像_43033.tif	215	851993	3962.76	18.127	192.853	758946
	图像_43034.tif	167	1235602	7398.81	26.289	210.935	1.55079e+06
	图像_43035.tif	204	987465	4840.52	21.009	208.015	1.00376e+06
	图像_43036.tif	170	1393841	8199.07	29.655	216.167	1.75433e+06
	图像_43037.tif	251	916701	3652.2	19.504	196.493	713779
	图像_43038.tif	214	1012545	4731.52	21.543	198.28	937436
	图像_43040.tif	199	1003772	5044.08	21.356	202.356	1.01142e+06
	图像_43041.tif	188	1026148	5458.23	21.832	195.659	1.06209e+06
	图像_43042.tif	238	1155431	4854.75	24.583	188.756	912213
	图像_43043.tif	250	957183	3828.73	20.365	185.237	704427
	图像_43044.tif	261	1067815	4091.24	22.719	188.574	768955

## Sheet: Figure 6C-invasion 
DMSO-siSIRT2		Count							DUb-NC		Count
	图像_43532.tif	293	1518362	5182.12	32.304	141.532	719912			图像_43572.tif	214	631413	2950.53	13.434	136.955	392190		DMSO-siSIRT2		Count
	图像_43533.tif	218	1866823	8563.41	39.718	149.551	1.26708e+06			图像_43573.tif	172	536434	3118.8	11.413	111.429	332861			图像_43609.tif	308	806240	2617.66	17.153	121.084	313727
	图像_43534.tif	253	1847206	7301.21	39.301	146.176	1.05176e+06			图像_43574.tif	264	763702	2892.81	16.248	127.533	362608			图像_43607.tif	301	872334	2898.12	18.56	118.236	351507
	图像_43536.tif	171	2055153	12018.4	43.725	155.769	1.85432e+06			图像_43575.tif	242	600457	2481.23	12.775	105.151	268179			图像_43606.tif	256	682043	2664.23	14.511	98.055	260696
	图像_43537.tif	269	1683396	6257.98	35.816	145.253	909417			图像_43576.tif	210	552626	2631.55	11.758	130.77	339473			图像_43605.tif	270	1150606	4261.5	24.48	130.124	538964
	图像_43538.tif	274	1417043	5171.69	30.149	117.158	596957			图像_43577.tif	236	656700	2782.63	13.972	125.448	348444			图像_43610.tif	307	867832	2826.81	18.464	124.613	350644
	图像_43539.tif	258	1499294	5811.22	31.899	143.675	821620			图像_43578.tif	237	622677	2627.33	13.248	105.282	269340			图像_43612.tif	194	926924	4777.96	19.721	111.316	529698
	图像_43540.tif	221	1098547	4970.8	23.373	138.542	679115			图像_43579.tif	229	583606	2548.5	12.417	129.023	321125			图像_43613.tif	264	1051414	3982.63	22.37	113.699	453399
	图像_43541.tif	299	1221211	4084.32	25.982	102.055	412103												图像_43614.tif	265	1125788	4248.26	23.952	123.158	524459
										图像_43580.tif	223	558821	2505.92	11.889	106.73	270617
	图像_43542.tif	273	1243961	4556.63	26.466	114.99	516745			图像_43581.tif	210	575310	2739.57	12.24	102.854	280596			图像_43615.tif	272	1134156	4169.69	24.13	126.315	539609
	图像_43543.tif	243	1093813	4501.29	23.272	151.337	676640			图像_43582.tif	228	775957	3403.32	16.509	103.933	353420			图像_43616.tif	283	1046662	3698.45	22.269	123.655	452812
	图像_43544.tif	229	1541098	6729.69	32.788	119.181	795541			图像_43583.tif	228	588542	2581.32	12.522	104.437	267483			图像_43617.tif	279	746854	2676.9	15.89	111.162	294752
	图像_43545.tif	302	1452497	4809.59	30.903	111.774	534131			图像_43584.tif	249	822667	3303.88	17.503	122.503	401894			图像_43618.tif	249	742518	2982	15.798	104.551	314352
	图像_43546.tif	292	1246940	4270.34	26.53	151.303	643038			图像_43585.tif	259	941148	3633.78	20.024	128.149	453490			图像_43619.tif	305	987352	3237.22	21.007	115.597	370779
	图像_43547.tif	215	1742823	8106.15	37.08	126.138	1.01257e+06			图像_43586.tif	240	864342	3601.43	18.39	133.893	483659			图像_43621.tif	277	1038130	3747.76	22.087	118.8	447661
	图像_43548.tif	266	1668322	6271.89	35.495	124.177	764379			图像_43587.tif	265	900929	3399.73	19.168	138.777	460301			图像_43622.tif	268	1039992	3880.57	22.127	129.171	492537
	图像_43549.tif	261	1588063	6084.53	33.787	128.192	767845			图像_43588.tif	286	717293	2508.02	15.261	131.91	323619			图像_43623.tif	237	1112794	4695.33	23.676	119.88	555502
	图像_43550.tif	266	1350852	5078.39	28.741	139.994	698336
	图像_43551.tif	284	1447878	5098.16	30.805	137.343	690952
